# Supplementary material for: Theoretical study on thermal curing mechanism of arylethynyl-containing resins
Source: Royal Society of Chemistry journal article supplement (doi:10.1039/c9cp06892a), 2020-01-01
Supplement: c9cp06892a1.pdf [file c9cp06892a1.pdf]

## Supplementary Information for

# Theoretical Study on Thermal Curing Mechanism of Arylethynyl- Containing Resins

Zuwei Chen, Liquan Wang\*, Jiaping Lin\* and Lei Du

Shanghai Key Laboratory of Advanced Polymeric Materials, Key Laboratory for Ultrafine Materials  
of Ministry of Education, School of Materials Science and Engineering, East China University of  
Science and Technology, Shanghai 200237, China

### Contents

|                                                               |            |
|---------------------------------------------------------------|------------|
| <b>1. Computational Results .....</b>                         | <b>S2</b>  |
| <b>2. Cartesian Coordinates and Associated Energies .....</b> | <b>S10</b> |
| <b>3. Full Citation of Reference 27 .....</b>                 | <b>S96</b> |

---

#### Corresponding Author

\* Tel: +86-21-64253370; E-mail: jlin@ecust.edu.cn (J. Lin) and lq\_wang@ecust.edu.cn (L. Wang)

# 1. Computational Results

## 1.1 Transition states for the formation of Dewar benzenes (for phenylacetylene)

The diphenylcyclobutadiene **INT3** reacts with a phenylacetylene molecule to generate Dewar benzene **INT5** via a concerted or diradical mechanism. The stepwise pathway through **TS7** generating diradical intermediate **INT4** is the most favored according to the activation free energies. As such, the main product could be 1,2,4-triphenylbenzene generated by further isomerization of Dewar benzene.

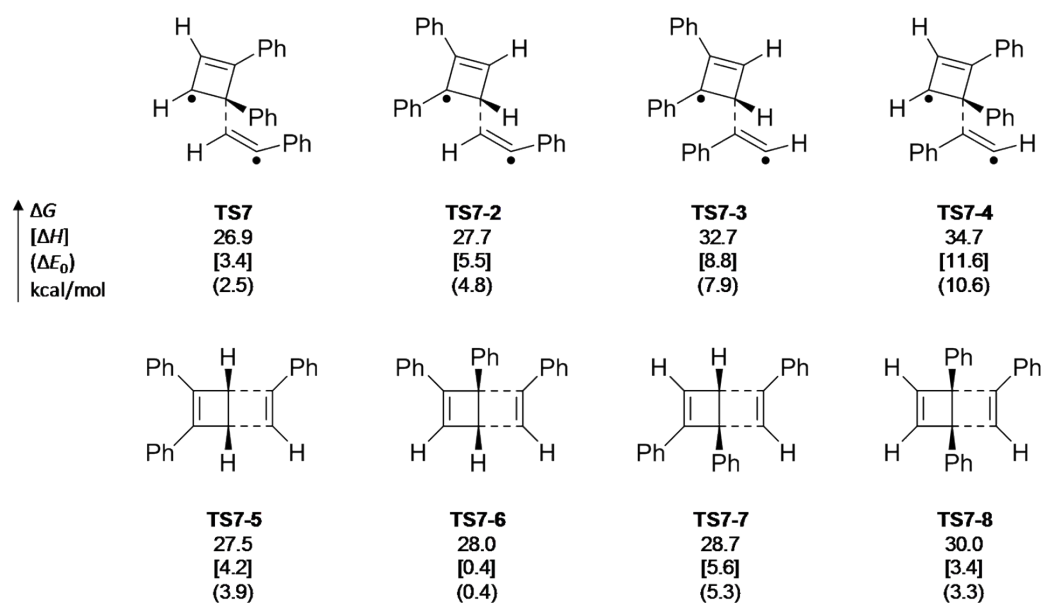

**Figure S1.** Transition states for the reaction of diphenylcyclobutadiene **INT3** with a phenylacetylene molecule. The energies of the transition states are relative to the energies of diphenylcyclobutadiene **INT3** and phenylacetylene.

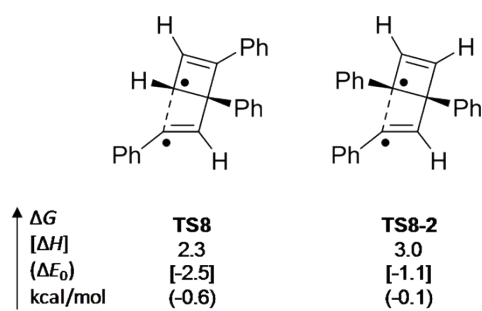

**Figure S2.** Transition states for the intramolecular coupling of diradical intermediate **INT4** to Dewar benzene **INT5**. The energies of the transition states are relative to the energies of diradical intermediate **INT4**.

## 1.2 Transition states for the diradical growth of INT1

The diradical intermediate **INT1** reacts with a phenylacetylene molecule to initiate diradical polymerization. The reaction pathway through **TS4** is the most favored according to the activation free energies.

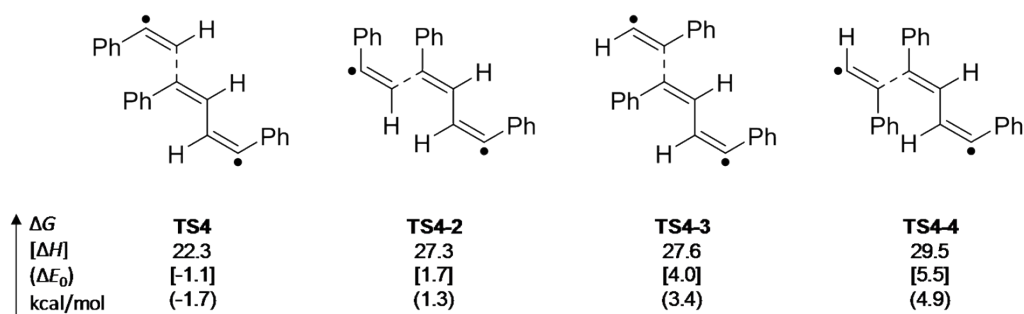

**Figure S3.** Transition states for the diradical growth of **INT1**. The energies of the transition states are relative to the energies of diradical **INT1** and phenylacetylene.

### 1.3 Transition states for the formation of Dewar benzenes (for diphenylacetylene)

The tetraphenylcyclobutadiene **INT3-Ph** reacts with a diphenylacetylene molecule to generate Dewar benzene **INT5-Ph** *via* a concerted or diradical mechanism. The stepwise reaction pathway generating diradical intermediate **INT4-Ph** through **TS7-Ph** is the most favored according to the activation free energies.

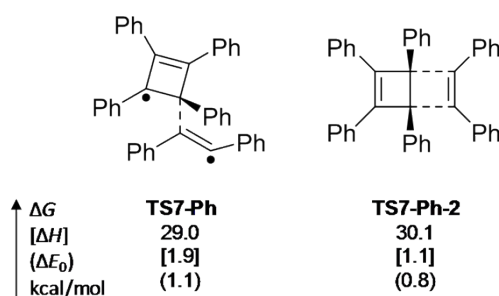

**Figure S4.** Transition states for the reaction of tetraphenylcyclobutadiene **INT3-Ph** with a diphenylacetylene molecule. Transition states for the formation of Dewar benzenes. The energies of the transition states are relative to the energies of tetraphenylcyclobutadiene **INT3-Ph** and diphenylacetylene.

#### 1.4 Transition states for the diradical growth of INT1-Ph

The diradical intermediate **INT1-Ph** reacts with a diphenylacetylene molecule to initiate diradical polymerization. The reaction pathway through **TS4-Ph** is the most favored according to the activation free energies.

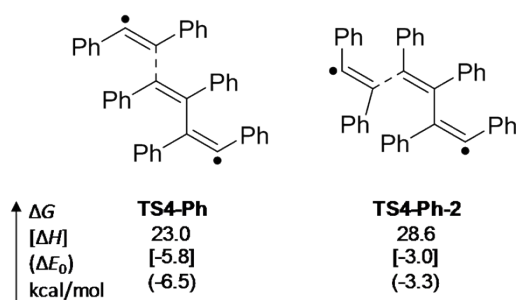

**Figure S5.** Transition states for the diradical growth of **INT1-Ph**. The energies of the transition states are relative to the energies of diradical **INT1-Ph** and diphenylacetylene.

### 1.5 Transition states for the dimerization of various arylacetylenes

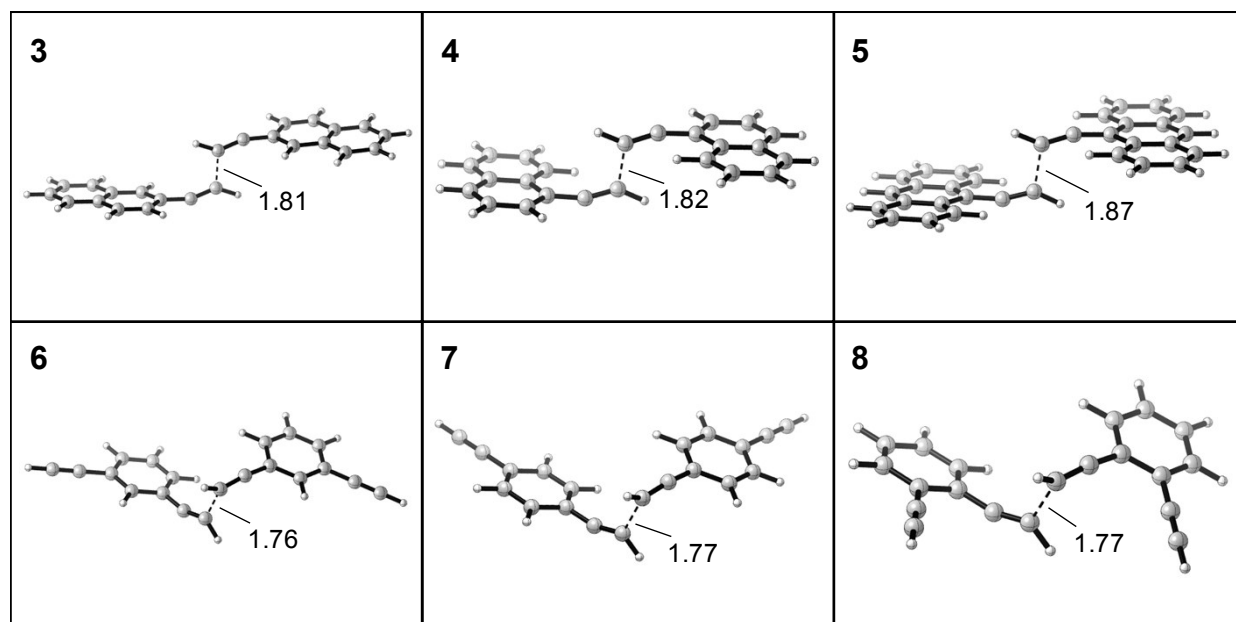

**Figure S6.** Transition states for the dimerization of various arylacetylenes in **Table 1** (compounds **3-8**). Bond lengths are given in Å.

### 1.6 Energy surfaces of the favored reaction pathways calculated by (U)M06-2X/6-311G(d,p)

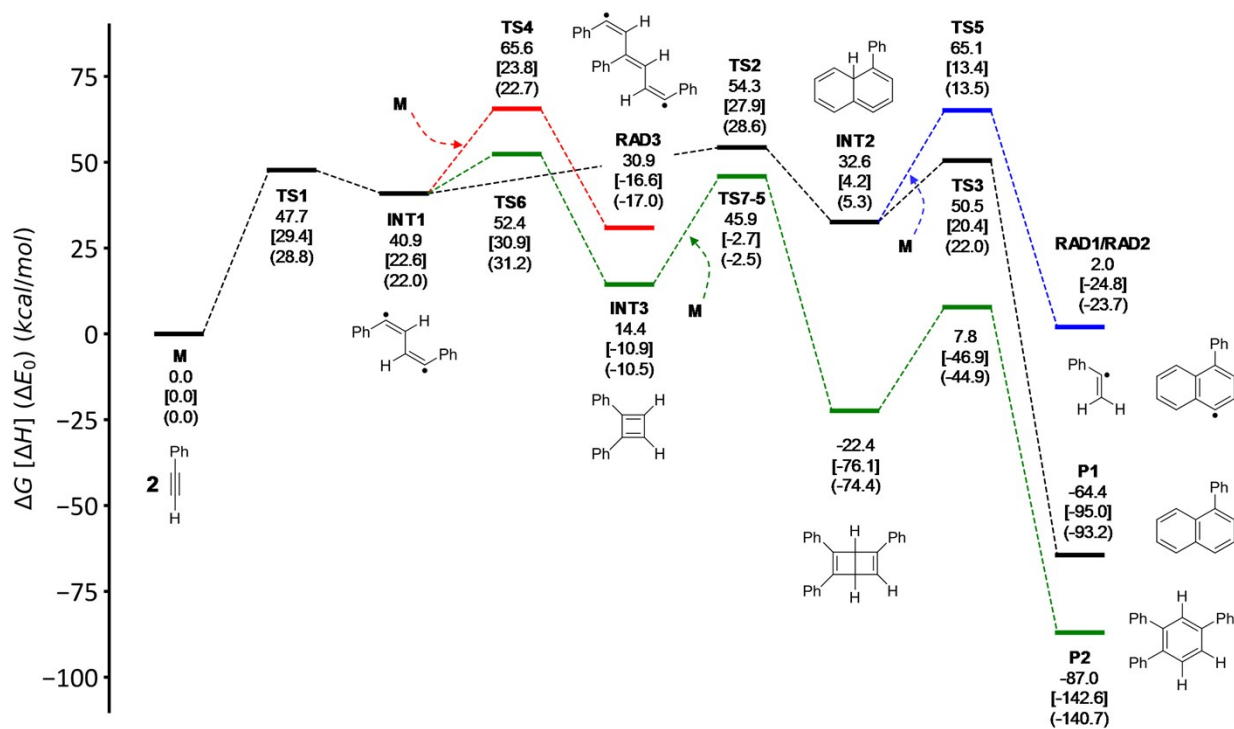

**Figure S7.** The (U)M06-2X/6-311G(d,p) computed energy surfaces of the favored reaction pathways of phenylacetylene. Gibbs free energies and enthalpies [in brackets] are calculated at 573.15 K in the gas phase. Electronic energies with zero-point energy correction (in parenthesis) are also given.



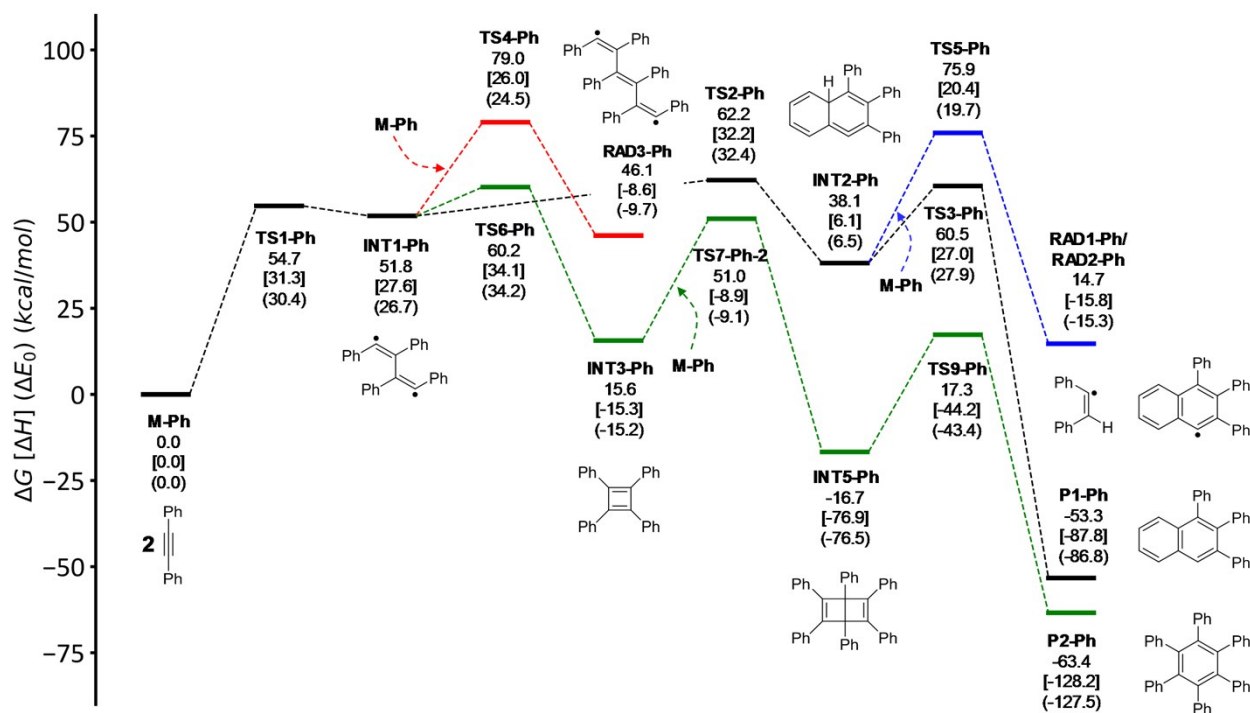

**Figure S8.** The (U)M06-2X/6-311G(d,p) computed energy surfaces of the favored reaction pathways of diphenylacetylene.

The energy surfaces calculated by (U)B3LYP-D3BJ/6-311G(d,p)/(U)M06-2X/6-311G(d,p) are generally identical with those calculated by (U)M06-2X/6-311G(d,p). There are two main differences between the energy surfaces calculated by (U)B3LYP and (U)M06-2X, since the UM06-2X functional overestimates the energies of diradical transition states. One is that the cyclobutadiene **INT3** reacts with a molecule of phenylacetylene is favored *via* a stepwise pathway generating a diradical intermediate first instead of a concerted pathway. (Note that the computational results show that the activation free energies for the competitive reactions are slightly different.) The other is that the formation of polyene is preferred by monoradical initiation instead of diradical growth. The reason is that the UB3LYP calculation shows the transition state **TS5** for intermolecular hydrogen abstraction is a singlet diradical, of which activation barrier was previously overestimated. Such a conclusion is consistent with most studies of the polymerization involving diradicals.

## 2. Cartesian Coordinates and Associated Energies

All calculations were implemented with Gaussian 09 program package. The molecular structures in the gas phase were optimized using (U)M06-2X/6-311G(d,p). Electronic energies were calculated using (U)B3LYP/6-311G(d,p) with a D3 dispersion correction damped according to the scheme of Becke and Johnson. All thermal dynamic contributions were computed at 300 °C. Scaling factor of frequencies is 0.946. The  $\langle S^2 \rangle$  values of open shell species are also given.

### M

|   |             |             |             |
|---|-------------|-------------|-------------|
| C | -1.50677200 | -1.20449600 | -0.00001000 |
| C | -0.11895500 | -1.20848200 | 0.00001200  |
| C | 0.58577800  | -0.00002100 | 0.00001900  |
| C | -0.11893900 | 1.20847400  | 0.00001100  |
| C | -1.50673700 | 1.20451700  | -0.00000900 |
| C | -2.20300600 | 0.00001000  | -0.00002200 |
| H | -2.04670000 | -2.14360100 | -0.00001800 |
| H | 0.43228100  | -2.14060800 | 0.00002000  |
| H | 0.43234200  | 2.14057300  | 0.00001900  |
| H | -2.04666800 | 2.14362100  | -0.00001700 |
| H | -3.28625500 | 0.00003400  | -0.00003900 |
| C | 2.01974800  | -0.00001300 | 0.00004800  |
| C | 3.22069500  | 0.00000500  | 0.00002600  |
| H | 4.28412900  | 0.00001500  | -0.00042000 |

SCF Done: E(RM062X) = -308.334329570 A.U.

|                                          |                             |
|------------------------------------------|-----------------------------|
| Zero-point correction=                   | 0.104523 (Hartree/Particle) |
| Thermal correction to Energy=            | 0.127271                    |
| Thermal correction to Enthalpy=          | 0.129086                    |
| Thermal correction to Gibbs Free Energy= | 0.033224                    |

SCF Done: E(RB3LYP) = -308.497988944 A.U.

### TS1

|   |            |            |             |
|---|------------|------------|-------------|
| C | 4.24623700 | 1.56666400 | -0.24100500 |
| C | 3.02719900 | 1.89631100 | 0.34891200  |
| C | 4.55072900 | 0.23122400 | -0.49954800 |

|   |             |             |             |
|---|-------------|-------------|-------------|
| H | 4.95521900  | 2.34505500  | -0.49465600 |
| C | 2.11469200  | 0.90776700  | 0.67445200  |
| H | 2.78794100  | 2.93344000  | 0.55269500  |
| C | 3.65275900  | -0.76972700 | -0.17141600 |
| H | 5.49794000  | -0.02871200 | -0.95692100 |
| C | 2.41187200  | -0.44719200 | 0.41520100  |
| H | 1.16310500  | 1.15631000  | 1.12857400  |
| H | 3.88877500  | -1.80951800 | -0.36176900 |
| C | 1.48636800  | -1.44958000 | 0.74824000  |
| C | 0.49260500  | -2.21361600 | 0.73051400  |
| C | -0.49260600 | -2.21361600 | -0.73051500 |
| C | -1.48636900 | -1.44958000 | -0.74824000 |
| C | -2.41187200 | -0.44719200 | -0.41520200 |
| C | -2.11469300 | 0.90776600  | -0.67445400 |
| C | -3.65275900 | -0.76972700 | 0.17141800  |
| C | -3.02719900 | 1.89631100  | -0.34891300 |
| H | -1.16310600 | 1.15630900  | -1.12857800 |
| C | -4.55072800 | 0.23122400  | 0.49955000  |
| H | -3.88877500 | -1.80951700 | 0.36177200  |
| C | -4.24623600 | 1.56666400  | 0.24100600  |
| H | -2.78794100 | 2.93344000  | -0.55269700 |
| H | -5.49793800 | -0.02871100 | 0.95692500  |
| H | -4.95521800 | 2.34505600  | 0.49465800  |
| H | 0.04765700  | -2.92767900 | 1.40515800  |
| H | -0.04765800 | -2.92768000 | -1.40515800 |

SCF Done: E(UM062X) = -616.621179090 A.U.

<S\*\*2> = 0.3225

|                                          |                             |
|------------------------------------------|-----------------------------|
| Zero-point correction=                   | 0.207514 (Hartree/Particle) |
| Thermal correction to Energy=            | 0.255751                    |
| Thermal correction to Enthalpy=          | 0.257566                    |
| Thermal correction to Gibbs Free Energy= | 0.095056                    |

SCF Done: E(UB3LYP) = -616.962651218 A.U.

<S\*\*2> = 0.2183

### INT1

|   |             |             |             |
|---|-------------|-------------|-------------|
| C | -5.57278600 | 0.00010600  | 0.38230500  |
| C | -4.90658200 | 1.20641000  | 0.16806600  |
| C | -4.90673200 | -1.20627400 | 0.16802700  |
| H | -6.60437300 | 0.00016400  | 0.71224200  |
| C | -3.59009600 | 1.21515000  | -0.25619100 |
| H | -5.42102700 | 2.14539700  | 0.33458200  |
| C | -3.59024700 | -1.21516400 | -0.25623200 |

|   |             |             |             |
|---|-------------|-------------|-------------|
| H | -5.42129100 | -2.14520300 | 0.33451600  |
| C | -2.89910000 | -0.00004700 | -0.46930600 |
| H | -3.06897400 | 2.14927900  | -0.42658500 |
| H | -3.06924000 | -2.14935300 | -0.42665400 |
| C | -1.56993000 | -0.00011400 | -0.92083000 |
| C | -0.28394800 | -0.00010100 | -0.69364200 |
| C | 0.28397200  | -0.00009200 | 0.69373100  |
| C | 1.56995600  | -0.00010500 | 0.92091300  |
| C | 2.89911200  | -0.00004300 | 0.46933800  |
| C | 3.59010100  | 1.21515100  | 0.25619100  |
| C | 3.59024600  | -1.21516200 | 0.25623800  |
| C | 4.90656900  | 1.20640800  | -0.16812300 |
| H | 3.06898700  | 2.14928200  | 0.42660600  |
| C | 4.90671300  | -1.20627700 | -0.16807800 |
| H | 3.06924400  | -2.14934900 | 0.42668500  |
| C | 5.57276000  | 0.00010100  | -0.38238800 |
| H | 5.42100900  | 2.14539300  | -0.33466300 |
| H | 5.42126300  | -2.14520700 | -0.33458700 |
| H | 6.60433300  | 0.00015700  | -0.71236900 |
| H | 0.44182700  | -0.00011800 | -1.50350900 |
| H | -0.44180100 | -0.00011500 | 1.50359900  |

SCF Done: E(UM062X) = -616.634451174 A.U.

<S\*\*2> = 1.0096

|                                          |                             |
|------------------------------------------|-----------------------------|
| Zero-point correction=                   | 0.209956 (Hartree/Particle) |
| Thermal correction to Energy=            | 0.258211                    |
| Thermal correction to Enthalpy=          | 0.260027                    |
| Thermal correction to Gibbs Free Energy= | 0.097478                    |

SCF Done: E(UB3LYP) = -616.974949535 A.U.

<S\*\*2> = 0.9393

## TS2

|   |            |             |             |
|---|------------|-------------|-------------|
| C | 0.98341600 | -2.42140000 | 0.44784100  |
| C | 2.03121300 | -2.28122900 | -0.48914800 |
| C | 2.73471700 | -1.10490700 | -0.58076500 |
| C | 2.39794400 | -0.00883300 | 0.25152400  |
| C | 1.30891000 | -0.14073900 | 1.15380300  |
| C | 0.64394800 | -1.37583200 | 1.27455900  |
| C | 2.91317100 | 1.28051600  | 0.08769100  |
| C | 2.26850400 | 2.37983900  | -0.22023000 |
| H | 0.45705900 | -3.36556600 | 0.52312200  |
| H | 3.54388500 | -0.99025700 | -1.29166800 |
| H | 1.12928200 | 0.64481800  | 1.87777200  |

|   |             |             |             |
|---|-------------|-------------|-------------|
| H | -0.15208800 | -1.48803600 | 2.00126600  |
| C | -3.79940800 | -0.53356300 | -0.13016900 |
| C | -3.53134000 | 0.55595700  | 0.69635700  |
| C | -2.29497400 | 1.17967600  | 0.65496900  |
| C | -1.29746600 | 0.72274500  | -0.22805400 |
| C | -1.57198500 | -0.39301300 | -1.04385200 |
| C | -2.81545600 | -1.00208100 | -0.99863900 |
| C | -0.00826100 | 1.30706500  | -0.23667900 |
| C | 0.79900000  | 2.26140100  | -0.59446500 |
| H | -4.76814800 | -1.01681500 | -0.09459700 |
| H | -4.29374100 | 0.92240600  | 1.37369800  |
| H | -2.08070800 | 2.02758300  | 1.29471600  |
| H | -0.79325300 | -0.76261500 | -1.70095100 |
| H | -3.01994100 | -1.85160400 | -1.63963100 |
| H | 2.28435000  | -3.11320300 | -1.13556800 |
| H | 0.43274400  | 3.06193900  | -1.23611300 |
| H | 2.68897000  | 3.37775500  | -0.24050100 |

SCF Done: E(UM062X) = -616.624003581 A.U.

<S\*\*2> = 0.6030

Zero-point correction= 0.210009 (Hartree/Particle)

Thermal correction to Energy= 0.256176

Thermal correction to Enthalpy= 0.257991

Thermal correction to Gibbs Free Energy= 0.108398

SCF Done: E(UB3LYP) = -616.966457487 A.U.

<S\*\*2> = 0.4758

## INT2

|   |             |             |             |
|---|-------------|-------------|-------------|
| C | 1.64321000  | -2.31612100 | 0.45090800  |
| C | 2.78717600  | -1.95767700 | -0.37529400 |
| C | 3.17897100  | -0.67324200 | -0.50131500 |
| C | 2.44304200  | 0.38109100  | 0.14811200  |
| C | 1.11590000  | 0.08177800  | 0.81420500  |
| C | 0.86568400  | -1.38310700 | 1.01437800  |
| C | 2.60604000  | 1.69655200  | -0.03922000 |
| C | 1.70260300  | 2.63202700  | -0.25928100 |
| H | 1.44183700  | -3.36678700 | 0.62652500  |
| H | 4.04893300  | -0.39949700 | -1.08662600 |
| H | 1.03954600  | 0.56182200  | 1.80109500  |
| H | 0.04576000  | -1.66799600 | 1.66439200  |
| C | -3.97325400 | -0.63986500 | -0.17737800 |
| C | -3.70789200 | 0.56766300  | 0.45699600  |
| C | -2.40642800 | 1.05559300  | 0.51091800  |

|   |             |             |             |
|---|-------------|-------------|-------------|
| C | -1.35382900 | 0.34056800  | -0.06451500 |
| C | -1.63118000 | -0.87547600 | -0.69830200 |
| C | -2.93190500 | -1.35774300 | -0.75872500 |
| C | 0.03061300  | 0.87163300  | -0.01823200 |
| C | 0.35098400  | 2.05986700  | -0.54643700 |
| H | -4.98676300 | -1.02023200 | -0.22168400 |
| H | -4.51367800 | 1.13153800  | 0.91202400  |
| H | -2.19408500 | 1.99506100  | 1.00863700  |
| H | -0.82095700 | -1.42927100 | -1.15829200 |
| H | -3.13478100 | -2.29409500 | -1.26494900 |
| H | 3.33862900  | -2.74773100 | -0.87125400 |
| H | -0.39493100 | 2.64149300  | -1.07695100 |
| H | 1.81208300  | 3.69444500  | -0.07382500 |

SCF Done: E(RM062X) = -616.665430709 A.U.

|                                          |                             |
|------------------------------------------|-----------------------------|
| Zero-point correction=                   | 0.214258 (Hartree/Particle) |
| Thermal correction to Energy=            | 0.259896                    |
| Thermal correction to Enthalpy=          | 0.261711                    |
| Thermal correction to Gibbs Free Energy= | 0.115149                    |

SCF Done: E(RB3LYP) = -616.996242205 A.U.

### TS3

|   |             |             |             |
|---|-------------|-------------|-------------|
| C | 2.03686400  | -2.31907800 | -0.39004800 |
| C | 3.34847300  | -1.77002700 | -0.20759300 |
| C | 3.51630400  | -0.44049100 | -0.01320700 |
| C | 2.40619000  | 0.49418100  | 0.05097800  |
| C | 1.02900600  | -0.12570900 | -0.03077200 |
| C | 0.93012200  | -1.54157700 | -0.32136300 |
| C | 2.64756200  | 1.90519500  | 0.14656400  |
| C | 1.46854700  | 2.64224900  | 0.22789100  |
| H | 1.93303200  | -3.37430500 | -0.61345000 |
| H | 4.49423800  | 0.01932400  | 0.05956900  |
| H | 1.70294400  | 0.05679900  | 1.04980900  |
| H | -0.05144700 | -1.95521200 | -0.51570200 |
| C | -4.13974200 | -0.64680100 | 0.00033600  |
| C | -3.22454900 | -1.22007400 | 0.87775500  |
| C | -1.90859100 | -0.77683600 | 0.90044600  |
| C | -1.48565800 | 0.24563700  | 0.04521000  |
| C | -2.41399300 | 0.81658600  | -0.82858200 |
| C | -3.73129000 | 0.37362200  | -0.85062500 |
| C | -0.09244700 | 0.75562500  | 0.08467000  |

|   |             |             |             |
|---|-------------|-------------|-------------|
| C | 0.16387500  | 2.10315800  | 0.23557100  |
| H | -5.16595900 | -0.99325500 | -0.01801300 |
| H | -3.53894600 | -2.00770200 | 1.55209700  |
| H | -1.20280500 | -1.21248100 | 1.60019300  |
| H | -2.09024500 | 1.60234500  | -1.50201000 |
| H | -4.43794700 | 0.82222100  | -1.53872500 |
| H | 4.20879200  | -2.42563800 | -0.26400400 |
| H | -0.69025900 | 2.76571100  | 0.35410800  |
| H | 1.53457000  | 3.72823400  | 0.27274100  |

SCF Done: E(RM062X) = -616.634965760 A.U.

|                                          |                             |
|------------------------------------------|-----------------------------|
| Zero-point correction=                   | 0.210477 (Hartree/Particle) |
| Thermal correction to Energy=            | 0.255155                    |
| Thermal correction to Enthalpy=          | 0.256970                    |
| Thermal correction to Gibbs Free Energy= | 0.113254                    |

SCF Done: E(RB3LYP) = -616.963332847 A.U.

#### P1

|   |             |             |             |
|---|-------------|-------------|-------------|
| C | 3.30140500  | -1.82697700 | -0.22221200 |
| C | 3.47375900  | -0.48284300 | -0.03706300 |
| C | 2.35899200  | 0.39047100  | 0.04993900  |
| C | 1.04398100  | -0.14803600 | -0.03663900 |
| C | 0.90087800  | -1.54550500 | -0.25239200 |
| C | 1.99795300  | -2.36047300 | -0.34155000 |
| H | 3.54449800  | 2.18216800  | 0.27176100  |
| H | 4.16012100  | -2.48428800 | -0.28849700 |
| H | 4.46945300  | -0.05928100 | 0.04018800  |
| C | 2.53594500  | 1.78884200  | 0.20541100  |
| C | -0.07410900 | 0.74166000  | 0.05818900  |
| H | -0.09184900 | -1.96321900 | -0.36345800 |
| H | 1.86734800  | -3.42248300 | -0.51226800 |
| C | 0.14752400  | 2.09273000  | 0.18939800  |
| C | 1.45428000  | 2.62255700  | 0.26191000  |
| C | -1.47517100 | 0.24232800  | 0.02870200  |
| C | -2.37654000 | 0.73772600  | -0.91583800 |
| C | -1.92954300 | -0.68578300 | 0.97029000  |
| C | -3.70045000 | 0.31318900  | -0.92338100 |
| H | -2.02649900 | 1.45084300  | -1.65408100 |
| C | -3.25293700 | -1.10781700 | 0.96472500  |
| H | -1.23921700 | -1.06355000 | 1.71687700  |
| C | -4.14200600 | -0.61057900 | 0.01646000  |

|   |             |             |             |
|---|-------------|-------------|-------------|
| H | -4.38661400 | 0.70272100  | -1.66619200 |
| H | -3.59374500 | -1.82075900 | 1.70629500  |
| H | -5.17376600 | -0.94126100 | 0.01231300  |
| H | -0.70467700 | 2.75888000  | 0.26566700  |
| H | 1.59119200  | 3.69128800  | 0.37569600  |

SCF Done: E(RM062X) = -616.825383810 A.U.

|                                          |                             |
|------------------------------------------|-----------------------------|
| Zero-point correction=                   | 0.217268 (Hartree/Particle) |
| Thermal correction to Energy=            | 0.261661                    |
| Thermal correction to Enthalpy=          | 0.263476                    |
| Thermal correction to Gibbs Free Energy= | 0.120498                    |

SCF Done: E(RB3LYP) = -617.155235568 A.U.

#### TS4

|   |             |             |             |
|---|-------------|-------------|-------------|
| C | 3.21139300  | 2.48638400  | 0.53306100  |
| C | 2.89429700  | 1.45610600  | 1.41490600  |
| C | 2.40916900  | 2.71648900  | -0.58204700 |
| H | 4.08335100  | 3.10406300  | 0.71167900  |
| C | 1.78667300  | 0.65565200  | 1.18305800  |
| H | 3.52354600  | 1.26578400  | 2.27630900  |
| C | 1.30075500  | 1.91767300  | -0.82371700 |
| H | 2.65194900  | 3.51939200  | -1.26827300 |
| C | 0.96792600  | 0.87834100  | 0.06220200  |
| H | 1.54755900  | -0.16373500 | 1.85113600  |
| H | 0.68081900  | 2.08102100  | -1.69762100 |
| C | -0.11246900 | -0.01058700 | -0.23184800 |
| C | -1.42474300 | -0.06206400 | -0.18043900 |
| C | -2.24949800 | 1.05163100  | 0.37368900  |
| C | -3.55310400 | 0.99040800  | 0.43720500  |
| C | -4.77736900 | 0.33668900  | 0.24066100  |
| C | -5.33269700 | -0.47660000 | 1.25710000  |
| C | -5.50906200 | 0.50920400  | -0.95833200 |
| C | -6.55484900 | -1.09594300 | 1.06890300  |
| H | -4.78177600 | -0.60592500 | 2.18061300  |
| C | -6.72989800 | -0.11778500 | -1.12988000 |
| H | -5.09414500 | 1.13728600  | -1.73712300 |
| C | -7.26100900 | -0.92179200 | -0.12136400 |
| H | -6.96431300 | -1.72085300 | 1.85370500  |
| H | -7.27565000 | 0.01829700  | -2.05602000 |
| H | -8.21872300 | -1.40757000 | -0.26128200 |
| H | -1.97729900 | -0.92958000 | -0.53436100 |



|   |             |             |             |
|---|-------------|-------------|-------------|
| H | -1.70012000 | 1.92259600  | 0.72506400  |
| C | 5.24766000  | -1.67108500 | 0.98768200  |
| C | 3.98341600  | -2.09737800 | 0.61147700  |
| C | 3.35412500  | -1.53090400 | -0.50774000 |
| C | 4.02404600  | -0.54644500 | -1.24908400 |
| C | 5.28785100  | -0.12717000 | -0.86356100 |
| C | 5.90237300  | -0.68337600 | 0.25533900  |
| H | 5.72556200  | -2.10900000 | 1.85588800  |
| H | 3.46286600  | -2.85849300 | 1.17978300  |
| H | 3.52761000  | -0.10158000 | -2.10268600 |
| H | 5.79231300  | 0.64474300  | -1.43241900 |
| H | 6.88887000  | -0.35057500 | 0.55473700  |
| C | 2.02241100  | -1.89324700 | -0.85224800 |
| C | 0.82110300  | -1.95159200 | -1.04518500 |
| H | -0.12344000 | -2.32152900 | -1.37815000 |

SCF Done: E(UM062X) = -924.968685785 A.U.

<S\*\*2> = 1.0178

|                                          |                             |
|------------------------------------------|-----------------------------|
| Zero-point correction=                   | 0.315420 (Hartree/Particle) |
| Thermal correction to Energy=            | 0.389144                    |
| Thermal correction to Enthalpy=          | 0.390959                    |
| Thermal correction to Gibbs Free Energy= | 0.169858                    |

SCF Done: E(UB3LYP) = -925.476501327 A.U.

<S\*\*2> = 0.9510

### RAD3

|   |             |             |             |
|---|-------------|-------------|-------------|
| C | -2.34222800 | 2.65276700  | -0.65582500 |
| C | -2.52530000 | 1.58717200  | -1.53230600 |
| C | -1.45949900 | 2.52621900  | 0.41026100  |
| H | -2.88553500 | 3.57820300  | -0.80512200 |
| C | -1.83743700 | 0.39742800  | -1.33525800 |
| H | -3.21483600 | 1.67844600  | -2.36316300 |
| C | -0.77576200 | 1.33172500  | 0.61010500  |
| H | -1.30941400 | 3.35313300  | 1.09428100  |
| C | -0.96389600 | 0.25325500  | -0.25581500 |
| H | -1.99543000 | -0.44048700 | -2.00551300 |
| H | -0.10331000 | 1.21912700  | 1.45387600  |
| C | -0.32027000 | -1.05689500 | 0.03382600  |
| C | 1.01570700  | -1.22743800 | 0.07296800  |
| C | 2.00206000  | -0.19324900 | -0.23462700 |
| C | 3.29411400  | -0.34254600 | -0.07834700 |
| C | 4.66124200  | -0.14117500 | -0.02654100 |
| C | 5.49689200  | -0.49047300 | -1.12241900 |

|   |             |             |             |
|---|-------------|-------------|-------------|
| C | 5.27522000  | 0.38925600  | 1.14119100  |
| C | 6.86292600  | -0.30472200 | -1.04694600 |
| H | 5.04148100  | -0.90071500 | -2.01512800 |
| C | 6.64333400  | 0.56639900  | 1.19365900  |
| H | 4.64919900  | 0.65476000  | 1.98411600  |
| C | 7.44861600  | 0.22270300  | 0.10573500  |
| H | 7.48409400  | -0.57216100 | -1.89378500 |
| H | 7.09306800  | 0.97806500  | 2.08956300  |
| H | 8.52093600  | 0.36404100  | 0.15580400  |
| H | 1.41196200  | -2.20038700 | 0.34966000  |
| H | 1.61955100  | 0.75541600  | -0.61976700 |
| C | -5.70120700 | -0.58028000 | -0.70865600 |
| C | -4.61851900 | -1.43966800 | -0.62970700 |
| C | -3.67363400 | -1.30116200 | 0.40672700  |
| C | -3.87684400 | -0.30134100 | 1.38073200  |
| C | -4.95942200 | 0.55593600  | 1.28550300  |
| C | -5.87362700 | 0.42503600  | 0.24158100  |
| H | -6.41540500 | -0.68979600 | -1.51623500 |
| H | -4.47307600 | -2.21565100 | -1.37212100 |
| H | -3.15119000 | -0.19112800 | 2.17750100  |
| H | -5.08957500 | 1.33735900  | 2.02491400  |
| H | -6.71814000 | 1.09968100  | 0.17155900  |
| C | -2.52191600 | -2.12024100 | 0.45696600  |
| C | -1.20993300 | -2.18801800 | 0.37159100  |
| H | -0.70808100 | -3.13202400 | 0.58314900  |

SCF Done: E(UM062X) = -925.035903775 A.U.

<S\*\*2> = 1.0874

|                                          |                             |
|------------------------------------------|-----------------------------|
| Zero-point correction=                   | 0.319446 (Hartree/Particle) |
| Thermal correction to Energy=            | 0.391859                    |
| Thermal correction to Enthalpy=          | 0.393674                    |
| Thermal correction to Gibbs Free Energy= | 0.181830                    |

SCF Done: E(UB3LYP) = -925.540671920 A.U.

<S\*\*2> = 1.0710

#### TS5

|   |             |             |            |
|---|-------------|-------------|------------|
| C | -0.10861100 | 2.90345800  | 0.06841700 |
| C | 1.23526400  | 2.64550300  | 0.47232800 |
| C | 1.57338800  | 1.45049200  | 1.03560400 |
| C | 0.62067000  | 0.40191100  | 1.23685400 |
| C | -0.71558100 | 0.61844000  | 0.64663600 |
| C | -1.06585000 | 1.94527900  | 0.17744800 |
| C | 0.99567000  | -0.80878200 | 1.84834300 |

|   |             |             |             |
|---|-------------|-------------|-------------|
| C | 0.03919800  | -1.80897100 | 1.82949000  |
| H | -0.36932000 | 3.88255600  | -0.31627700 |
| H | 2.57852100  | 1.25288500  | 1.39316300  |
| H | -0.07783000 | 0.13152700  | -0.49103800 |
| H | -2.08167300 | 2.15353800  | -0.13378700 |
| C | -5.63049100 | -0.17027200 | -0.88883100 |
| C | -4.75331200 | -1.12910500 | -1.38124200 |
| C | -3.46328400 | -1.22232100 | -0.86970400 |
| C | -3.02813700 | -0.35638700 | 0.13767000  |
| C | -3.92490600 | 0.59726900  | 0.63235800  |
| C | -5.21396500 | 0.68836400  | 0.12441400  |
| C | -1.65666600 | -0.48365700 | 0.68859500  |
| C | -1.21675900 | -1.68949400 | 1.18007900  |
| H | -6.63518200 | -0.09484600 | -1.28695600 |
| H | -5.07237100 | -1.80536500 | -2.16552400 |
| H | -2.77920800 | -1.97419200 | -1.24978200 |
| H | -3.60937100 | 1.25362200  | 1.43604700  |
| H | -5.89885700 | 1.42644500  | 0.52511400  |
| H | 1.98213100  | 3.42253400  | 0.35609100  |
| H | -1.90135800 | -2.53382100 | 1.16018400  |
| H | 0.21404500  | -2.73582700 | 2.37534600  |
| C | 4.98779500  | 0.52676500  | -1.00023400 |
| C | 3.70881200  | 0.45016100  | -1.51170500 |
| C | 2.83444600  | -0.55779100 | -1.05860400 |
| C | 3.25302500  | -1.46892000 | -0.07640800 |
| C | 4.54387700  | -1.37234900 | 0.43338100  |
| C | 5.40460700  | -0.38623200 | -0.02509400 |
| H | 5.66437900  | 1.29811200  | -1.34655000 |
| H | 3.35643800  | 1.16053600  | -2.24954900 |
| H | 2.56678100  | -2.21880100 | 0.28704100  |
| H | 4.86394700  | -2.06209200 | 1.20375600  |
| H | 6.40708800  | -0.31548500 | 0.38031900  |
| C | 1.50532000  | -0.58161000 | -1.53050000 |
| C | 0.30710200  | -0.46763200 | -1.76187500 |
| H | -0.59781900 | -0.58602300 | -2.32213600 |

SCF Done: E(RM062X) = -924.981748612 A.U.

Zero-point correction= 0.313829 (Hartree/Particle)  
 Thermal correction to Energy= 0.385506  
 Thermal correction to Enthalpy= 0.387321  
 Thermal correction to Gibbs Free Energy= 0.182202

SCF Done: E(UB3LYP) = -925.486558483 A.U.

<S\*\*2> = 0.0134

**RAD1**

|   |             |             |             |
|---|-------------|-------------|-------------|
| C | -2.07671600 | -2.29976600 | -0.33858400 |
| C | -3.37190400 | -1.74582200 | -0.22042100 |
| C | -3.52671000 | -0.39966500 | -0.03356800 |
| C | -2.39233800 | 0.44648100  | 0.05560900  |
| C | -1.07805900 | -0.10783600 | -0.03100600 |
| C | -0.96306300 | -1.50693200 | -0.24815600 |
| C | -2.48071300 | 1.83562400  | 0.21077800  |
| C | -1.43760700 | 2.69036300  | 0.27525600  |
| H | -1.96514700 | -3.36374800 | -0.51039000 |
| H | -4.51094100 | 0.04694500  | 0.04349000  |
| H | 0.02160400  | -1.94372500 | -0.35911700 |
| C | 4.09139600  | -0.67264900 | 0.00714100  |
| C | 3.66528000  | 0.25765000  | -0.93324000 |
| C | 2.35110400  | 0.71149900  | -0.91999600 |
| C | 1.44473800  | 0.24048600  | 0.03200900  |
| C | 1.88373200  | -0.69383900 | 0.97466900  |
| C | 3.19700500  | -1.14634500 | 0.96240500  |
| C | 0.05336400  | 0.76772500  | 0.06558000  |
| C | -0.13728300 | 2.12377700  | 0.20084500  |
| H | 5.11527900  | -1.02663300 | -0.00192800 |
| H | 4.35545600  | 0.62917500  | -1.68148500 |
| H | 2.01264800  | 1.42854700  | -1.65981200 |
| H | 1.19000800  | -1.05315500 | 1.72722500  |
| H | 3.52586100  | -1.86421600 | 1.70459400  |
| H | -4.24018800 | -2.38999000 | -0.28888600 |
| H | 0.72877500  | 2.77240200  | 0.27782800  |
| H | -1.56670500 | 3.75990800  | 0.39254900  |

SCF Done: E(UM062X) = -616.138862094 A.U.

<S\*\*2> = 0.7657

|                                          |                             |
|------------------------------------------|-----------------------------|
| Zero-point correction=                   | 0.205028 (Hartree/Particle) |
| Thermal correction to Energy=            | 0.248785                    |
| Thermal correction to Enthalpy=          | 0.250600                    |
| Thermal correction to Gibbs Free Energy= | 0.107233                    |

SCF Done: E(UB3LYP) = -616.464225550 A.U.

<S\*\*2> = 0.7593

**RAD2**

|   |             |             |             |
|---|-------------|-------------|-------------|
| H | -3.78707600 | -0.00006300 | 0.92599400  |
| C | 1.56905800  | 1.20777200  | -0.00000700 |

|   |             |             |             |
|---|-------------|-------------|-------------|
| C | 0.19018400  | 1.22249500  | 0.00001800  |
| C | -0.54373300 | 0.00006100  | 0.00003100  |
| C | 0.19010800  | -1.22246000 | 0.00001100  |
| C | 1.56895500  | -1.20784100 | -0.00000400 |
| C | 2.27221400  | -0.00004400 | -0.00001700 |
| H | 2.11109300  | 2.14615200  | -0.00001500 |
| H | -0.35599000 | 2.15746200  | 0.00003900  |
| H | -0.35617900 | -2.15736100 | 0.00001700  |
| H | 2.11095100  | -2.14624300 | -0.00000200 |
| H | 3.35468600  | -0.00009900 | -0.00003300 |
| C | -1.91624500 | 0.00006700  | -0.00001800 |
| C | -3.21226300 | -0.00002400 | -0.00001600 |
| H | -3.78715100 | -0.00000700 | -0.92599200 |

SCF Done: E(UM062X) = -308.906168087 A.U.

<S\*\*2> = 0.7855

|                                          |                             |
|------------------------------------------|-----------------------------|
| Zero-point correction=                   | 0.112889 (Hartree/Particle) |
| Thermal correction to Energy=            | 0.137338                    |
| Thermal correction to Enthalpy=          | 0.139153                    |
| Thermal correction to Gibbs Free Energy= | 0.037725                    |

SCF Done: E(UB3LYP) = -309.081890370 A.U.

<S\*\*2> = 0.7834

### TS6

|   |             |             |             |
|---|-------------|-------------|-------------|
| C | -0.73546500 | 2.45286200  | -0.00002500 |
| C | -1.20506700 | 1.21814200  | 0.00026400  |
| C | 1.20503700  | 1.21810900  | -0.00022800 |
| C | 0.73546700  | 2.45284100  | -0.00026500 |
| H | -1.35817700 | 3.34689700  | -0.00003200 |
| H | 1.35820400  | 3.34686100  | -0.00048500 |
| C | 2.31213200  | 0.33534800  | -0.00018000 |
| C | 2.85475800  | -0.13721600 | -1.21250900 |
| C | 2.85582100  | -0.13579300 | 1.21222400  |
| C | 3.91303000  | -1.03021200 | -1.20592900 |
| H | 2.43115000  | 0.21283200  | -2.14613200 |
| C | 3.91409200  | -1.02879600 | 1.20575400  |
| H | 2.43301000  | 0.21531700  | 2.14581000  |
| C | 4.44727400  | -1.48029700 | -0.00005800 |
| H | 4.32550500  | -1.38051700 | -2.14480900 |
| H | 4.32738800  | -1.37800600 | 2.14468000  |
| H | 5.27362000  | -2.18054100 | -0.00001000 |
| C | -2.31215800 | 0.33538400  | 0.00025300  |
| C | -2.85570200 | -0.13591200 | -1.21216300 |

|   |             |             |             |
|---|-------------|-------------|-------------|
| C | -2.85491800 | -0.13704600 | 1.21257300  |
| C | -3.91392900 | -1.02896300 | -1.20571500 |
| H | -2.43279600 | 0.21511500  | -2.14573400 |
| C | -3.91315300 | -1.03008400 | 1.20596900  |
| H | -2.43145500 | 0.21314400  | 2.14620900  |
| C | -4.44723000 | -1.48034700 | 0.00008500  |
| H | -4.32708800 | -1.37831400 | -2.14465200 |
| H | -4.32574400 | -1.38028100 | 2.14483700  |
| H | -5.27354700 | -2.18062500 | 0.00002700  |

SCF Done: E(UM062X) = -616.619724435 A.U.

<S\*\*2> = 0.7119

|                                          |                             |
|------------------------------------------|-----------------------------|
| Zero-point correction=                   | 0.209763 (Hartree/Particle) |
| Thermal correction to Energy=            | 0.256612                    |
| Thermal correction to Enthalpy=          | 0.258427                    |
| Thermal correction to Gibbs Free Energy= | 0.101097                    |

SCF Done: E(UB3LYP) = -616.961748044 A.U.

<S\*\*2> = 0.5072

### INT3

|   |             |             |             |
|---|-------------|-------------|-------------|
| C | 0.76903500  | 2.69598200  | 0.02814400  |
| C | 0.79457900  | 1.35762500  | 0.02978600  |
| C | -0.79446000 | 1.35757600  | -0.02968100 |
| C | -0.76891600 | 2.69593200  | -0.02799300 |
| H | 1.52826300  | 3.46478500  | -0.00669800 |
| H | -1.52815600 | 3.46473800  | 0.00691300  |
| C | -1.82316100 | 0.33690400  | 0.02685700  |
| C | -1.57030800 | -0.89648600 | 0.64141000  |
| C | -3.09924600 | 0.58157200  | -0.50143700 |
| C | -2.57165900 | -1.85597100 | 0.73018300  |
| H | -0.59166600 | -1.08732400 | 1.06679500  |
| C | -4.09411000 | -0.37842300 | -0.40907300 |
| H | -3.29083100 | 1.52579100  | -0.99884800 |
| C | -3.83365500 | -1.60195600 | 0.20588800  |
| H | -2.36597600 | -2.80341000 | 1.21407800  |
| H | -5.07481400 | -0.18011800 | -0.82529100 |
| H | -4.61170400 | -2.35283400 | 0.27325400  |
| C | 1.82322300  | 0.33689300  | -0.02680300 |
| C | 3.09946700  | 0.58156500  | 0.50110500  |
| C | 1.57011800  | -0.89658200 | -0.64107100 |
| C | 4.09423200  | -0.37851400 | 0.40866100  |
| H | 3.29125400  | 1.52586800  | 0.99828500  |
| C | 2.57137500  | -1.85615900 | -0.72993300 |

|   |            |             |             |
|---|------------|-------------|-------------|
| H | 0.59135400 | -1.08742400 | -1.06617200 |
| C | 3.83352300 | -1.60214400 | -0.20601200 |
| H | 5.07505900 | -0.18020000 | 0.82457900  |
| H | 2.36550100 | -2.80366500 | -1.21361500 |
| H | 4.61150100 | -2.35308900 | -0.27346100 |

SCF Done: E(RM062X) = -616.689371743 A.U.

|                                          |                             |
|------------------------------------------|-----------------------------|
| Zero-point correction=                   | 0.213093 (Hartree/Particle) |
| Thermal correction to Energy=            | 0.259661                    |
| Thermal correction to Enthalpy=          | 0.261476                    |
| Thermal correction to Gibbs Free Energy= | 0.110043                    |

SCF Done: E(RB3LYP) = -617.017529809 A.U.

### TS7

|   |             |             |             |
|---|-------------|-------------|-------------|
| C | 2.20667900  | 1.21367300  | -0.17041000 |
| C | 2.41995500  | 2.58543100  | -0.58846900 |
| H | 3.29550700  | 3.15242300  | -0.87424700 |
| C | 3.03165300  | 0.04928000  | -0.10475200 |
| C | 2.46735800  | -1.24251300 | -0.09284400 |
| C | 4.43550700  | 0.16676000  | -0.09227800 |
| C | 3.27919100  | -2.36413600 | -0.05363800 |
| H | 1.38890600  | -1.34480100 | -0.14486400 |
| C | 5.23835900  | -0.96014600 | -0.04926800 |
| H | 4.88228000  | 1.15472000  | -0.10303000 |
| C | 4.66623800  | -2.23143500 | -0.02676000 |
| H | 2.83110000  | -3.35078600 | -0.05299000 |
| H | 6.31641500  | -0.85155400 | -0.03266400 |
| H | 5.29691400  | -3.11153600 | 0.00427600  |
| C | -0.24614300 | 1.05923700  | 0.87331600  |
| C | -1.53098100 | 1.61484600  | 0.80561800  |
| C | 0.01576600  | 0.09617000  | 1.85611700  |
| C | -2.53014300 | 1.20809900  | 1.67657500  |
| H | -1.74480200 | 2.35085500  | 0.03719300  |
| C | -0.98636600 | -0.30789500 | 2.72931100  |
| H | 1.01260000  | -0.31899100 | 1.94714400  |
| C | -2.26337300 | 0.23804800  | 2.63870700  |
| H | -3.52257200 | 1.63585900  | 1.59523700  |
| H | -0.76802500 | -1.05039600 | 3.48815100  |
| H | -3.04477300 | -0.08764700 | 3.31481300  |
| C | 1.07346200  | 2.87009100  | -0.53501900 |
| H | 0.46806800  | 3.74338900  | -0.72793100 |

|   |             |             |             |
|---|-------------|-------------|-------------|
| C | 0.75580200  | 1.47352900  | -0.10291700 |
| C | -1.01136300 | 0.05290500  | -1.86538600 |
| C | -2.24742900 | -0.46432500 | -1.40817800 |
| C | -2.27257900 | -1.60261900 | -0.58387500 |
| C | -3.45818600 | 0.17721300  | -1.72447300 |
| C | -3.47308300 | -2.06310100 | -0.06839100 |
| H | -1.33924200 | -2.09315300 | -0.33549200 |
| C | -4.65264300 | -0.29424100 | -1.20520300 |
| H | -3.43914200 | 1.04973900  | -2.36639800 |
| C | -4.66601600 | -1.41115900 | -0.37176500 |
| H | -3.47904600 | -2.93134800 | 0.57985400  |
| H | -5.57978300 | 0.21073000  | -1.44921600 |
| H | -5.60220300 | -1.77416300 | 0.03499700  |
| C | 0.09231400  | 0.59632400  | -1.93733900 |
| H | 0.96391400  | 0.85643800  | -2.50689400 |

SCF Done: E(UM062X) = -925.007946726 A.U.

<S\*\*2> = 1.0408

|                                          |                             |
|------------------------------------------|-----------------------------|
| Zero-point correction=                   | 0.315749 (Hartree/Particle) |
| Thermal correction to Energy=            | 0.388260                    |
| Thermal correction to Enthalpy=          | 0.390075                    |
| Thermal correction to Gibbs Free Energy= | 0.180158                    |

SCF Done: E(UB3LYP) = -925.509634581 A.U.

<S\*\*2> = 1.0457

#### INT4

|   |             |             |             |
|---|-------------|-------------|-------------|
| C | -2.12754100 | -0.71719800 | -0.83923500 |
| C | -2.70135300 | -1.75461100 | -1.61750300 |
| H | -3.71952400 | -1.99559700 | -1.89663600 |
| C | -2.57444100 | 0.44698900  | -0.15126900 |
| C | -1.65980200 | 1.24027500  | 0.57323700  |
| C | -3.93096000 | 0.83183300  | -0.16778900 |
| C | -2.09068900 | 2.37335300  | 1.24381600  |
| H | -0.61623500 | 0.94642400  | 0.61173600  |
| C | -4.35022000 | 1.96487900  | 0.50625900  |
| H | -4.64451000 | 0.23159100  | -0.72135100 |
| C | -3.43397200 | 2.74370900  | 1.21396600  |
| H | -1.37629500 | 2.96974300  | 1.79968400  |
| H | -5.39593900 | 2.24863100  | 0.48291600  |
| H | -3.76598800 | 3.63000700  | 1.74073700  |
| C | 0.05267000  | -1.82546800 | 0.09106200  |
| C | 1.33607000  | -2.34452600 | -0.10013200 |
| C | -0.50996800 | -1.88596800 | 1.36488800  |



|   |             |             |             |
|---|-------------|-------------|-------------|
| C | 2.04247000  | -2.90122900 | 0.95706200  |
| H | 1.78143100  | -2.30886500 | -1.08831100 |
| C | 0.19831200  | -2.44240200 | 2.42600900  |
| H | -1.50614700 | -1.49193400 | 1.53133700  |
| C | 1.47610700  | -2.94856100 | 2.22725300  |
| H | 3.03765600  | -3.29707300 | 0.79106300  |
| H | -0.25183900 | -2.47549800 | 3.41113700  |
| H | 2.02804900  | -3.37772000 | 3.05491200  |
| C | -1.49229300 | -2.34022400 | -1.88540100 |
| H | -1.16118900 | -3.21503300 | -2.42740200 |
| C | -0.71650600 | -1.27666700 | -1.09225300 |
| C | 1.09040300  | 0.39182300  | -1.58974300 |
| C | 2.11757100  | 1.05343400  | -0.95113400 |
| C | 1.88516800  | 2.30738500  | -0.31711600 |
| C | 3.43721600  | 0.52256700  | -0.92333000 |
| C | 2.91749300  | 2.97342500  | 0.31188300  |
| H | 0.88639000  | 2.72705500  | -0.34628200 |
| C | 4.45194900  | 1.20697700  | -0.28629900 |
| H | 3.62762700  | -0.42826900 | -1.40560700 |
| C | 4.20527100  | 2.43315500  | 0.33617100  |
| H | 2.72426800  | 3.92670000  | 0.78990900  |
| H | 5.45036100  | 0.78602800  | -0.26945600 |
| H | 5.00866400  | 2.96215600  | 0.83343800  |
| C | 0.07850100  | -0.32261200 | -1.98012600 |
| H | -0.31550300 | -0.22036800 | -2.99348100 |

SCF Done: E(UM062X) = -925.045423526 A.U.

<S\*\*2> = 1.0664

|                                          |                             |
|------------------------------------------|-----------------------------|
| Zero-point correction=                   | 0.319098 (Hartree/Particle) |
| Thermal correction to Energy=            | 0.391019                    |
| Thermal correction to Enthalpy=          | 0.392834                    |
| Thermal correction to Gibbs Free Energy= | 0.183525                    |

SCF Done: E(UB3LYP) = -925.544436915 A.U.

<S\*\*2> = 1.0643

### TS8

|   |             |             |             |
|---|-------------|-------------|-------------|
| C | -1.04239100 | -0.76149400 | 0.88444400  |
| C | -0.32216500 | -0.74871800 | 2.08975300  |
| H | -0.28580800 | -1.41764300 | 2.94022500  |
| C | -1.98150100 | -1.62018100 | 0.23074700  |
| C | -2.47595400 | -1.27977600 | -1.04222300 |
| C | -2.43507300 | -2.80965200 | 0.83246200  |
| C | -3.38197500 | -2.10527200 | -1.69009800 |

|   |             |             |             |
|---|-------------|-------------|-------------|
| H | -2.15035800 | -0.35519000 | -1.50690700 |
| C | -3.34360800 | -3.62509200 | 0.18102400  |
| H | -2.06264900 | -3.08312300 | 1.81343700  |
| C | -3.82056900 | -3.27926600 | -1.08383300 |
| H | -3.75271100 | -1.83031500 | -2.67035800 |
| H | -3.68413700 | -4.53801000 | 0.65540500  |
| H | -4.53132400 | -3.92079000 | -1.59024800 |
| C | -1.20720500 | 1.73999800  | 0.16447400  |
| C | -0.67137300 | 2.84292600  | -0.50334900 |
| C | -2.51900600 | 1.81522300  | 0.63826500  |
| C | -1.42584100 | 3.99523600  | -0.69081500 |
| H | 0.34595300  | 2.79573600  | -0.87608100 |
| C | -3.27366100 | 2.96665600  | 0.44993400  |
| H | -2.95044000 | 0.96292000  | 1.15166900  |
| C | -2.73036200 | 4.06073600  | -0.21509200 |
| H | -0.99362600 | 4.84228500  | -1.21061100 |
| H | -4.29130900 | 3.00743600  | 0.82013400  |
| H | -3.32068200 | 4.95683900  | -0.36468500 |
| C | 0.35567500  | 0.41511800  | 1.77539900  |
| H | 0.99559600  | 1.10946200  | 2.30012600  |
| C | -0.35701300 | 0.51477400  | 0.40966800  |
| C | 1.90802000  | 0.06015300  | -0.16821800 |
| C | 3.28945000  | -0.17589600 | -0.21947300 |
| C | 4.20308000  | 0.89124900  | -0.37772000 |
| C | 3.80189100  | -1.48452900 | -0.06433500 |
| C | 5.56540000  | 0.65048200  | -0.39198100 |
| H | 3.81740200  | 1.89732900  | -0.49056800 |
| C | 5.16654100  | -1.70844700 | -0.08722600 |
| H | 3.10590000  | -2.30390800 | 0.06748300  |
| C | 6.05640100  | -0.64664700 | -0.24842000 |
| H | 6.25393600  | 1.47748100  | -0.51920100 |
| H | 5.54494500  | -2.71784700 | 0.02306600  |
| H | 7.12386100  | -0.82854800 | -0.26111800 |
| C | 0.70687100  | 0.24983200  | -0.63764500 |
| H | 0.44167000  | 0.20139500  | -1.69621300 |

SCF Done: E(UM062X) = -925.044290480 A.U.  
<S\*\*2> = 0.7680

SCF Done: E(UB3LYP) = -925.544922303 A.U.  
<S\*\*2> = 0.6036

#### INT5

|   |            |             |             |
|---|------------|-------------|-------------|
| C | 0.82849000 | -0.83203600 | -0.57749300 |
|---|------------|-------------|-------------|

|   |             |             |             |
|---|-------------|-------------|-------------|
| C | -0.13527100 | -0.96993000 | -1.49852500 |
| H | -0.39003900 | -1.75181100 | -2.20354600 |
| C | 1.95761200  | -1.64014200 | -0.12328800 |
| C | 2.71319900  | -1.23694400 | 0.98104300  |
| C | 2.29547900  | -2.82937700 | -0.77953500 |
| C | 3.77848300  | -2.01249800 | 1.42525400  |
| H | 2.46434700  | -0.30935600 | 1.48581500  |
| C | 3.35828800  | -3.60024900 | -0.33662700 |
| H | 1.71576100  | -3.14403400 | -1.64040300 |
| C | 4.10320800  | -3.19385100 | 0.76901400  |
| H | 4.35732600  | -1.69204000 | 2.28338400  |
| H | 3.60986300  | -4.51988300 | -0.85134700 |
| H | 4.93486000  | -3.79660500 | 1.11384000  |
| C | 1.16291700  | 1.71774600  | -0.06247600 |
| C | 0.79759400  | 2.86731300  | 0.64269900  |
| C | 2.33619000  | 1.74424100  | -0.82261900 |
| C | 1.57706100  | 4.01647600  | 0.58146900  |
| H | -0.10957900 | 2.85996300  | 1.23667100  |
| C | 3.11493600  | 2.89351700  | -0.88362700 |
| H | 2.63998300  | 0.85741900  | -1.36788500 |
| C | 2.73884300  | 4.03408200  | -0.18217500 |
| H | 1.27734600  | 4.89925800  | 1.13428400  |
| H | 4.02130200  | 2.89577800  | -1.47783900 |
| H | 3.34894800  | 4.92842900  | -0.22610600 |
| C | -0.85316200 | 0.30844300  | -1.10859300 |
| H | -1.02784600 | 1.08479800  | -1.85319400 |
| C | 0.29125300  | 0.50035100  | -0.03961700 |
| C | -1.79606300 | 0.20641400  | 0.08679500  |
| C | -3.22472900 | -0.09191300 | 0.12458200  |
| C | -3.89996700 | -0.39529800 | -1.05975300 |
| C | -3.93602700 | -0.09172400 | 1.32967300  |
| C | -5.25609600 | -0.69991200 | -1.04201900 |
| H | -3.35275900 | -0.39159100 | -1.99667600 |
| C | -5.28913400 | -0.39190700 | 1.34668100  |
| H | -3.41852600 | 0.14862600  | 2.25176100  |
| C | -5.95317900 | -0.69848400 | 0.16025100  |
| H | -5.76900300 | -0.93624800 | -1.96665800 |
| H | -5.83160100 | -0.38819100 | 2.28458700  |
| H | -7.01087200 | -0.93282700 | 0.17529300  |
| C | -0.82194500 | 0.37017400  | 0.99258600  |
| H | -0.78739500 | 0.34135900  | 2.07583200  |

SCF Done: E(RM062X) = -925.129130739 A.U.

|                                          |                             |
|------------------------------------------|-----------------------------|
| Zero-point correction=                   | 0.324246 (Hartree/Particle) |
| Thermal correction to Energy=            | 0.393842                    |
| Thermal correction to Enthalpy=          | 0.395658                    |
| Thermal correction to Gibbs Free Energy= | 0.191683                    |

SCF Done: E(RB3LYP) = -925.614422382 A.U.

### TS9

|   |             |             |             |
|---|-------------|-------------|-------------|
| C | 1.44522800  | -0.22196000 | -0.48029200 |
| C | 0.65860600  | -0.30686700 | -1.64330800 |
| H | 1.04718600  | -0.66174000 | -2.59466700 |
| C | 2.56005600  | -1.06790100 | -0.09663600 |
| C | 3.29610100  | -0.75697200 | 1.05701100  |
| C | 2.94183600  | -2.18761300 | -0.85362300 |
| C | 4.36841600  | -1.54740500 | 1.44892400  |
| H | 3.02807900  | 0.12631100  | 1.62790500  |
| C | 4.03003000  | -2.95585800 | -0.47427100 |
| H | 2.35933100  | -2.46427300 | -1.72464900 |
| C | 4.74506500  | -2.64407200 | 0.68148700  |
| H | 4.92200700  | -1.29677000 | 2.34611100  |
| H | 4.31342000  | -3.81641100 | -1.06900900 |
| H | 5.58919900  | -3.25399400 | 0.97979000  |
| C | 0.45313000  | 1.99996300  | 0.14397500  |
| C | -0.58396600 | 2.74109500  | 0.73860700  |
| C | 1.44043800  | 2.69058300  | -0.58004500 |
| C | -0.67741100 | 4.10671600  | 0.53684200  |
| H | -1.31393100 | 2.22695500  | 1.35159200  |
| C | 1.34187200  | 4.05916300  | -0.77944400 |
| H | 2.28273800  | 2.13831700  | -0.97921600 |
| C | 0.27861500  | 4.77048200  | -0.23193200 |
| H | -1.48893500 | 4.66340600  | 0.99022500  |
| H | 2.10528900  | 4.57707100  | -1.34763200 |
| H | 0.21019400  | 5.84223500  | -0.37612000 |
| C | -0.73790100 | -0.18181100 | -1.45946800 |
| H | -1.37997100 | -0.20012200 | -2.33524900 |
| C | 0.61150000  | 0.57132500  | 0.40284100  |
| C | -1.35909600 | -0.32333800 | -0.16058900 |
| C | -2.72558500 | -0.87059400 | -0.02152400 |
| C | -3.29142900 | -1.70321100 | -0.99402300 |
| C | -3.47637000 | -0.57623200 | 1.12093900  |
| C | -4.57061200 | -2.21698600 | -0.82983200 |
| H | -2.71220800 | -1.97455200 | -1.86906500 |
| C | -4.75139300 | -1.10126400 | 1.29196000  |

|   |             |             |             |
|---|-------------|-------------|-------------|
| H | -3.05215400 | 0.08534400  | 1.86845600  |
| C | -5.30530700 | -1.91972700 | 0.31426200  |
| H | -4.99078700 | -2.86487400 | -1.59015600 |
| H | -5.31753700 | -0.86102000 | 2.18427300  |
| H | -6.30185700 | -2.32528300 | 0.44185000  |
| C | -0.49259000 | -0.20049700 | 0.92309100  |
| H | -0.49547200 | -0.88271900 | 1.76585600  |

SCF Done: E(RM062X) = -925.080170547 A.U.

Zero-point correction= 0.322047 (Hartree/Particle)  
 Thermal correction to Energy= 0.390936  
 Thermal correction to Enthalpy= 0.392751  
 Thermal correction to Gibbs Free Energy= 0.193721

SCF Done: E(RB3LYP) = -925.580585446 A.U.

**P2**

|   |             |             |             |
|---|-------------|-------------|-------------|
| C | 0.73870200  | -1.06294300 | 0.00112900  |
| C | 0.24765400  | 0.25527900  | -0.00982300 |
| C | 1.14138400  | 1.44571900  | -0.03736900 |
| C | 2.15665000  | 1.56815800  | -0.98979100 |
| C | 0.95520600  | 2.47804900  | 0.88424600  |
| C | 2.96757500  | 2.69478000  | -1.01420600 |
| H | 2.30734100  | 0.77408500  | -1.71238400 |
| C | 1.77108200  | 3.60395100  | 0.86340200  |
| H | 0.17643800  | 2.38441500  | 1.63358100  |
| C | 2.78022500  | 3.71466200  | -0.08558300 |
| H | 3.74828100  | 2.77820900  | -1.76099100 |
| H | 1.61981200  | 4.39182400  | 1.59183500  |
| H | 3.41722400  | 4.59098300  | -0.10343700 |
| C | 2.19075200  | -1.38395700 | 0.05432700  |
| C | 2.73669900  | -2.29864600 | -0.84912100 |
| C | 3.02575000  | -0.80827800 | 1.01595300  |
| C | 4.08760900  | -2.62466200 | -0.80056600 |
| H | 2.09695600  | -2.74162000 | -1.60488000 |
| C | 4.37309100  | -1.13792600 | 1.06799100  |
| H | 2.61216700  | -0.09946600 | 1.72456500  |
| C | 4.90963300  | -2.04450800 | 0.15783600  |
| H | 4.49713200  | -3.32999000 | -1.51423700 |
| H | 5.00725200  | -0.68635900 | 1.82160200  |
| H | 5.96262200  | -2.29675500 | 0.19739700  |
| C | -0.17899700 | -2.11687400 | -0.00806000 |

|   |             |             |             |
|---|-------------|-------------|-------------|
| H | 0.19676200  | -3.13386800 | 0.01310600  |
| C | -1.54646200 | -1.89090800 | -0.01599600 |
| H | -2.23239600 | -2.73000300 | -0.04021800 |
| C | -1.13228000 | 0.46631900  | -0.01294500 |
| H | -1.49921400 | 1.48739800  | -0.01816400 |
| C | -2.04574100 | -0.58714000 | -0.01462700 |
| C | -3.50626000 | -0.32732600 | -0.02490500 |
| C | -4.37447000 | -1.10909400 | 0.74261200  |
| C | -4.04419900 | 0.70164900  | -0.80297000 |
| C | -5.74268600 | -0.86900800 | 0.73222200  |
| H | -3.96861800 | -1.89355300 | 1.37151300  |
| C | -5.41231500 | 0.94207900  | -0.81311400 |
| H | -3.38678200 | 1.29983700  | -1.42404400 |
| C | -6.26672900 | 0.15757700  | -0.04590900 |
| H | -6.39957800 | -1.47970500 | 1.34047700  |
| H | -5.81298400 | 1.73785400  | -1.42976600 |
| H | -7.33364300 | 0.34498900  | -0.05435000 |

SCF Done: E(RM062X) = -925.240360664 A.U.

|                                          |                             |
|------------------------------------------|-----------------------------|
| Zero-point correction=                   | 0.326744 (Hartree/Particle) |
| Thermal correction to Energy=            | 0.395544                    |
| Thermal correction to Enthalpy=          | 0.397359                    |
| Thermal correction to Gibbs Free Energy= | 0.198351                    |

SCF Done: E(RB3LYP) = -925.733576603 A.U.

### TS1-2

|   |             |             |             |
|---|-------------|-------------|-------------|
| C | 3.88086500  | 0.02665900  | -0.96150700 |
| C | 3.83930000  | -1.34129600 | -0.69925500 |
| C | 2.94554700  | 0.87676600  | -0.39676700 |
| H | 4.64397100  | 0.42944800  | -1.61663200 |
| C | 2.85281100  | -1.85753500 | 0.13917000  |
| H | 4.57131300  | -2.00269400 | -1.14631200 |
| C | 1.94802200  | 0.36536400  | 0.45724500  |
| H | 2.96593600  | 1.93982200  | -0.60203300 |
| C | 1.91898200  | -1.01872100 | 0.72200700  |
| H | 2.81610700  | -2.92137100 | 0.34049100  |
| C | 1.00007200  | 1.22358100  | 1.04194500  |
| H | 1.15076100  | -1.41390000 | 1.37535900  |
| C | -0.02220100 | 1.92559800  | 1.23076500  |
| C | -1.26207700 | 1.80890500  | -0.03463200 |
| C | -1.36216100 | 2.87151300  | -0.71254000 |

|   |             |             |             |
|---|-------------|-------------|-------------|
| C | -1.94409100 | 0.50090300  | -0.04216800 |
| C | -2.73156700 | 0.17277700  | -1.15396000 |
| C | -1.85899900 | -0.41172200 | 1.01109200  |
| C | -3.40856400 | -1.03516200 | -1.20902900 |
| H | -2.79717100 | 0.88190200  | -1.97008600 |
| C | -2.54470000 | -1.62084600 | 0.95451300  |
| H | -1.26133900 | -0.17444100 | 1.88119400  |
| C | -3.31836200 | -1.93921800 | -0.15377000 |
| H | -4.00755000 | -1.27485400 | -2.07973700 |
| H | -2.47290300 | -2.31449000 | 1.78393300  |
| H | -3.84775300 | -2.88340600 | -0.19755800 |
| H | -0.97316400 | 3.84947100  | -0.91606600 |
| H | -0.38546600 | 2.59912600  | 1.98879300  |

SCF Done: E(UM062X) = -616.608446409 A.U.

<S\*\*2> = 0.4126

|                                          |                             |
|------------------------------------------|-----------------------------|
| Zero-point correction=                   | 0.207669 (Hartree/Particle) |
| Thermal correction to Energy=            | 0.255857                    |
| Thermal correction to Enthalpy=          | 0.257672                    |
| Thermal correction to Gibbs Free Energy= | 0.098355                    |

SCF Done: E(UB3LYP) = -616.948492675 A.U.

<S\*\*2> = 0.3235

### TS1-3

|   |             |             |             |
|---|-------------|-------------|-------------|
| C | 2.67191500  | -1.44413400 | -1.16224800 |
| C | 3.87493700  | -1.36822200 | -0.47244400 |
| C | 1.62355800  | -0.58639600 | -0.84721800 |
| H | 2.54372700  | -2.17434700 | -1.95228100 |
| C | 4.02650000  | -0.42876200 | 0.54446500  |
| H | 4.69113900  | -2.03463300 | -0.72409300 |
| C | 1.76731000  | 0.35634900  | 0.17299600  |
| H | 0.69237200  | -0.65056100 | -1.39540600 |
| C | 2.98254000  | 0.42334000  | 0.86746700  |
| H | 4.96220900  | -0.36030400 | 1.08651700  |
| C | 0.68074000  | 1.26436400  | 0.57841700  |
| H | 3.09032700  | 1.15499200  | 1.65914200  |
| C | 0.44388600  | 2.00444500  | 1.57497300  |
| C | -0.68076400 | 1.26439400  | -0.57836200 |
| C | -0.44390100 | 2.00458000  | -1.57481800 |
| C | -1.76731200 | 0.35633100  | -0.17299900 |
| C | -2.98257200 | 0.42338900  | -0.86741200 |
| C | -1.62351100 | -0.58649700 | 0.84712300  |
| C | -4.02652300 | -0.42873100 | -0.54442700 |

|   |             |             |             |
|---|-------------|-------------|-------------|
| H | -3.09038500 | 1.15510300  | -1.65902300 |
| C | -2.67185800 | -1.44425300 | 1.16213500  |
| H | -0.69229800 | -0.65070100 | 1.39526000  |
| C | -3.87491500 | -1.36827100 | 0.47239900  |
| H | -4.96225700 | -0.36022900 | -1.08643100 |
| H | -2.54363500 | -2.17453200 | 1.95209700  |
| H | -4.69111100 | -2.03469500 | 0.72403700  |
| H | 0.19247800  | 2.73927400  | -2.02651700 |
| H | -0.19274500 | 2.73909000  | 2.02641600  |

SCF Done: E(UM062X) = -616.597664847 A.U.

<S\*\*2> = 0.4746

|                                          |                             |
|------------------------------------------|-----------------------------|
| Zero-point correction=                   | 0.207215 (Hartree/Particle) |
| Thermal correction to Energy=            | 0.255625                    |
| Thermal correction to Enthalpy=          | 0.257440                    |
| Thermal correction to Gibbs Free Energy= | 0.100142                    |

SCF Done: E(UB3LYP) = -616.935634829 A.U.

<S\*\*2> = 0.3678

### TS1\_con1

|   |             |             |             |
|---|-------------|-------------|-------------|
| C | -0.02493900 | 2.34726100  | 0.37541400  |
| C | -0.96616100 | 2.40910600  | -0.66337500 |
| C | -2.02564500 | 1.52865200  | -0.70151100 |
| C | -2.16024300 | 0.53912200  | 0.30010700  |
| C | -1.21463700 | 0.49960500  | 1.34857400  |
| C | -0.16876300 | 1.41309000  | 1.39051700  |
| C | -3.06343400 | -0.52473400 | 0.20007700  |
| C | -2.92392600 | -1.76252400 | -0.06403700 |
| H | 0.80875500  | 3.03904000  | 0.38891500  |
| H | -2.75122300 | 1.56201000  | -1.50507700 |
| H | -1.32467400 | -0.25493900 | 2.11823700  |
| H | 0.55879900  | 1.36578700  | 2.19206000  |
| C | 3.49409700  | 0.13507700  | -0.09270100 |
| C | 3.08685900  | -0.80777300 | 0.85455000  |
| C | 1.84797700  | -1.41083000 | 0.75685800  |
| C | 0.97327200  | -1.07334100 | -0.29953200 |
| C | 1.38471000  | -0.10531200 | -1.23732400 |
| C | 2.64019100  | 0.47785900  | -1.13449800 |
| C | -0.28340400 | -1.68635400 | -0.41534900 |
| C | -1.38020400 | -2.27808300 | -0.58876100 |
| H | 4.47038600  | 0.59749000  | -0.01336700 |
| H | 3.74977500  | -1.07621600 | 1.66857500  |
| H | 1.52981800  | -2.14673500 | 1.48536500  |



|   |             |             |             |
|---|-------------|-------------|-------------|
| H | 0.70648500  | 0.17121700  | -2.03507600 |
| H | 2.94815600  | 1.21232800  | -1.86955700 |
| H | -0.85152000 | 3.14821700  | -1.44789800 |
| H | -1.56176100 | -3.20342600 | -1.11897800 |
| H | -3.57750200 | -2.61970300 | -0.03724600 |

SCF Done: E(RM062X) = -616.618555116 A.U.

|                                          |                             |
|------------------------------------------|-----------------------------|
| Zero-point correction=                   | 0.209168 (Hartree/Particle) |
| Thermal correction to Energy=            | 0.256382                    |
| Thermal correction to Enthalpy=          | 0.258197                    |
| Thermal correction to Gibbs Free Energy= | 0.105519                    |

SCF Done: E(RB3LYP) = -616.961157306 A.U.

### TS1\_con2

|   |             |             |             |
|---|-------------|-------------|-------------|
| C | -4.15950400 | 0.73504400  | -0.86153800 |
| C | -3.92579700 | -0.63065900 | -1.15482400 |
| C | -3.01041200 | -1.35181900 | -0.43550700 |
| C | -2.26739400 | -0.72483600 | 0.59721700  |
| C | -2.43444400 | 0.66498000  | 0.82756300  |
| C | -3.44791200 | 1.36427900  | 0.12589200  |
| C | -1.18023000 | -1.29672400 | 1.24247000  |
| C | 0.03076300  | -1.01015700 | 1.38666500  |
| H | -4.92270200 | 1.27392400  | -1.41049200 |
| H | -2.83659900 | -2.40083200 | -0.64072100 |
| H | -1.99271700 | 1.10508200  | 1.71172300  |
| H | -3.65186300 | 2.39984200  | 0.37409600  |
| C | 4.70115300  | -0.12263400 | -0.47859900 |
| C | 3.82971600  | -1.19686800 | -0.62162500 |
| C | 2.47186200  | -1.03446700 | -0.37631800 |
| C | 1.96659500  | 0.21521700  | -0.00978900 |
| C | 2.84650900  | 1.29206700  | 0.13014000  |
| C | 4.20568600  | 1.12032700  | -0.09818600 |
| C | 0.52730800  | 0.41840100  | 0.20978900  |
| C | -0.37559700 | 1.21750700  | -0.11676900 |
| H | 5.76097300  | -0.25375000 | -0.66073700 |
| H | 4.20752900  | -2.16700000 | -0.92173700 |
| H | 1.78941900  | -1.87029600 | -0.47893600 |
| H | 2.45283000  | 2.25804600  | 0.42229100  |
| H | 4.87977900  | 1.96054800  | 0.01874000  |
| H | -4.48769000 | -1.10943000 | -1.94791500 |
| H | -0.78545200 | 2.06127000  | -0.62550100 |

H 0.91667500 -1.21535400 1.95970800

SCF Done: E(RM062X) = -616.603923176 A.U.

Zero-point correction= 0.209371 (Hartree/Particle)

Thermal correction to Energy= 0.256690

Thermal correction to Enthalpy= 0.258505

Thermal correction to Gibbs Free Energy= 0.105800

SCF Done: E(RB3LYP) = -616.938737741 A.U.

### TS-St

|   |             |             |             |
|---|-------------|-------------|-------------|
| C | 5.84613800  | 0.07236700  | -0.40015900 |
| C | 5.11773600  | 1.25958500  | -0.36635500 |
| C | 5.19282900  | -1.14568400 | -0.23323600 |
| H | 6.91711600  | 0.09646800  | -0.56041100 |
| C | 3.74669400  | 1.23305900  | -0.16790600 |
| H | 5.62261400  | 2.20922400  | -0.49810400 |
| C | 3.82130300  | -1.18310900 | -0.03145800 |
| H | 5.75646300  | -2.07077100 | -0.26003100 |
| C | 3.07920700  | 0.01001100  | 0.01788800  |
| H | 3.17317000  | 2.15209000  | -0.14848200 |
| H | 3.30704900  | -2.12831000 | 0.09488200  |
| C | 1.65690100  | -0.02248500 | 0.20243700  |
| C | 0.74842100  | -0.20706700 | 1.16539100  |
| C | -0.51220800 | -0.11523100 | 0.46867000  |
| C | -1.77673800 | -0.12049700 | 0.47521600  |
| C | -3.13901100 | -0.04744200 | 0.14777000  |
| C | -3.81035000 | 1.19422100  | 0.16059900  |
| C | -3.87025500 | -1.21099300 | -0.17470500 |
| C | -5.15812800 | 1.26333300  | -0.14445800 |
| H | -3.25119800 | 2.08709200  | 0.41156900  |
| C | -5.21818600 | -1.12677700 | -0.47654800 |
| H | -3.35766200 | -2.16487500 | -0.18180400 |
| C | -5.86787100 | 0.10647700  | -0.46346900 |
| H | -5.66228900 | 2.22218900  | -0.13502300 |
| H | -5.76928200 | -2.02581400 | -0.72524300 |
| H | -6.92323900 | 0.16548500  | -0.70004900 |
| H | 0.90527500  | -0.37388800 | 2.22924100  |
| H | 0.14308600  | 0.07248400  | -0.60461000 |

SCF Done: E(UM062X) = -616.587903108 A.U.

<S\*\*2> = 0.5692

|                                          |                             |
|------------------------------------------|-----------------------------|
| Zero-point correction=                   | 0.206232 (Hartree/Particle) |
| Thermal correction to Energy=            | 0.253712                    |
| Thermal correction to Enthalpy=          | 0.255528                    |
| Thermal correction to Gibbs Free Energy= | 0.096800                    |

SCF Done: E(UB3LYP) = -616.931280186 A.U.  
 <S\*\*2> = 0.4401

**TS4-2**

|   |             |             |             |
|---|-------------|-------------|-------------|
| C | -3.26300000 | 2.76161300  | 0.73630100  |
| C | -2.60503300 | 3.02597100  | -0.46394000 |
| C | -2.81314900 | 1.73304200  | 1.55824200  |
| H | -4.12286900 | 3.35376400  | 1.02632100  |
| C | -1.51095400 | 2.26452300  | -0.84495300 |
| H | -2.95058000 | 3.82758000  | -1.10637300 |
| C | -1.71520700 | 0.96989000  | 1.18708900  |
| H | -3.32755800 | 1.51561700  | 2.48682200  |
| C | -1.03956100 | 1.23211500  | -0.01670900 |
| H | -1.00645800 | 2.45572400  | -1.78489500 |
| H | -1.37349000 | 0.15490300  | 1.81432100  |
| C | 0.03374900  | 0.38254100  | -0.43634300 |
| C | 1.32328800  | 0.21708900  | -0.22853000 |
| C | 2.14414100  | -0.89345200 | -0.75848600 |
| C | 3.44114500  | -0.96877000 | -0.59946800 |
| C | 4.69066600  | -0.54620100 | -0.14145200 |
| C | 5.17314500  | -0.95744700 | 1.12551100  |
| C | 5.52645600  | 0.26445100  | -0.94886000 |
| C | 6.42385800  | -0.56068400 | 1.56068500  |
| H | 4.54330800  | -1.58372500 | 1.74560500  |
| C | 6.77385500  | 0.65179500  | -0.49635900 |
| H | 5.16786900  | 0.57812800  | -1.92148300 |
| C | 7.23211200  | 0.24411400  | 0.75678600  |
| H | 6.77620500  | -0.87862800 | 2.53479500  |
| H | 7.39853200  | 1.27833100  | -1.12227100 |
| H | 8.21111600  | 0.55059200  | 1.10349200  |
| H | 1.85890200  | 0.94533400  | 0.38484100  |
| H | 1.61421400  | -1.68762500 | -1.28060000 |
| C | -5.36316400 | -0.30376200 | -0.04434100 |
| C | -4.22539400 | -0.32342600 | -0.83541700 |
| C | -3.27095200 | -1.33818900 | -0.66668000 |
| C | -3.48561800 | -2.33337800 | 0.29929600  |
| C | -4.62591700 | -2.30172000 | 1.08697700  |
| C | -5.56648800 | -1.28807000 | 0.92003200  |
| H | -6.08996100 | 0.48968000  | -0.17199700 |

|   |             |             |             |
|---|-------------|-------------|-------------|
| H | -4.04425500 | 0.45509500  | -1.56678000 |
| H | -2.74442900 | -3.11273600 | 0.42724100  |
| H | -4.78200200 | -3.06885100 | 1.83610600  |
| H | -6.45553200 | -1.26679700 | 1.53892000  |
| C | -2.07033400 | -1.31502700 | -1.42570000 |
| C | -0.96175800 | -1.09790300 | -1.88505700 |
| H | -0.14832200 | -1.12107400 | -2.57579700 |

SCF Done: E(UM062X) = -924.964743270 A.U.

<S\*\*2> = 1.0715

|                                          |                             |
|------------------------------------------|-----------------------------|
| Zero-point correction=                   | 0.315802 (Hartree/Particle) |
| Thermal correction to Energy=            | 0.389267                    |
| Thermal correction to Enthalpy=          | 0.391082                    |
| Thermal correction to Gibbs Free Energy= | 0.173473                    |

SCF Done: E(UB3LYP) = -925.472212481 A.U.

<S\*\*2> = 1.0450

### TS4-3

|   |             |             |             |
|---|-------------|-------------|-------------|
| C | -3.67104500 | 2.97903200  | -0.80574100 |
| C | -3.38249600 | 1.80168800  | -1.49129400 |
| C | -2.90536600 | 3.34174700  | 0.30017300  |
| H | -4.48996500 | 3.61000900  | -1.12955300 |
| C | -2.33868400 | 0.98742000  | -1.07832800 |
| H | -3.97795200 | 1.51367500  | -2.34979100 |
| C | -1.85871700 | 2.53531900  | 0.72024700  |
| H | -3.12694400 | 4.25718000  | 0.83598900  |
| C | -1.55198200 | 1.34953600  | 0.02998800  |
| H | -2.12312700 | 0.06047000  | -1.59845200 |
| H | -1.26382500 | 2.80706800  | 1.58455000  |
| C | -0.50359800 | 0.49217400  | 0.50223400  |
| C | 0.79970300  | 0.36644000  | 0.35387600  |
| C | 1.58992800  | 1.23900200  | -0.55567300 |
| C | 2.88040100  | 1.09540200  | -0.71376600 |
| C | 4.09146600  | 0.43693000  | -0.45642600 |
| C | 4.49644000  | -0.66305200 | -1.24898700 |
| C | 4.95652100  | 0.88003600  | 0.57132700  |
| C | 5.70277600  | -1.29488800 | -1.00679500 |
| H | 3.84277400  | -1.00200600 | -2.04339000 |
| C | 6.15878800  | 0.23582100  | 0.80121000  |
| H | 4.65818700  | 1.72831900  | 1.17535600  |
| C | 6.54057500  | -0.85235500 | 0.01650700  |
| H | 5.99566600  | -2.14099700 | -1.61730700 |
| H | 6.80759900  | 0.58180000  | 1.59713700  |

|   |             |             |             |
|---|-------------|-------------|-------------|
| H | 7.48475800  | -1.35012000 | 0.19984000  |
| H | 1.35080100  | -0.39547200 | 0.89914700  |
| H | 1.03562800  | 2.01277000  | -1.08375700 |
| C | -4.47059600 | -1.85777900 | -0.00709300 |
| C | -3.59911800 | -1.31042300 | 0.92749000  |
| C | -2.23813800 | -1.61277800 | 0.87209100  |
| C | -1.75724000 | -2.46189300 | -0.12772100 |
| C | -2.63330900 | -3.01066200 | -1.05377500 |
| C | -3.99155300 | -2.70688300 | -0.99797400 |
| H | -5.52540500 | -1.61450300 | 0.03731800  |
| H | -3.96050500 | -0.63482700 | 1.69334200  |
| H | -0.69565500 | -2.67321700 | -0.17559000 |
| H | -2.25586600 | -3.67384800 | -1.82293900 |
| H | -4.67308100 | -3.13080800 | -1.72582000 |
| C | -1.32117100 | -1.00159600 | 1.81931900  |
| C | -0.80195300 | -0.86589300 | 2.92119500  |
| H | -0.23288500 | -0.56955100 | 3.77142200  |

SCF Done: E(UM062X) = -924.960632211 A.U.

<S\*\*2> = 1.0318

|                                          |                             |
|------------------------------------------|-----------------------------|
| Zero-point correction=                   | 0.315481 (Hartree/Particle) |
| Thermal correction to Energy=            | 0.389115                    |
| Thermal correction to Enthalpy=          | 0.390930                    |
| Thermal correction to Gibbs Free Energy= | 0.171267                    |

SCF Done: E(UB3LYP) = -925.467885494 A.U.

<S\*\*2> = 0.9810

#### TS4-4

|   |             |             |             |
|---|-------------|-------------|-------------|
| C | -3.77492700 | 2.76917900  | -1.24758700 |
| C | -3.13759000 | 1.73154800  | -1.92224800 |
| C | -3.32831900 | 3.15038100  | 0.01605100  |
| H | -4.61833800 | 3.27569800  | -1.70119700 |
| C | -2.06122100 | 1.07737100  | -1.34159600 |
| H | -3.48589700 | 1.42489700  | -2.90139800 |
| C | -2.25344400 | 2.50122100  | 0.60448000  |
| H | -3.82375300 | 3.95667000  | 0.54444400  |
| C | -1.59470400 | 1.46219500  | -0.07350000 |
| H | -1.57720100 | 0.24987500  | -1.84844900 |
| H | -1.91113500 | 2.78370600  | 1.59318900  |
| C | -0.53769000 | 0.71902800  | 0.55316800  |
| C | 0.77097600  | 0.60254700  | 0.43919900  |
| C | 1.62007000  | -0.35974500 | 1.17299100  |
| C | 2.89872800  | -0.51070300 | 0.93372800  |

|   |             |             |             |
|---|-------------|-------------|-------------|
| C | 4.09569600  | -0.23768100 | 0.26472600  |
| C | 5.00885200  | 0.72293600  | 0.76355300  |
| C | 4.44430400  | -0.95068200 | -0.90834900 |
| C | 6.20077900  | 0.96361600  | 0.10525900  |
| H | 4.75378300  | 1.26725800  | 1.66452200  |
| C | 5.64040800  | -0.69659800 | -1.55344700 |
| H | 3.75423800  | -1.69214200 | -1.29230000 |
| C | 6.52573700  | 0.25905800  | -1.05410700 |
| H | 6.88627800  | 1.70672500  | 0.49543400  |
| H | 5.88905000  | -1.24503400 | -2.45437000 |
| H | 7.46192700  | 0.45179600  | -1.56310800 |
| H | 1.29383500  | 1.24920600  | -0.26851900 |
| H | 1.12437800  | -0.96248600 | 1.93094600  |
| C | -4.27421200 | -1.82628100 | -0.37707600 |
| C | -3.60743100 | -1.15028100 | 0.63799700  |
| C | -2.25082000 | -1.39021900 | 0.86005200  |
| C | -1.56547100 | -2.30137700 | 0.05332700  |
| C | -2.23938700 | -2.97893400 | -0.95328500 |
| C | -3.59409400 | -2.74117900 | -1.17229700 |
| H | -5.32549000 | -1.63025100 | -0.55036000 |
| H | -4.12305600 | -0.42080500 | 1.25087900  |
| H | -0.50542600 | -2.46143800 | 0.21472800  |
| H | -1.70545800 | -3.68982100 | -1.57242900 |
| H | -4.11537700 | -3.26555600 | -1.96437900 |
| C | -1.54786500 | -0.64354300 | 1.89126600  |
| C | -1.28276000 | -0.35003300 | 3.05216800  |
| H | -0.90604600 | 0.07075500  | 3.95552600  |

SCF Done: E(UM062X) = -924.958554917 A.U.

<S\*\*2> = 1.0706

|                                          |                             |
|------------------------------------------|-----------------------------|
| Zero-point correction=                   | 0.315002 (Hartree/Particle) |
| Thermal correction to Energy=            | 0.388839                    |
| Thermal correction to Enthalpy=          | 0.390654                    |
| Thermal correction to Gibbs Free Energy= | 0.170465                    |

SCF Done: E(UB3LYP) = -925.465636809 A.U.

<S\*\*2> = 1.0439

### TS7-2

|   |            |             |             |
|---|------------|-------------|-------------|
| C | 0.77782200 | -0.16221600 | -0.78075900 |
| C | 2.03447200 | -0.99727200 | -0.63511400 |
| C | 1.39944200 | -2.07288200 | -1.15686100 |
| H | 1.67053500 | -3.10323200 | -1.34040500 |
| C | 3.35959200 | -0.77576000 | -0.06719700 |

|   |             |             |             |
|---|-------------|-------------|-------------|
| C | 3.53200500  | 0.10024900  | 1.01092500  |
| C | 4.47007400  | -1.46727400 | -0.56452600 |
| C | 4.78743400  | 0.27716100  | 1.57828000  |
| H | 2.67130200  | 0.62347800  | 1.41235700  |
| C | 5.72278300  | -1.28662900 | 0.00388900  |
| H | 4.34169400  | -2.13334100 | -1.41039900 |
| C | 5.88572100  | -0.41240900 | 1.07535200  |
| H | 4.90782700  | 0.95368800  | 2.41594000  |
| H | 6.57703400  | -1.82175000 | -0.39349100 |
| H | 6.86553100  | -0.26910300 | 1.51511800  |
| C | 0.39579300  | 1.20874600  | -0.63135500 |
| C | -0.97304400 | 1.54346800  | -0.65934600 |
| C | 1.33629200  | 2.24217300  | -0.46874400 |
| C | -1.38064600 | 2.85729200  | -0.50654200 |
| H | -1.70834700 | 0.75658900  | -0.78989200 |
| C | 0.91813100  | 3.55697800  | -0.32707400 |
| H | 2.39391000  | 2.00731400  | -0.48152200 |
| C | -0.43830400 | 3.87210800  | -0.33755400 |
| H | -2.43860500 | 3.09396700  | -0.52214900 |
| H | 1.65518600  | 4.34307100  | -0.21156600 |
| H | -0.75985700 | 4.89998700  | -0.22235300 |
| C | 0.08393500  | -1.28941500 | -1.23851200 |
| H | -0.71987000 | -1.35403900 | -1.95969300 |
| C | -2.14769500 | -1.68594300 | 0.51764700  |
| C | -3.46835200 | -1.18006500 | 0.47685900  |
| C | -4.49630800 | -1.89496300 | -0.16322700 |
| C | -3.77243900 | 0.05466200  | 1.08133900  |
| C | -5.78365000 | -1.38234200 | -0.20206600 |
| H | -4.26698400 | -2.84835700 | -0.62303800 |
| C | -5.06474800 | 0.55168600  | 1.04218400  |
| H | -2.97967500 | 0.60767800  | 1.57144700  |
| C | -6.07523500 | -0.16089700 | 0.39936500  |
| H | -6.56665600 | -1.93986800 | -0.70225400 |
| H | -5.28633200 | 1.50154400  | 1.51422100  |
| H | -7.08360000 | 0.23308800  | 0.36827400  |
| C | -0.96333800 | -2.00057200 | 0.39739300  |
| H | -0.11150600 | -2.52600700 | 0.79326600  |

SCF Done: E(UM062X) = -925.005876077 A.U.

<S\*\*2> = 0.5005

|                                          |                             |
|------------------------------------------|-----------------------------|
| Zero-point correction=                   | 0.316560 (Hartree/Particle) |
| Thermal correction to Energy=            | 0.388799                    |
| Thermal correction to Enthalpy=          | 0.390614                    |
| Thermal correction to Gibbs Free Energy= | 0.178751                    |

SCF Done: E(UB3LYP) = -925.506826665 A.U.  
<S\*\*2> = 0.6210

**TS7-3**

|   |             |             |             |
|---|-------------|-------------|-------------|
| C | 0.81766700  | 0.15490400  | 1.20290300  |
| C | -0.62683100 | 0.06717300  | 1.43940300  |
| C | -0.43833900 | -0.99478000 | 2.31508100  |
| H | -1.09984200 | -1.62491400 | 2.89252500  |
| C | -1.80425500 | 0.69398400  | 0.86014600  |
| C | -1.77491700 | 1.15533800  | -0.46202200 |
| C | -3.00047300 | 0.77876700  | 1.58287400  |
| C | -2.91444400 | 1.69599700  | -1.04180300 |
| H | -0.86129800 | 1.04964800  | -1.03734600 |
| C | -4.13620900 | 1.32276900  | 1.00038600  |
| H | -3.02567300 | 0.42642500  | 2.60825200  |
| C | -4.09634800 | 1.78591600  | -0.31253100 |
| H | -2.88225600 | 2.04063400  | -2.06886200 |
| H | -5.05506500 | 1.38963500  | 1.57091200  |
| H | -4.98399500 | 2.21173600  | -0.76477200 |
| C | 1.73774400  | 1.02741600  | 0.54587600  |
| C | 3.07201100  | 0.61001600  | 0.36302800  |
| C | 1.36743400  | 2.30631300  | 0.08670500  |
| C | 3.98994700  | 1.43315700  | -0.26660900 |
| H | 3.36473500  | -0.37689900 | 0.70736200  |
| C | 2.29509500  | 3.12423900  | -0.53836300 |
| H | 0.35469800  | 2.65611700  | 0.24800100  |
| C | 3.60763500  | 2.69441500  | -0.72287400 |
| H | 5.00984500  | 1.09370200  | -0.40474000 |
| H | 1.99584800  | 4.10855700  | -0.87886300 |
| H | 4.32784200  | 3.33778800  | -1.21329400 |
| C | 1.01027700  | -1.03773300 | 2.01602600  |
| H | 1.83561000  | -1.26491100 | 2.67834200  |
| C | 2.07483300  | -3.44864100 | 1.11925600  |
| C | 1.28156300  | -2.61019300 | 0.66433500  |
| C | 0.43920900  | -2.24450300 | -0.46971100 |
| C | 0.99558900  | -1.58364300 | -1.56815600 |
| C | -0.93102100 | -2.51343600 | -0.45261700 |
| C | 0.19260700  | -1.21447100 | -2.64018300 |
| H | 2.05636600  | -1.36231400 | -1.57319000 |
| C | -1.73126200 | -2.13581700 | -1.52411300 |
| H | -1.36153100 | -3.01861600 | 0.40355900  |
| C | -1.17208600 | -1.48708800 | -2.61952400 |
| H | 0.63537700  | -0.70987600 | -3.49078000 |



|   |             |             |             |
|---|-------------|-------------|-------------|
| H | -2.79460000 | -2.34177600 | -1.49874900 |
| H | -1.79864500 | -1.19094500 | -3.45261400 |
| H | 2.75003800  | -3.90459100 | 1.80918400  |

SCF Done: E(UM062X) = -924.998504463 A.U.

<S\*\*2> = 1.0454

|                                          |                             |
|------------------------------------------|-----------------------------|
| Zero-point correction=                   | 0.315700 (Hartree/Particle) |
| Thermal correction to Energy=            | 0.388208                    |
| Thermal correction to Enthalpy=          | 0.390023                    |
| Thermal correction to Gibbs Free Energy= | 0.180763                    |

SCF Done: E(UB3LYP) = -925.500943657 A.U.

<S\*\*2> = 1.0436

#### TS7-4

|   |             |             |             |
|---|-------------|-------------|-------------|
| C | -0.60468300 | -0.42171700 | 2.08756600  |
| C | -0.14877600 | 0.45490600  | 1.05203000  |
| C | 0.30512800  | -1.40872700 | 1.73677700  |
| H | -1.39004900 | -0.35706500 | 2.82858400  |
| H | 0.55705400  | -2.38629800 | 2.12067400  |
| C | 2.27165900  | -0.41119100 | 0.33834000  |
| C | 2.86481600  | 0.85174000  | 0.26094800  |
| C | 3.07381600  | -1.54291600 | 0.14314500  |
| C | 4.22328700  | 0.97789400  | -0.01166500 |
| H | 2.26541600  | 1.73688800  | 0.43824700  |
| C | 4.42823400  | -1.41521000 | -0.12569300 |
| H | 2.61808900  | -2.52640900 | 0.19402700  |
| C | 5.00863800  | -0.15120000 | -0.20876500 |
| H | 4.66894100  | 1.96437900  | -0.06336300 |
| H | 5.03433900  | -2.30161200 | -0.27224700 |
| H | 6.06628600  | -0.05011500 | -0.42034700 |
| C | -0.60238000 | 1.69714700  | 0.51443800  |
| C | -1.59513400 | 2.44089200  | 1.18269700  |
| C | -0.12315400 | 2.17807900  | -0.72163400 |
| C | -2.08125600 | 3.61789100  | 0.64133400  |
| H | -1.97696000 | 2.07887800  | 2.13081600  |
| C | -0.61844600 | 3.35690000  | -1.25675100 |
| H | 0.61517000  | 1.59759500  | -1.26380000 |
| C | -1.59595100 | 4.08466200  | -0.58056400 |
| H | -2.84416500 | 4.17761900  | 1.16958500  |
| H | -0.24589700 | 3.70977300  | -2.21137000 |
| H | -1.97969800 | 5.00549500  | -1.00259300 |
| C | 0.84098400  | -0.58233900 | 0.62620700  |
| C | 0.82062900  | -1.38866100 | -2.06173900 |

|   |             |             |             |
|---|-------------|-------------|-------------|
| C | -0.01092000 | -1.34697900 | -1.13923600 |
| C | -1.40023800 | -1.62010500 | -0.78374100 |
| C | -1.74811400 | -2.85090000 | -0.22358900 |
| C | -2.38296400 | -0.64459600 | -0.96238900 |
| C | -3.06255700 | -3.10505100 | 0.14622100  |
| H | -0.98116600 | -3.60449000 | -0.08621200 |
| C | -3.69538500 | -0.90055600 | -0.58329400 |
| H | -2.11085400 | 0.31230600  | -1.39173600 |
| C | -4.03846500 | -2.12851000 | -0.02781300 |
| H | -3.32483500 | -4.06592900 | 0.57283200  |
| H | -4.45042400 | -0.13611100 | -0.72409400 |
| H | -5.06264000 | -2.32561400 | 0.26590000  |
| H | 1.76878900  | -1.27799100 | -2.54188100 |

SCF Done: E(UM062X) = -924.995728152 A.U.

<S\*\*2> = 1.0897

|                                          |                             |
|------------------------------------------|-----------------------------|
| Zero-point correction=                   | 0.315381 (Hartree/Particle) |
| Thermal correction to Energy=            | 0.388056                    |
| Thermal correction to Enthalpy=          | 0.389871                    |
| Thermal correction to Gibbs Free Energy= | 0.179439                    |

SCF Done: E(UB3LYP) = -925.496372969 A.U.

<S\*\*2> = 1.0811

### TS7-5

|   |             |             |             |
|---|-------------|-------------|-------------|
| C | 1.51084600  | -0.64268900 | -0.91176500 |
| C | 0.29261200  | 0.22514500  | -1.08534000 |
| C | -0.35143800 | -0.76121300 | -1.74486700 |
| H | -1.27702900 | -0.84106500 | -2.29637600 |
| C | -0.10309400 | 1.58306100  | -0.71834900 |
| C | 0.83601000  | 2.61391500  | -0.60737800 |
| C | -1.45742200 | 1.87259600  | -0.51030600 |
| C | 0.42963300  | 3.90266500  | -0.28383600 |
| H | 1.88323600  | 2.40300600  | -0.79353000 |
| C | -1.85872300 | 3.16071100  | -0.18558000 |
| H | -2.18840400 | 1.07444700  | -0.58751800 |
| C | -0.91642300 | 4.17886900  | -0.06677900 |
| H | 1.16559500  | 4.69398400  | -0.20339900 |
| H | -2.90903700 | 3.36875800  | -0.01756900 |
| H | -1.23003200 | 5.18301700  | 0.19245200  |
| C | 2.76201900  | -0.55204500 | -0.18721000 |
| C | 3.80984600  | -1.44024900 | -0.47777700 |
| C | 2.93815600  | 0.37416500  | 0.85087900  |
| C | 4.99474700  | -1.39628500 | 0.23906600  |

|   |             |             |             |
|---|-------------|-------------|-------------|
| H | 3.68795300  | -2.15420000 | -1.28517900 |
| C | 4.12957800  | 0.41762700  | 1.56349000  |
| H | 2.12519900  | 1.04102800  | 1.11171900  |
| C | 5.16222000  | -0.46298700 | 1.26075100  |
| H | 5.79580700  | -2.08544800 | -0.00102600 |
| H | 4.24874600  | 1.13749300  | 2.36466600  |
| H | 6.09091200  | -0.42630700 | 1.81718400  |
| C | 0.87170000  | -1.69076100 | -1.53841600 |
| H | 1.23014500  | -2.53991500 | -2.10520000 |
| C | -1.11612900 | -2.29847600 | 0.11831100  |
| C | -2.38678300 | -1.72119000 | 0.38984400  |
| C | -3.52011000 | -2.06181500 | -0.36699800 |
| C | -2.51687700 | -0.78079900 | 1.42546100  |
| C | -4.74194600 | -1.46272600 | -0.10211900 |
| H | -3.42371500 | -2.79335400 | -1.16041400 |
| C | -3.74653400 | -0.19475900 | 1.68636600  |
| H | -1.64055500 | -0.51102100 | 2.00260600  |
| C | -4.86277100 | -0.52694300 | 0.92291000  |
| H | -5.60817600 | -1.73023100 | -0.69590700 |
| H | -3.83216600 | 0.53215500  | 2.48550800  |
| H | -5.82032900 | -0.06337100 | 1.12617100  |
| C | -0.00075600 | -2.79797000 | -0.03345900 |
| H | 0.75168900  | -3.51606400 | 0.22440800  |

SCF Done: E(RM062X) = -925.012098338 A.U.

|                                          |                             |
|------------------------------------------|-----------------------------|
| Zero-point correction=                   | 0.318751 (Hartree/Particle) |
| Thermal correction to Energy=            | 0.390266                    |
| Thermal correction to Enthalpy=          | 0.392081                    |
| Thermal correction to Gibbs Free Energy= | 0.181864                    |

SCF Done: E(RB3LYP) = -925.510365733 A.U.

#### TS7-6

|   |             |             |             |
|---|-------------|-------------|-------------|
| C | -0.81551500 | 2.70453800  | 1.34462800  |
| C | -0.87970400 | 1.66799400  | 0.30294400  |
| C | -2.00060900 | 0.97481100  | -0.32124100 |
| C | -3.24220500 | 1.61377200  | -0.42064400 |
| C | -1.88165200 | -0.34340800 | -0.78154100 |
| C | -4.32864300 | 0.96451900  | -0.99089700 |
| H | -3.34514500 | 2.63048900  | -0.05746300 |
| C | -2.97216800 | -0.99234900 | -1.34352800 |
| H | -0.94005700 | -0.86926500 | -0.66646200 |

|   |             |             |             |
|---|-------------|-------------|-------------|
| C | -4.19676900 | -0.34026000 | -1.45641500 |
| H | -5.28083100 | 1.47560300  | -1.07077600 |
| H | -2.86579700 | -2.01570600 | -1.68427400 |
| H | -5.04596400 | -0.84820600 | -1.89764200 |
| C | 0.54864700  | 2.60289300  | 1.44622900  |
| H | 1.30845600  | 3.31510300  | 1.74220700  |
| C | 1.04063800  | 1.10084700  | 2.80706500  |
| H | 1.31682800  | 1.63303500  | 3.69386500  |
| C | 0.49105700  | 1.57949500  | 0.25770900  |
| C | 0.89346600  | 0.04289100  | 2.19181000  |
| C | 0.62848800  | -1.21768800 | 1.58793000  |
| C | 1.52762800  | -1.81358200 | 0.68767500  |
| C | -0.58416100 | -1.86995400 | 1.87378200  |
| C | 1.19999500  | -3.01285500 | 0.07083700  |
| H | 2.46922700  | -1.32454600 | 0.46935900  |
| C | -0.89142000 | -3.07508900 | 1.26266100  |
| H | -1.27960000 | -1.40665500 | 2.56307900  |
| C | -0.00657600 | -3.64823800 | 0.35153100  |
| H | 1.89653300  | -3.45373900 | -0.63271600 |
| H | -1.83172500 | -3.56390100 | 1.48848000  |
| H | -0.25270700 | -4.58656700 | -0.13062000 |
| H | -1.56676200 | 3.27106600  | 1.87781600  |
| C | 1.53827700  | 1.09481400  | -0.60550900 |
| C | 1.27669600  | 0.41096600  | -1.80380900 |
| C | 2.87684600  | 1.30094100  | -0.23244300 |
| C | 2.31883100  | -0.07767400 | -2.57763400 |
| H | 0.25388300  | 0.27993900  | -2.13295000 |
| C | 3.91491300  | 0.81251900  | -1.01162000 |
| H | 3.09014200  | 1.82403800  | 0.69283100  |
| C | 3.64104300  | 0.11093700  | -2.18333500 |
| H | 2.09844400  | -0.60507100 | -3.49829400 |
| H | 4.94119000  | 0.97509700  | -0.70402400 |
| H | 4.45126700  | -0.27575700 | -2.78951900 |

SCF Done: E(RM062X) = -925.017835823 A.U.

|                                          |                             |
|------------------------------------------|-----------------------------|
| Zero-point correction=                   | 0.319007 (Hartree/Particle) |
| Thermal correction to Energy=            | 0.390093                    |
| Thermal correction to Enthalpy=          | 0.391908                    |
| Thermal correction to Gibbs Free Energy= | 0.188632                    |

SCF Done: E(RB3LYP) = -925.516228133 A.U.

**TS7-7**

|   |             |             |             |
|---|-------------|-------------|-------------|
| C | -0.21509500 | -1.06027500 | -1.54648800 |
| C | 0.96506400  | -0.74985800 | -0.71654600 |
| C | 2.07518900  | -1.55789300 | -0.26082400 |
| C | 2.40745000  | -2.73573200 | -0.94549500 |
| C | 2.80947900  | -1.22023200 | 0.88716100  |
| C | 3.45447200  | -3.53571300 | -0.51268000 |
| H | 1.84253500  | -3.01081500 | -1.82923100 |
| C | 3.85191500  | -2.02595500 | 1.31991400  |
| H | 2.54393400  | -0.32786400 | 1.44374000  |
| C | 4.18244300  | -3.18432600 | 0.62038300  |
| H | 3.70372900  | -4.43793400 | -1.05857000 |
| H | 4.40641000  | -1.75491500 | 2.21068800  |
| H | 4.99832400  | -3.81087600 | 0.95955800  |
| C | -0.76064800 | 0.15374700  | -1.32614600 |
| H | -1.59878300 | 0.71713100  | -1.70985900 |
| C | -1.78279700 | 0.02619400  | 0.86813100  |
| C | 0.48669600  | 0.52799400  | -0.44902600 |
| C | -0.66962600 | 0.30290300  | 1.31284100  |
| H | -0.55372300 | -1.94964100 | -2.06172200 |
| C | 1.10345400  | 1.84144200  | -0.25999800 |
| C | 2.49187300  | 2.00966800  | -0.18767400 |
| C | 0.28556700  | 2.97691900  | -0.19561900 |
| C | 3.04026700  | 3.27620100  | -0.03780600 |
| H | 3.14109900  | 1.14719400  | -0.28036600 |
| C | 0.83761600  | 4.24237300  | -0.05303200 |
| H | -0.79066700 | 2.85083200  | -0.24860300 |
| C | 2.21754200  | 4.39673800  | 0.03293500  |
| H | 4.11686500  | 3.39115800  | 0.00878800  |
| H | 0.19032600  | 5.11034200  | -0.00895100 |
| H | 2.64982200  | 5.38372000  | 0.14604900  |
| C | -3.13741900 | -0.29589800 | 0.55196500  |
| C | -3.52429600 | -1.63457400 | 0.39090000  |
| C | -4.09537900 | 0.71526000  | 0.39063700  |
| C | -4.83846500 | -1.94869200 | 0.08204100  |
| H | -2.77964100 | -2.41248700 | 0.50994300  |
| C | -5.40643400 | 0.39039700  | 0.07153300  |
| H | -3.79935900 | 1.74925900  | 0.52248700  |
| C | -5.78443700 | -0.93957700 | -0.08263000 |
| H | -5.12733000 | -2.98647700 | -0.03451100 |
| H | -6.13858400 | 1.17953200  | -0.05276500 |
| H | -6.80949700 | -1.18907000 | -0.32846800 |
| H | 0.03797900  | 0.52423700  | 2.08491500  |

SCF Done: E(RM062X) = -925.011009402 A.U.

|                                          |                             |
|------------------------------------------|-----------------------------|
| Zero-point correction=                   | 0.318480 (Hartree/Particle) |
| Thermal correction to Energy=            | 0.390168                    |
| Thermal correction to Enthalpy=          | 0.391983                    |
| Thermal correction to Gibbs Free Energy= | 0.181470                    |

SCF Done: E(RB3LYP) = -925.507939038 A.U.

### TS7-8

|   |             |             |             |
|---|-------------|-------------|-------------|
| C | 1.56072300  | -1.97986800 | 1.59681700  |
| C | 0.25743000  | -1.53840900 | 2.04935200  |
| C | 1.64966900  | -0.99201500 | 0.63469000  |
| C | 0.73902500  | -1.82828600 | -1.05921900 |
| H | 1.57320800  | -2.25325200 | -1.57832800 |
| C | 0.23149000  | -0.48312200 | 1.18202700  |
| C | -0.45042500 | -1.52787900 | -0.94831500 |
| C | -1.83227100 | -1.19024900 | -0.98741800 |
| C | -2.24973800 | -0.02573700 | -1.64830400 |
| C | -2.78269400 | -1.97215400 | -0.31471300 |
| C | -3.58553000 | 0.34804700  | -1.62769500 |
| H | -1.51330000 | 0.58558000  | -2.15530600 |
| C | -4.11794700 | -1.59768600 | -0.31270900 |
| H | -2.45542100 | -2.86410000 | 0.20682200  |
| C | -4.52422600 | -0.43513300 | -0.96383900 |
| H | -3.89289600 | 1.25826700  | -2.12875500 |
| H | -4.84585700 | -2.21206400 | 0.20402100  |
| H | -5.56715900 | -0.14172500 | -0.95167600 |
| H | 2.20453700  | -2.80865900 | 1.85990200  |
| H | -0.44203000 | -1.90649400 | 2.78823400  |
| C | 2.82826300  | -0.32497900 | 0.05485100  |
| C | 4.07765600  | -0.47873400 | 0.66756900  |
| C | 2.74987600  | 0.44688200  | -1.11257700 |
| C | 5.21190500  | 0.11889600  | 0.13229500  |
| H | 4.14580400  | -1.05348600 | 1.58376200  |
| C | 3.88112600  | 1.05706600  | -1.63666800 |
| H | 1.79465500  | 0.54721500  | -1.61575200 |
| C | 5.11731600  | 0.89362900  | -1.01800200 |
| H | 6.16947000  | -0.01003800 | 0.62302600  |
| H | 3.80126500  | 1.65288400  | -2.53831100 |
| H | 6.00004700  | 1.36646500  | -1.43122300 |
| C | -0.57932000 | 0.70526400  | 1.05342800  |
| C | -0.12648900 | 1.84886700  | 0.38522700  |

|   |             |             |             |
|---|-------------|-------------|-------------|
| C | -1.88237700 | 0.70537000  | 1.58110200  |
| C | -0.95724100 | 2.95570400  | 0.24223000  |
| H | 0.88532900  | 1.87680000  | 0.00103000  |
| C | -2.70454500 | 1.80799300  | 1.43249100  |
| H | -2.25050900 | -0.18189700 | 2.08405600  |
| C | -2.24730300 | 2.94005100  | 0.75807900  |
| H | -0.58926700 | 3.83710900  | -0.27011300 |
| H | -3.71125000 | 1.78409000  | 1.83296600  |
| H | -2.89285800 | 3.80219600  | 0.64146000  |

SCF Done: E(RM062X) = -925.013651988 A.U.

|                                          |                             |
|------------------------------------------|-----------------------------|
| Zero-point correction=                   | 0.318486 (Hartree/Particle) |
| Thermal correction to Energy=            | 0.389813                    |
| Thermal correction to Enthalpy=          | 0.391628                    |
| Thermal correction to Gibbs Free Energy= | 0.186834                    |

SCF Done: E(RB3LYP) = -925.511199314 A.U.

## TS8-2

|   |             |             |             |
|---|-------------|-------------|-------------|
| C | 0.33208000  | -0.41700300 | 1.09554600  |
| C | 0.42435000  | -1.33845100 | 2.16955400  |
| H | -0.08827800 | -1.41655000 | 3.12037600  |
| C | -0.32283800 | 0.83462300  | 0.85631300  |
| C | 0.08006100  | 1.68239200  | -0.19073200 |
| C | -1.44554600 | 1.20037000  | 1.62178600  |
| C | -0.60702500 | 2.86032400  | -0.44503200 |
| H | 0.94287000  | 1.41297300  | -0.79001700 |
| C | -2.13212500 | 2.37314700  | 1.35272400  |
| H | -1.78647100 | 0.53967600  | 2.41137100  |
| C | -1.71601700 | 3.21192100  | 0.32065600  |
| H | -0.27622100 | 3.50919800  | -1.24779700 |
| H | -3.00204100 | 2.63320200  | 1.94455600  |
| H | -2.25310700 | 4.12945900  | 0.11342700  |
| C | 2.67381200  | -0.57817500 | -0.09591300 |
| C | 3.03174600  | -0.38986500 | -1.43041900 |
| C | 3.52014200  | -0.08310100 | 0.90064000  |
| C | 4.21135600  | 0.27113400  | -1.76342800 |
| H | 2.38047400  | -0.74891700 | -2.21906000 |
| C | 4.69409000  | 0.57831600  | 0.56963400  |
| H | 3.24514600  | -0.21600600 | 1.94134800  |
| C | 5.04618000  | 0.75603900  | -0.76574500 |
| H | 4.47363700  | 0.40741500  | -2.80599700 |

|   |             |             |             |
|---|-------------|-------------|-------------|
| H | 5.33760700  | 0.95714400  | 1.35487200  |
| H | 5.96346700  | 1.27137000  | -1.02382700 |
| C | 1.37985400  | -2.10321500 | 1.55187700  |
| H | 1.90941300  | -3.01394200 | 1.79548700  |
| C | 1.37812100  | -1.24902000 | 0.29614300  |
| C | -0.69091800 | -1.58463700 | -0.80873400 |
| C | -2.02820100 | -1.23272700 | -0.81309800 |
| C | -2.97031700 | -1.92941700 | -0.01096600 |
| C | -2.46704100 | -0.08798000 | -1.52722700 |
| C | -4.27792200 | -1.49360200 | 0.06451800  |
| H | -2.64139900 | -2.79943200 | 0.54489200  |
| C | -3.77770900 | 0.34020400  | -1.42149800 |
| H | -1.75506500 | 0.45269100  | -2.13733500 |
| C | -4.69239100 | -0.35505900 | -0.63223800 |
| H | -4.98634600 | -2.03837600 | 0.67770300  |
| H | -4.09026000 | 1.22721400  | -1.96006900 |
| H | -5.71796200 | -0.01545400 | -0.55863100 |
| C | 0.57360200  | -1.88732600 | -0.83047200 |
| H | 1.04046600  | -2.56501300 | -1.54464900 |

SCF Done: E(UM062X) = -925.045033634 A.U.

<S\*\*2> = 0.6926

|                                          |                             |
|------------------------------------------|-----------------------------|
| Zero-point correction=                   | 0.319411 (Hartree/Particle) |
| Thermal correction to Energy=            | 0.389647                    |
| Thermal correction to Enthalpy=          | 0.391462                    |
| Thermal correction to Gibbs Free Energy= | 0.188746                    |

SCF Done: E(UB3LYP) = -925.544885931 A.U.

<S\*\*2> = 0.5643

### M-Ph

|   |             |             |             |
|---|-------------|-------------|-------------|
| C | 4.82732400  | 0.00000000  | 0.00000000  |
| C | 4.13050000  | -0.90055800 | -0.79939600 |
| C | 2.74275100  | -0.90357900 | -0.80184200 |
| C | 2.03600700  | 0.00000000  | 0.00000000  |
| C | 2.74275100  | 0.90357900  | 0.80184200  |
| C | 4.13050000  | 0.90055800  | 0.79939500  |
| H | 5.91057200  | 0.00000000  | -0.00000100 |
| H | 4.67020400  | -1.60327600 | -1.42270800 |
| H | 2.19179100  | -1.60093200 | -1.42068000 |
| H | 2.19179100  | 1.60093100  | 1.42068000  |
| H | 4.67020400  | 1.60327600  | 1.42270800  |
| C | 0.60289300  | 0.00000000  | 0.00000000  |
| C | -0.60289300 | 0.00000000  | 0.00000100  |



|   |             |             |             |
|---|-------------|-------------|-------------|
| C | -2.03600700 | 0.00000000  | 0.00000000  |
| C | -2.74275100 | -0.90357900 | 0.80184200  |
| C | -2.74275100 | 0.90358000  | -0.80184100 |
| C | -4.13050000 | -0.90055800 | 0.79939500  |
| H | -2.19179100 | -1.60093100 | 1.42068100  |
| C | -4.13050000 | 0.90055800  | -0.79939500 |
| H | -2.19179100 | 1.60093200  | -1.42068000 |
| C | -4.82732400 | 0.00000000  | -0.00000100 |
| H | -4.67020400 | -1.60327600 | 1.42270800  |
| H | -4.67020400 | 1.60327600  | -1.42270900 |
| H | -5.91057200 | 0.00000000  | -0.00000100 |

SCF Done: E(RM062X) = -539.353935316 A.U.

|                                          |                             |
|------------------------------------------|-----------------------------|
| Zero-point correction=                   | 0.182309 (Hartree/Particle) |
| Thermal correction to Energy=            | 0.222029                    |
| Thermal correction to Enthalpy=          | 0.223844                    |
| Thermal correction to Gibbs Free Energy= | 0.085591                    |

SCF Done: E(RB3LYP) = -539.639165338 A.U.

#### TS1-Ph

|   |             |             |             |
|---|-------------|-------------|-------------|
| C | 3.90508600  | -3.21772600 | 1.42575200  |
| C | 4.24919600  | -1.86725600 | 1.40423500  |
| C | 2.56176900  | -3.58934600 | 1.41935300  |
| H | 4.67878900  | -3.97533700 | 1.44788800  |
| C | 3.26692700  | -0.89191100 | 1.38562400  |
| H | 5.29268400  | -1.57492600 | 1.40607800  |
| C | 1.56775700  | -2.62636900 | 1.38691800  |
| H | 2.29050200  | -4.63851000 | 1.43477100  |
| C | 1.90513500  | -1.25636800 | 1.36943600  |
| H | 3.52901500  | 0.15925300  | 1.37290300  |
| H | 0.52108600  | -2.90700800 | 1.37400100  |
| C | 0.89501700  | -0.28001300 | 1.34034400  |
| C | -0.00543400 | 0.47897500  | 0.89091100  |
| C | 0.00568000  | 0.47911000  | -0.89075200 |
| C | -0.89456900 | -0.28007200 | -1.34025100 |
| C | -1.90487000 | -1.25623000 | -1.36956800 |
| C | -3.26659500 | -0.89150000 | -1.38537900 |
| C | -1.56776300 | -2.62628900 | -1.38768200 |
| C | -4.24905100 | -1.86665300 | -1.40425400 |
| H | -3.52848200 | 0.15970800  | -1.37216900 |
| C | -2.56196200 | -3.58906300 | -1.42036000 |

|   |             |             |             |
|---|-------------|-------------|-------------|
| H | -0.52114500 | -2.90714000 | -1.37504800 |
| C | -3.90520700 | -3.21718100 | -1.42639800 |
| H | -5.29248300 | -1.57411700 | -1.40581600 |
| H | -2.29090100 | -4.63827300 | -1.43626100 |
| H | -4.67906300 | -3.97462900 | -1.44875400 |
| C | -1.03191000 | 1.37220000  | 1.45140800  |
| C | -1.31359800 | 1.28724100  | 2.82107000  |
| C | -1.71516900 | 2.31465800  | 0.67961500  |
| C | -2.25749000 | 2.12047100  | 3.40025800  |
| H | -0.78140000 | 0.55561200  | 3.41733000  |
| C | -2.65741000 | 3.15261100  | 1.26663800  |
| H | -1.50730600 | 2.39562200  | -0.37992000 |
| C | -2.93424000 | 3.05824100  | 2.62445600  |
| H | -2.46764200 | 2.03768600  | 4.45999900  |
| H | -3.17591400 | 3.88249600  | 0.65647500  |
| H | -3.67198900 | 3.71011500  | 3.07672200  |
| C | 1.03194900  | 1.37263700  | -1.45114500 |
| C | 1.31346800  | 1.28808000  | -2.82087000 |
| C | 1.71517800  | 2.31498600  | -0.67919600 |
| C | 2.25716800  | 2.12159500  | -3.39996200 |
| H | 0.78130000  | 0.55653000  | -3.41725100 |
| C | 2.65722800  | 3.15322400  | -1.26612400 |
| H | 1.50744100  | 2.39564500  | 0.38038500  |
| C | 2.93389400  | 3.05925100  | -2.62400100 |
| H | 2.46719200  | 2.03911700  | -4.45975300 |
| H | 3.17572100  | 3.88300800  | -0.65583100 |
| H | 3.67150100  | 3.71133900  | -3.07618900 |

SCF Done: E(UM062X) = -1078.65736781 A.U.

<S\*\*2> = 0.3059

Zero-point correction= 0.362618 (Hartree/Particle)

Thermal correction to Energy= 0.445245

Thermal correction to Enthalpy= 0.447060

Thermal correction to Gibbs Free Energy= 0.207925

SCF Done: E(UB3LYP) = -1079.24278685 A.U.

<S\*\*2> = 0.1948

#### INT1-Ph

|   |             |             |            |
|---|-------------|-------------|------------|
| C | -3.84030300 | -3.11591400 | 1.13371700 |
| C | -2.58412400 | -3.70616400 | 1.00270700 |
| C | -3.94217600 | -1.73942000 | 1.33583000 |
| H | -4.73463100 | -3.72481700 | 1.08158500 |
| C | -1.43666900 | -2.93546000 | 1.07515900 |

|   |             |             |             |
|---|-------------|-------------|-------------|
| H | -2.50228700 | -4.77457400 | 0.84199900  |
| C | -2.80489800 | -0.95433100 | 1.40544700  |
| H | -4.91743200 | -1.27762400 | 1.43777800  |
| C | -1.52620400 | -1.53926800 | 1.26670000  |
| H | -0.45768100 | -3.38787900 | 0.97003400  |
| H | -2.87737300 | 0.11698300  | 1.55107600  |
| C | -0.36497700 | -0.75068100 | 1.34594000  |
| C | 0.56753700  | -0.04267100 | 0.76533900  |
| C | 0.56742100  | 0.04277300  | -0.76527200 |
| C | -0.36516000 | 0.75081000  | -1.34572400 |
| C | -1.52643200 | 1.53930500  | -1.26649400 |
| C | -1.43700600 | 2.93553800  | -1.07515800 |
| C | -2.80509200 | 0.95423500  | -1.40504400 |
| C | -2.58452200 | 3.70614700  | -1.00271000 |
| H | -0.45804800 | 3.38805600  | -0.97018300 |
| C | -3.94243000 | 1.73923600  | -1.33543600 |
| H | -2.87748500 | -0.11710400 | -1.55052500 |
| C | -3.84066100 | 3.11576700  | -1.13352300 |
| H | -2.50276700 | 4.77458700  | -0.84215900 |
| H | -4.91765500 | 1.27734000  | -1.43723500 |
| H | -4.73503900 | 3.72459800  | -1.08139200 |
| C | 1.65524400  | 0.67559700  | 1.48251700  |
| C | 1.89400500  | 0.42915500  | 2.83926600  |
| C | 2.44523500  | 1.61783100  | 0.82138600  |
| C | 2.88890400  | 1.11663300  | 3.51729000  |
| H | 1.28860300  | -0.30826900 | 3.35477700  |
| C | 3.44349500  | 2.30561400  | 1.50344000  |
| H | 2.27816600  | 1.81564500  | -0.23101300 |
| C | 3.66852700  | 2.05949200  | 2.85154900  |
| H | 3.06093900  | 0.91469500  | 4.56799900  |
| H | 4.04681100  | 3.03460600  | 0.97573900  |
| H | 4.44799000  | 2.59403700  | 3.38130900  |
| C | 1.65499900  | -0.67552900 | -1.48261400 |
| C | 1.89354100  | -0.42914100 | -2.83941100 |
| C | 2.44508100  | -1.61775000 | -0.82157500 |
| C | 2.88832000  | -1.11666100 | -3.51757000 |
| H | 1.28806600  | 0.30827300  | -3.35485000 |
| C | 3.44321800  | -2.30557500 | -1.50376500 |
| H | 2.27818200  | -1.81551600 | 0.23086000  |
| C | 3.66803500  | -2.05950700 | -2.85192000 |
| H | 3.06018900  | -0.91476500 | -4.56831400 |
| H | 4.04660800  | -3.03455600 | -0.97613400 |
| H | 4.44740400  | -2.59408300 | -3.38178500 |

SCF Done: E(UM062X) = -1078.66559846 A.U.  
 <S\*\*2> = 0.9994  
 Zero-point correction= 0.364878 (Hartree/Particle)  
 Thermal correction to Energy= 0.447647  
 Thermal correction to Enthalpy= 0.449462  
 Thermal correction to Gibbs Free Energy= 0.211528

SCF Done: E(UB3LYP) = -1079.24833505 A.U.  
 <S\*\*2> = 0.9446

**TS2-Ph**

|   |             |             |             |
|---|-------------|-------------|-------------|
| C | 3.57287900  | -2.70275500 | 0.52192400  |
| C | 2.79014400  | -3.04758600 | 1.64758700  |
| C | 1.42000200  | -2.99026900 | 1.58966200  |
| C | 0.77771900  | -2.55138000 | 0.40327400  |
| C | 1.57385600  | -2.17985700 | -0.71630600 |
| C | 2.97341600  | -2.30097000 | -0.64988700 |
| C | -0.57710200 | -2.25170800 | 0.30688900  |
| C | -1.18181500 | -1.13744800 | -0.03961700 |
| H | 4.65254000  | -2.77528100 | 0.58101200  |
| H | 0.81103500  | -3.25281800 | 2.44619200  |
| H | 1.08813000  | -1.99282900 | -1.66573400 |
| H | 3.57537000  | -2.05090000 | -1.51571700 |
| C | 4.63336100  | 2.10729900  | -0.88628300 |
| C | 3.69228300  | 2.12460400  | -1.91392300 |
| C | 2.46716100  | 1.49731000  | -1.75303100 |
| C | 2.16062600  | 0.83460400  | -0.54842900 |
| C | 3.12950800  | 0.80303500  | 0.47501600  |
| C | 4.34397300  | 1.44781000  | 0.30645000  |
| C | 0.94234800  | 0.13635200  | -0.37474400 |
| C | -0.31064000 | 0.14051100  | -0.00938600 |
| H | 5.58824900  | 2.60189700  | -1.01619800 |
| H | 3.91511300  | 2.63476300  | -2.84356100 |
| H | 1.73240500  | 1.50844400  | -2.55008500 |
| H | 2.90183600  | 0.26921100  | 1.39040100  |
| H | 5.07435700  | 1.43023000  | 1.10671600  |
| H | 3.27990400  | -3.36208600 | 2.56152500  |
| C | -0.94671200 | 1.35997800  | 0.58185400  |
| C | -1.85931300 | 1.23030500  | 1.63096700  |
| C | -0.62072400 | 2.63696900  | 0.12071400  |
| C | -2.42786100 | 2.35696800  | 2.21102900  |
| H | -2.12263900 | 0.24194900  | 1.99007800  |
| C | -1.19477000 | 3.76183400  | 0.69926900  |
| H | 0.08419700  | 2.74553300  | -0.69553800 |

|   |             |             |             |
|---|-------------|-------------|-------------|
| C | -2.09968300 | 3.62600400  | 1.74662800  |
| H | -3.13361600 | 2.24178500  | 3.02502600  |
| H | -0.93533200 | 4.74664100  | 0.32919400  |
| H | -2.54898400 | 4.50364900  | 2.19559300  |
| C | -2.59525400 | -1.02207200 | -0.46871700 |
| C | -3.01267700 | -0.00578200 | -1.33124800 |
| C | -3.53211900 | -1.96601600 | -0.03593900 |
| C | -4.33420800 | 0.06000600  | -1.75542700 |
| H | -2.29846000 | 0.73374000  | -1.67500300 |
| C | -4.85176400 | -1.89691900 | -0.45857500 |
| H | -3.20793500 | -2.74925400 | 0.63976100  |
| C | -5.25885200 | -0.88233800 | -1.31990500 |
| H | -4.64224400 | 0.85308800  | -2.42632000 |
| H | -5.56621900 | -2.63362700 | -0.11016700 |
| H | -6.29039300 | -0.82505900 | -1.64625700 |

SCF Done: E(UM062X) = -1078.65593396 A.U.

<S\*\*2> = 0.5882

|                                          |                             |
|------------------------------------------|-----------------------------|
| Zero-point correction=                   | 0.364262 (Hartree/Particle) |
| Thermal correction to Energy=            | 0.445293                    |
| Thermal correction to Enthalpy=          | 0.447108                    |
| Thermal correction to Gibbs Free Energy= | 0.218370                    |

SCF Done: E(UB3LYP) = -1079.24138820 A.U.

<S\*\*2> = 0.4562

### INT2-Ph

|   |             |             |             |
|---|-------------|-------------|-------------|
| C | -3.29974100 | -3.11104000 | -0.25084100 |
| C | -2.51453300 | -3.73966100 | -1.30511800 |
| C | -1.18036000 | -3.56901300 | -1.37076100 |
| C | -0.50353100 | -2.71254500 | -0.42737300 |
| C | -1.29378400 | -1.90275100 | 0.58543300  |
| C | -2.74919600 | -2.27307500 | 0.63396900  |
| C | 0.76126200  | -2.29141300 | -0.50233300 |
| C | 1.27012300  | -1.10103100 | -0.21014800 |
| H | -4.35216900 | -3.35889600 | -0.17495300 |
| H | -0.58170600 | -4.04869100 | -2.13596900 |
| H | -0.88578600 | -2.03449500 | 1.59873100  |
| H | -3.34746200 | -1.86117500 | 1.43853100  |
| C | -4.25448800 | 2.33598700  | 0.81518800  |
| C | -3.71743900 | 1.65894600  | 1.90528500  |
| C | -2.66538700 | 0.76927100  | 1.72304300  |
| C | -2.13075200 | 0.55366400  | 0.45035400  |
| C | -2.68204200 | 1.22914100  | -0.63933300 |

|   |             |             |             |
|---|-------------|-------------|-------------|
| C | -3.73617500 | 2.11552200  | -0.45645600 |
| C | -1.00449300 | -0.38960200 | 0.25152400  |
| C | 0.21293400  | -0.01529400 | -0.18750500 |
| H | -5.07337500 | 3.03094600  | 0.95642800  |
| H | -4.11598200 | 1.82546800  | 2.89919500  |
| H | -2.23836000 | 0.25128100  | 2.57625700  |
| H | -2.26773100 | 1.06214000  | -1.62706800 |
| H | -4.15294900 | 2.63632100  | -1.31030700 |
| H | -3.02196200 | -4.36643900 | -2.02864500 |
| C | 2.63755500  | -0.87124700 | 0.28922600  |
| C | 2.94690300  | 0.19489900  | 1.14147000  |
| C | 3.65308200  | -1.76889400 | -0.06085500 |
| C | 4.23413700  | 0.34584000  | 1.63999900  |
| H | 2.17645000  | 0.90009600  | 1.42720200  |
| C | 4.93828600  | -1.61463900 | 0.43876600  |
| H | 3.41612700  | -2.58063300 | -0.73901800 |
| C | 5.23434600  | -0.55495600 | 1.29071900  |
| H | 4.45664900  | 1.17271100  | 2.30394200  |
| H | 5.71321100  | -2.31730000 | 0.15595400  |
| H | 6.23937400  | -0.42898400 | 1.67538100  |
| C | 0.60501600  | 1.36127400  | -0.58848300 |
| C | 0.21468400  | 2.50366400  | 0.11870600  |
| C | 1.44094800  | 1.51494800  | -1.69778600 |
| C | 0.63279600  | 3.76324200  | -0.29015600 |
| H | -0.40989100 | 2.40622100  | 0.99845400  |
| C | 1.85054400  | 2.77613600  | -2.11176300 |
| H | 1.77158000  | 0.63191300  | -2.23457700 |
| C | 1.44643300  | 3.90576000  | -1.40953000 |
| H | 0.32548400  | 4.63698600  | 0.27250600  |
| H | 2.49407100  | 2.87404200  | -2.97792400 |
| H | 1.77166900  | 4.88969200  | -1.72557300 |

SCF Done: E(RM062X) = -1078.70071813 A.U.

|                                          |                             |
|------------------------------------------|-----------------------------|
| Zero-point correction=                   | 0.367785 (Hartree/Particle) |
| Thermal correction to Energy=            | 0.448477                    |
| Thermal correction to Enthalpy=          | 0.450292                    |
| Thermal correction to Gibbs Free Energy= | 0.224686                    |

SCF Done: E(RB3LYP) = -1079.27557089 A.U.

### TS3-Ph

|   |            |             |            |
|---|------------|-------------|------------|
| C | 3.59941000 | -3.22466600 | 0.09202500 |
|---|------------|-------------|------------|

|   |             |             |             |
|---|-------------|-------------|-------------|
| C | 2.68583300  | -4.32861300 | 0.06440800  |
| C | 1.34923500  | -4.11542000 | 0.03012100  |
| C | 0.76641400  | -2.78572700 | 0.00412400  |
| C | 1.74554500  | -1.64204800 | -0.04614100 |
| C | 3.16080100  | -1.94410000 | 0.05516600  |
| C | -0.64655900 | -2.60980300 | 0.03169000  |
| C | -1.06126500 | -1.28133600 | -0.06866300 |
| H | 4.66218100  | -3.42096800 | 0.16854200  |
| H | 0.62790200  | -4.92253800 | 0.06183400  |
| H | 1.27829400  | -2.22947800 | -1.07244900 |
| H | 3.85538100  | -1.11735200 | 0.12922000  |
| C | 3.88867500  | 3.01967700  | 0.15487900  |
| C | 3.90602700  | 2.17680400  | -0.95113600 |
| C | 3.04054700  | 1.09056800  | -1.01128200 |
| C | 2.14595600  | 0.83545200  | 0.03018900  |
| C | 2.14129400  | 1.68281000  | 1.13913400  |
| C | 3.00592000  | 2.76828300  | 1.19984800  |
| C | 1.20363000  | -0.31765500 | -0.04523200 |
| C | -0.17476000 | -0.14900500 | -0.06824000 |
| H | 4.55910600  | 3.86937900  | 0.20109000  |
| H | 4.58852100  | 2.36830800  | -1.77063600 |
| H | 3.04592400  | 0.43996400  | -1.88048800 |
| H | 1.44304100  | 1.49415700  | 1.94653500  |
| H | 2.98736100  | 3.42101400  | 2.06434700  |
| H | 3.07560300  | -5.33858200 | 0.09910500  |
| C | -2.54032200 | -1.05390200 | -0.13059900 |
| C | -3.12798900 | -0.20032100 | -1.06711600 |
| C | -3.36900400 | -1.75855700 | 0.74506500  |
| C | -4.50747200 | -0.03780300 | -1.11184100 |
| H | -2.50404900 | 0.33839200  | -1.77105000 |
| C | -4.74583200 | -1.57972600 | 0.71657600  |
| H | -2.90936600 | -2.45917500 | 1.43191900  |
| C | -5.32086800 | -0.71662400 | -0.21154300 |
| H | -4.94587000 | 0.62335200  | -1.85028900 |
| H | -5.37338800 | -2.12382500 | 1.41300400  |
| H | -6.39579500 | -0.58177000 | -0.23906400 |
| C | -0.71459100 | 1.24316800  | -0.00199900 |
| C | -0.42034100 | 2.18365400  | -0.98853700 |
| C | -1.51806600 | 1.61755700  | 1.07600500  |
| C | -0.92658700 | 3.47497600  | -0.90337500 |
| H | 0.20724400  | 1.89930800  | -1.82622000 |
| C | -2.01164400 | 2.91215100  | 1.16893500  |
| H | -1.76248200 | 0.88286900  | 1.83561700  |
| C | -1.72045600 | 3.84343100  | 0.17752900  |

|   |             |            |             |
|---|-------------|------------|-------------|
| H | -0.69724200 | 4.19506100 | -1.67989700 |
| H | -2.63164300 | 3.19119300 | 2.01256100  |
| H | -2.11191300 | 4.85135500 | 0.24636900  |

SCF Done: E(RM062X) = -1078.66257231 A.U.

|                                          |                             |
|------------------------------------------|-----------------------------|
| Zero-point correction=                   | 0.363755 (Hartree/Particle) |
| Thermal correction to Energy=            | 0.443649                    |
| Thermal correction to Enthalpy=          | 0.445464                    |
| Thermal correction to Gibbs Free Energy= | 0.222340                    |

SCF Done: E(RB3LYP) = -1079.23357501 A.U.

**P1-Ph**

|   |             |             |             |
|---|-------------|-------------|-------------|
| C | 3.58027100  | -3.25884500 | 0.09402800  |
| C | 2.67243300  | -4.33974300 | 0.02681400  |
| C | 1.32749400  | -4.09732700 | -0.03267200 |
| C | 0.82933700  | -2.76932800 | -0.03587600 |
| C | 1.73835200  | -1.67941600 | 0.00085800  |
| C | 3.12860200  | -1.96565000 | 0.08278800  |
| C | -0.55967000 | -2.50737700 | -0.06897900 |
| C | -1.05478200 | -1.22825300 | -0.06175900 |
| H | 4.64347900  | -3.45644700 | 0.16044500  |
| H | 0.61800500  | -4.91680400 | -0.07261600 |
| H | -1.24820800 | -3.34474700 | -0.12341700 |
| H | 3.83397100  | -1.14730500 | 0.14828500  |
| C | 3.90406800  | 2.99982700  | 0.12379900  |
| C | 3.89508900  | 2.15585100  | -0.98163900 |
| C | 3.03592600  | 1.06324900  | -1.01728200 |
| C | 2.17148300  | 0.80533700  | 0.04824100  |
| C | 2.19425400  | 1.65236400  | 1.15657000  |
| C | 3.05437200  | 2.74267800  | 1.19431200  |
| C | 1.22078400  | -0.34436600 | -0.00637400 |
| C | -0.14556200 | -0.12046900 | -0.02719500 |
| H | 4.57023500  | 3.85386100  | 0.15047600  |
| H | 4.55483200  | 2.35024700  | -1.81907600 |
| H | 3.02265700  | 0.40665200  | -1.88131500 |
| H | 1.52117600  | 1.45836300  | 1.98407600  |
| H | 3.05719300  | 3.39485200  | 2.05958900  |
| H | 3.04497800  | -5.35703100 | 0.03154200  |
| C | -2.53081000 | -1.03279000 | -0.11543900 |
| C | -3.12199100 | -0.23124700 | -1.09583800 |
| C | -3.35255200 | -1.67937300 | 0.80928600  |



|   |             |             |             |
|---|-------------|-------------|-------------|
| C | -4.50059600 | -0.07963700 | -1.14576200 |
| H | -2.49468500 | 0.27455800  | -1.82053400 |
| C | -4.73392200 | -1.52245300 | 0.76335800  |
| H | -2.89927600 | -2.29382400 | 1.57973900  |
| C | -5.31134900 | -0.72132600 | -0.21395100 |
| H | -4.94395200 | 0.54297600  | -1.91369300 |
| H | -5.35702700 | -2.02363800 | 1.49462700  |
| H | -6.38689600 | -0.59573600 | -0.25006300 |
| C | -0.68629700 | 1.27093800  | 0.02047900  |
| C | -0.38298600 | 2.19734100  | -0.97779200 |
| C | -1.51205900 | 1.66159000  | 1.07577200  |
| C | -0.89650400 | 3.48737600  | -0.92309800 |
| H | 0.26067400  | 1.90164700  | -1.79874400 |
| C | -2.01878700 | 2.95362700  | 1.13614200  |
| H | -1.75959300 | 0.94274500  | 1.84958000  |
| C | -1.71397800 | 3.86973400  | 0.13524200  |
| H | -0.65505500 | 4.19553400  | -1.70690400 |
| H | -2.65479700 | 3.24351300  | 1.96409000  |
| H | -2.11142400 | 4.87671600  | 0.17970400  |

SCF Done: E(RM062X) = -1078.85194419 A.U.

|                                          |                             |
|------------------------------------------|-----------------------------|
| Zero-point correction=                   | 0.370436 (Hartree/Particle) |
| Thermal correction to Energy=            | 0.449984                    |
| Thermal correction to Enthalpy=          | 0.451799                    |
| Thermal correction to Gibbs Free Energy= | 0.230343                    |

SCF Done: E(RB3LYP) = -1079.42480109 A.U.

#### TS4-Ph

|   |             |             |             |
|---|-------------|-------------|-------------|
| C | -1.34589000 | 4.07483900  | -1.82629400 |
| C | -0.88869800 | 3.06790100  | -2.67441200 |
| C | -1.53457500 | 3.80260100  | -0.47399500 |
| H | -1.56102900 | 5.06123900  | -2.21931400 |
| C | -0.61330600 | 1.80338500  | -2.17512200 |
| H | -0.74663700 | 3.26987300  | -3.72952400 |
| C | -1.26523700 | 2.53799400  | 0.03158300  |
| H | -1.89337700 | 4.57955800  | 0.19117000  |
| C | -0.78009200 | 1.52270000  | -0.80766900 |
| H | -0.24793300 | 1.02094100  | -2.83126300 |
| H | -1.42023800 | 2.32989800  | 1.08354200  |
| C | 0.60299700  | -0.58694500 | -0.43385900 |
| C | 1.88212700  | -0.10189600 | -1.10583900 |

|   |             |             |             |
|---|-------------|-------------|-------------|
| C | 2.51424300  | 0.92886200  | -0.60154200 |
| C | 2.59456500  | 1.97800100  | 0.32852500  |
| C | 3.30293700  | 1.81927700  | 1.54165500  |
| C | 1.98815800  | 3.22694700  | 0.05763300  |
| C | 3.37180400  | 2.85853700  | 2.45345100  |
| H | 3.77650100  | 0.86703200  | 1.75014100  |
| C | 2.06638900  | 4.25481400  | 0.98068400  |
| H | 1.44640900  | 3.35900100  | -0.87233900 |
| C | 2.75307300  | 4.07881900  | 2.18201100  |
| H | 3.91159400  | 2.72130400  | 3.38351500  |
| H | 1.58300200  | 5.20048300  | 0.76510500  |
| H | 2.80994900  | 4.88777000  | 2.89991600  |
| C | 0.63713000  | -1.96917200 | 0.11205200  |
| C | -0.46109200 | -2.82023600 | -0.03597900 |
| C | 1.75429400  | -2.41746600 | 0.81819500  |
| C | -0.44906200 | -4.08797200 | 0.53099400  |
| H | -1.32363100 | -2.47053900 | -0.59309800 |
| C | 1.76019100  | -3.68133500 | 1.39552700  |
| H | 2.60936200  | -1.75951400 | 0.92987800  |
| C | 0.65878600  | -4.51904100 | 1.25524400  |
| H | -1.30401900 | -4.74259500 | 0.40592200  |
| H | 2.62554400  | -4.01172200 | 1.95781100  |
| H | 0.66671200  | -5.50694900 | 1.70041900  |
| C | 2.35309100  | -0.85271400 | -2.30109700 |
| C | 3.68409800  | -0.76372300 | -2.72178700 |
| C | 1.46573200  | -1.63965700 | -3.03847700 |
| C | 4.11239000  | -1.43674500 | -3.85599100 |
| H | 4.37805900  | -0.16277300 | -2.14473200 |
| C | 1.89678600  | -2.31349200 | -4.17620600 |
| H | 0.43261800  | -1.72336100 | -2.72020200 |
| C | 3.21951900  | -2.21500600 | -4.58888800 |
| H | 5.14735500  | -1.35975900 | -4.16776100 |
| H | 1.19560300  | -2.91879800 | -4.73827100 |
| H | 3.55598400  | -2.74386800 | -5.47252200 |
| C | -0.44184700 | 0.21440100  | -0.30343000 |
| C | -1.74903500 | -0.32065600 | 1.43435900  |
| C | -2.88523200 | -0.29662500 | 0.96722700  |
| C | -0.77087600 | -0.56436800 | 2.47630000  |
| C | -4.05561900 | -0.22807500 | 0.16920400  |
| C | 0.27346100  | 0.32573500  | 2.74646600  |
| C | -0.86774700 | -1.75249500 | 3.20850200  |
| C | -4.53993500 | 1.00714300  | -0.29249500 |
| C | -4.73492000 | -1.40596300 | -0.18544300 |
| C | 1.19347200  | 0.03183200  | 3.74418100  |

|   |             |             |             |
|---|-------------|-------------|-------------|
| H | 0.38031300  | 1.23486400  | 2.16377500  |
| C | 0.06463800  | -2.04659100 | 4.19313000  |
| H | -1.66652200 | -2.44650100 | 2.97803400  |
| C | -5.67480800 | 1.05472000  | -1.08738300 |
| H | -4.00800200 | 1.91361700  | -0.03126400 |
| C | -5.86874800 | -1.34554500 | -0.98017400 |
| H | -4.36016200 | -2.35689100 | 0.17400700  |
| H | 1.99311500  | 0.73323700  | 3.94923600  |
| H | -0.01147400 | -2.97759600 | 4.74205000  |
| C | -6.34302600 | -0.11696200 | -1.43310200 |
| H | -6.03835500 | 2.01116200  | -1.44325700 |
| H | -6.38574900 | -2.25902100 | -1.24845400 |
| H | -7.22922700 | -0.07337200 | -2.05446600 |
| C | 1.09642100  | -1.15459800 | 4.46527500  |
| H | 1.82487700  | -1.38412200 | 5.23386400  |

SCF Done: E(UM062X) = -1618.02365316 A.U.

<S\*\*2> = 1.0342

|                                          |                             |
|------------------------------------------|-----------------------------|
| Zero-point correction=                   | 0.547786 (Hartree/Particle) |
| Thermal correction to Energy=            | 0.673029                    |
| Thermal correction to Enthalpy=          | 0.674844                    |
| Thermal correction to Gibbs Free Energy= | 0.344581                    |

SCF Done: E(UB3LYP) = -1618.89839863 A.U.

<S\*\*2> = 0.9945

### RAD3-Ph

|   |             |             |             |
|---|-------------|-------------|-------------|
| C | 1.02237300  | 0.12293100  | -4.46577500 |
| C | 1.01447300  | 1.27133300  | -3.67792200 |
| C | 0.85987900  | -1.12227200 | -3.86650000 |
| H | 1.16685600  | 0.19839500  | -5.53705000 |
| C | 0.82897300  | 1.17804200  | -2.30479400 |
| H | 1.16018700  | 2.24358400  | -4.13382600 |
| C | 0.68167300  | -1.21625100 | -2.49168100 |
| H | 0.87123500  | -2.02286200 | -4.46960300 |
| C | 0.64260100  | -0.06623500 | -1.69432300 |
| H | 0.83307600  | 2.07633000  | -1.69776400 |
| H | 0.55581000  | -2.18968400 | -2.02867300 |
| C | -0.36999300 | 0.63972300  | 0.48675800  |
| C | -1.27334800 | 1.67327300  | -0.12878000 |
| C | -2.26194900 | 1.24066900  | -0.88274800 |
| C | -2.87912900 | 0.11819300  | -1.47573000 |
| C | -3.89935100 | -0.58804900 | -0.80197100 |
| C | -2.48524100 | -0.31971400 | -2.75885300 |

|   |             |             |             |
|---|-------------|-------------|-------------|
| C | -4.46656300 | -1.71438200 | -1.37377000 |
| H | -4.22271000 | -0.24510500 | 0.17338400  |
| C | -3.05887300 | -1.45042300 | -3.31566800 |
| H | -1.71317300 | 0.22667600  | -3.28910500 |
| C | -4.04463100 | -2.15648500 | -2.62729700 |
| H | -5.24094000 | -2.25382100 | -0.84069500 |
| H | -2.73068400 | -1.78767900 | -4.29182500 |
| H | -4.48755100 | -3.04128200 | -3.06799900 |
| C | -0.48743500 | 0.50287000  | 1.96548200  |
| C | 0.64946400  | 0.51644900  | 2.77754200  |
| C | -1.73967900 | 0.34297100  | 2.56039200  |
| C | 0.53838000  | 0.34304000  | 4.15081900  |
| H | 1.62184000  | 0.66033600  | 2.31915800  |
| C | -1.85029300 | 0.15559600  | 3.93212600  |
| H | -2.62560400 | 0.34595000  | 1.93557700  |
| C | -0.71165600 | 0.15211000  | 4.73063400  |
| H | 1.42792600  | 0.35795100  | 4.76996600  |
| H | -2.82687200 | 0.01224100  | 4.37928700  |
| H | -0.79861800 | 0.00917500  | 5.80114800  |
| C | -1.05274600 | 3.10581700  | 0.19735400  |
| C | -2.06066300 | 4.05369900  | -0.00698500 |
| C | 0.18339100  | 3.53153300  | 0.68824800  |
| C | -1.83290600 | 5.39410000  | 0.26444500  |
| H | -3.02534400 | 3.72377600  | -0.37680100 |
| C | 0.41102000  | 4.87677500  | 0.95904400  |
| H | 0.97192500  | 2.80465100  | 0.85246000  |
| C | -0.59465800 | 5.81130900  | 0.74817700  |
| H | -2.62350800 | 6.11781500  | 0.10451800  |
| H | 1.37638900  | 5.19307000  | 1.33590300  |
| H | -0.41873500 | 6.85873300  | 0.96230100  |
| C | 0.41177200  | -0.19030000 | -0.23414800 |
| C | 1.02859300  | -1.39654000 | 0.43070300  |
| C | 2.33442100  | -1.53730600 | 0.44482500  |
| C | 0.09180600  | -2.39370200 | 1.02047800  |
| C | 3.59705100  | -1.02685200 | 0.08038900  |
| C | -1.15139200 | -2.62064300 | 0.42256100  |
| C | 0.42913300  | -3.10102500 | 2.17538200  |
| C | 4.08505500  | -1.16175400 | -1.23838200 |
| C | 4.41756800  | -0.39931600 | 1.04331400  |
| C | -2.03320300 | -3.54729400 | 0.96453000  |
| H | -1.43556000 | -2.06685500 | -0.46769800 |
| C | -0.45659000 | -4.02283100 | 2.71861600  |
| H | 1.38242500  | -2.90256300 | 2.65268700  |
| C | 5.33516700  | -0.67110700 | -1.57294700 |

|   |             |             |             |
|---|-------------|-------------|-------------|
| H | 3.45821700  | -1.63687200 | -1.98324000 |
| C | 5.66446700  | 0.08851500  | 0.69288800  |
| H | 4.05612600  | -0.31195200 | 2.06136300  |
| H | -2.99087000 | -3.71308700 | 0.48429900  |
| H | -0.18891000 | -4.55770400 | 3.62230200  |
| C | 6.13021800  | -0.04475200 | -0.61424300 |
| H | 5.69424200  | -0.77192900 | -2.59025500 |
| H | 6.28108200  | 0.57288100  | 1.44069900  |
| H | 7.10782800  | 0.33537200  | -0.88422300 |
| C | -1.68961900 | -4.25000100 | 2.11462200  |
| H | -2.38145500 | -4.96581600 | 2.54282700  |

SCF Done: E(UM062X) = -1618.08181633 A.U.

<S\*\*2> = 1.0645

|                                          |                             |
|------------------------------------------|-----------------------------|
| Zero-point correction=                   | 0.551548 (Hartree/Particle) |
| Thermal correction to Energy=            | 0.675953                    |
| Thermal correction to Enthalpy=          | 0.677769                    |
| Thermal correction to Gibbs Free Energy= | 0.350263                    |

SCF Done: E(UB3LYP) = -1618.95239042 A.U.

<S\*\*2> = 1.0545

#### TS5-Ph

|   |             |             |             |
|---|-------------|-------------|-------------|
| C | -3.19376800 | -0.53439900 | -2.28235600 |
| C | -2.83164100 | -1.89571900 | -2.48943700 |
| C | -1.54409900 | -2.29635800 | -2.27532400 |
| C | -0.53185700 | -1.39951500 | -1.80051500 |
| C | -0.94713000 | -0.04296000 | -1.49799500 |
| C | -2.28033800 | 0.37293300  | -1.82888800 |
| C | 0.79362100  | -1.88701800 | -1.61718000 |
| C | 1.68781300  | -0.94923800 | -1.09036700 |
| H | -4.20902200 | -0.21415800 | -2.49314900 |
| H | -1.21707100 | -3.31144200 | -2.47077600 |
| H | -1.44306900 | -0.87609700 | -0.15134100 |
| H | -2.56520500 | 1.40937100  | -1.68818800 |
| C | -1.16120400 | 4.86085700  | 0.02249000  |
| C | -1.65332800 | 3.78474200  | 0.75404500  |
| C | -1.26677700 | 2.49013300  | 0.42751900  |
| C | -0.38166900 | 2.24796600  | -0.62658000 |
| C | 0.10416000  | 3.33500200  | -1.35261600 |
| C | -0.28205600 | 4.63120200  | -1.03022000 |
| C | 0.02956200  | 0.85136300  | -0.95032700 |
| C | 1.32718700  | 0.40430100  | -0.75535000 |
| H | -1.45615600 | 5.87228500  | 0.27543700  |

|   |             |             |             |
|---|-------------|-------------|-------------|
| H | -2.32872900 | 3.95666800  | 1.58483500  |
| H | -1.63154700 | 1.64741200  | 1.00874300  |
| H | 0.80222500  | 3.15667300  | -2.16270800 |
| H | 0.10961300  | 5.46522700  | -1.60045500 |
| H | -3.57533100 | -2.59649200 | -2.85184500 |
| C | 3.07868300  | -1.44774700 | -0.83841100 |
| C | 3.81285500  | -1.14816000 | 0.31501700  |
| C | 3.64363700  | -2.33440600 | -1.76263400 |
| C | 5.06896500  | -1.70634000 | 0.53048300  |
| H | 3.39470100  | -0.48833300 | 1.06518000  |
| C | 4.90469100  | -2.87752800 | -1.55889000 |
| H | 3.05053400  | -2.60442100 | -2.62771300 |
| C | 5.62542300  | -2.56688100 | -0.40870800 |
| H | 5.61385900  | -1.46309200 | 1.43602200  |
| H | 5.32392500  | -3.55386900 | -2.29544500 |
| H | 6.60760100  | -2.99567700 | -0.24513000 |
| C | 2.33627400  | 1.38128800  | -0.24573600 |
| C | 2.18278200  | 1.98593500  | 1.00338500  |
| C | 3.45075400  | 1.70748400  | -1.01958100 |
| C | 3.12516100  | 2.89247900  | 1.47222600  |
| H | 1.31957900  | 1.73279500  | 1.60947600  |
| C | 4.38874800  | 2.62227400  | -0.55637300 |
| H | 3.58444600  | 1.22522400  | -1.98205800 |
| C | 4.23083200  | 3.21552200  | 0.69206000  |
| H | 2.99497500  | 3.35014300  | 2.44628700  |
| H | 5.24932800  | 2.86650500  | -1.16818500 |
| H | 4.96542900  | 3.92450100  | 1.05558700  |
| C | -6.98085700 | -0.42324700 | 0.35191600  |
| C | -6.46736400 | -1.71635200 | 0.25724800  |
| C | -5.11937600 | -1.94246000 | 0.47200600  |
| C | -4.27805500 | -0.86188400 | 0.78503400  |
| C | -4.79990800 | 0.43839600  | 0.88774000  |
| C | -6.15045800 | 0.65030500  | 0.66788100  |
| H | -8.03622600 | -0.25110600 | 0.17725300  |
| H | -7.12126700 | -2.54345700 | 0.01125700  |
| H | -4.69494400 | -2.93511200 | 0.38647100  |
| H | -4.13346800 | 1.26258500  | 1.11283100  |
| H | -6.55822300 | 1.65088700  | 0.73681500  |
| C | -2.89943100 | -1.08226900 | 0.98810200  |
| C | -1.67060200 | -1.22166900 | 1.05953600  |
| C | -0.41843700 | -1.48533700 | 1.76491900  |
| C | 0.39140400  | -2.54870400 | 1.36478100  |
| C | -0.03841100 | -0.65132700 | 2.81860600  |
| C | 1.58242900  | -2.78286500 | 2.03969500  |

|   |             |             |            |
|---|-------------|-------------|------------|
| H | 0.12241100  | -3.15295200 | 0.50708900 |
| C | 1.15493500  | -0.89676400 | 3.48429400 |
| H | -0.67238600 | 0.17927300  | 3.10643900 |
| C | 1.96234400  | -1.96239700 | 3.09590600 |
| H | 2.23077700  | -3.58499000 | 1.70940000 |
| H | 1.45696800  | -0.25181800 | 4.30042900 |
| H | 2.90330500  | -2.14036900 | 3.60303300 |

SCF Done: E(RM062X) = -1618.02862417 A.U.

|                                          |                             |
|------------------------------------------|-----------------------------|
| Zero-point correction=                   | 0.545092 (Hartree/Particle) |
| Thermal correction to Energy=            | 0.669014                    |
| Thermal correction to Enthalpy=          | 0.670829                    |
| Thermal correction to Gibbs Free Energy= | 0.344562                    |

SCF Done: E(UB3LYP) = -1618.90401402 A.U.

<S\*\*2> = 0.4030

#### RAD1-Ph

|   |             |             |             |
|---|-------------|-------------|-------------|
| C | -3.45771300 | 3.38830700  | 0.06419900  |
| C | -2.51183300 | 4.43726400  | 0.01145800  |
| C | -1.17462900 | 4.15164700  | -0.03066700 |
| C | -0.73440000 | 2.80429200  | -0.03328900 |
| C | -1.67921000 | 1.73676900  | -0.00936400 |
| C | -3.05723800 | 2.07774100  | 0.05690200  |
| C | 0.61030500  | 2.43058000  | -0.04848800 |
| C | 1.11443100  | 1.17375500  | -0.05482500 |
| H | -4.51373500 | 3.62487200  | 0.11741500  |
| H | -0.43095700 | 4.93907600  | -0.05885900 |
| H | -3.79464500 | 1.28711700  | 0.11349800  |
| C | -4.00695300 | -2.86186100 | 0.13633000  |
| C | -3.96119600 | -2.03149000 | -0.97849100 |
| C | -3.06391600 | -0.97009800 | -1.02087100 |
| C | -2.19836300 | -0.72995900 | 0.04786800  |
| C | -2.25911500 | -1.56210500 | 1.16599600  |
| C | -3.15602100 | -2.62201600 | 1.20985400  |
| C | -1.20484000 | 0.38329500  | -0.01066600 |
| C | 0.15217900  | 0.10093000  | -0.02418800 |
| H | -4.70230500 | -3.69207700 | 0.16802100  |
| H | -4.62169900 | -2.21275100 | -1.81825700 |
| H | -3.02150400 | -0.32516700 | -1.89281900 |
| H | -1.58541300 | -1.38155000 | 1.99603300  |
| H | -3.18658500 | -3.26397500 | 2.08223600  |
| H | -2.85004400 | 5.46642600  | 0.01427700  |

|   |             |             |             |
|---|-------------|-------------|-------------|
| C | 2.58911100  | 0.97450800  | -0.11049400 |
| C | 3.18160200  | 0.07561800  | -1.00149500 |
| C | 3.41020800  | 1.73993100  | 0.72114100  |
| C | 4.56258300  | -0.05871200 | -1.04930300 |
| H | 2.55863900  | -0.51822300 | -1.65973500 |
| C | 4.79235300  | 1.60126600  | 0.67508300  |
| H | 2.95327300  | 2.43898800  | 1.41288800  |
| C | 5.37258600  | 0.69913100  | -0.20870000 |
| H | 5.00728000  | -0.75838800 | -1.74700700 |
| H | 5.41504100  | 2.19763300  | 1.33160500  |
| H | 6.44969400  | 0.58741900  | -0.24465700 |
| C | 0.63921400  | -1.30865400 | 0.02325800  |
| C | 0.29694100  | -2.22237400 | -0.97464400 |
| C | 1.45955200  | -1.72715400 | 1.07181000  |
| C | 0.76774300  | -3.52855200 | -0.92548300 |
| H | -0.34132600 | -1.90354400 | -1.79093000 |
| C | 1.92348000  | -3.03561400 | 1.12600700  |
| H | 1.73890000  | -1.01704700 | 1.84279600  |
| C | 1.58078400  | -3.93909300 | 0.12588500  |
| H | 0.49671300  | -4.22685300 | -1.70837700 |
| H | 2.55689700  | -3.34761500 | 1.94781500  |
| H | 1.94588600  | -4.95845000 | 0.16511000  |

SCF Done: E(UM062X) = -1078.16580857 A.U.

<S\*\*2> = 0.7663

|                                          |                             |
|------------------------------------------|-----------------------------|
| Zero-point correction=                   | 0.358360 (Hartree/Particle) |
| Thermal correction to Energy=            | 0.437347                    |
| Thermal correction to Enthalpy=          | 0.439162                    |
| Thermal correction to Gibbs Free Energy= | 0.215878                    |

SCF Done: E(UB3LYP) = -1078.73418626 A.U.

<S\*\*2> = 0.7596

#### **RAD2-Ph**

|   |             |             |             |
|---|-------------|-------------|-------------|
| H | 0.92913400  | -2.49546100 | -0.00262700 |
| C | -3.72628900 | 0.36220300  | -1.20765000 |
| C | -2.46024400 | -0.18486200 | -1.22209600 |
| C | -1.78629500 | -0.47550400 | -0.00028400 |
| C | -2.46062500 | -0.18759000 | 1.22198800  |
| C | -3.72664100 | 0.35951000  | 1.20830000  |
| C | -4.37162700 | 0.63915600  | 0.00052500  |
| H | -4.22369900 | 0.57800900  | -2.14591600 |
| H | -1.95817700 | -0.40052300 | -2.15696300 |
| H | -1.95881900 | -0.40544000 | 2.15650000  |



|   |             |             |             |
|---|-------------|-------------|-------------|
| H | -4.22434100 | 0.57316600  | 2.14690200  |
| H | -5.36623800 | 1.06667700  | 0.00088500  |
| C | 0.71445700  | -1.42414400 | -0.00143200 |
| C | -0.52687800 | -1.02652500 | -0.00087200 |
| C | 1.90385100  | -0.53897300 | -0.00057300 |
| C | 1.78208200  | 0.85393800  | 0.00013500  |
| C | 3.17881900  | -1.10535000 | -0.00049800 |
| C | 2.91223400  | 1.65687900  | 0.00094600  |
| H | 0.79270200  | 1.29909700  | 0.00005900  |
| C | 4.31215400  | -0.29962000 | 0.00029200  |
| H | 3.28101500  | -2.18545700 | -0.00106300 |
| C | 4.18227500  | 1.08334600  | 0.00101500  |
| H | 2.80497900  | 2.73519600  | 0.00152200  |
| H | 5.29609000  | -0.75338200 | 0.00035200  |
| H | 5.06371800  | 1.71332700  | 0.00157200  |

SCF Done: E(UM062X) = -539.922858211 A.U.

<S\*\*2> = 0.7878

|                                          |                             |
|------------------------------------------|-----------------------------|
| Zero-point correction=                   | 0.190985 (Hartree/Particle) |
| Thermal correction to Energy=            | 0.232174                    |
| Thermal correction to Enthalpy=          | 0.233989                    |
| Thermal correction to Gibbs Free Energy= | 0.091207                    |

SCF Done: E(UB3LYP) = -540.219134639 A.U.

<S\*\*2> = 0.7846

#### TS6-Ph

|   |             |             |             |
|---|-------------|-------------|-------------|
| C | -0.74226100 | 0.29490100  | 0.04634200  |
| C | -1.22717400 | -0.93932100 | 0.14304600  |
| C | 1.22727100  | -0.93925300 | -0.14297500 |
| C | 0.74229800  | 0.29494200  | -0.04626200 |
| C | 2.41413600  | -1.72438700 | -0.10030100 |
| C | 2.79600300  | -2.51730100 | -1.19805200 |
| C | 3.20821800  | -1.74801400 | 1.06265100  |
| C | 3.94234800  | -3.29291700 | -1.13756600 |
| H | 2.17767500  | -2.51248400 | -2.08795600 |
| C | 4.35341300  | -2.52690800 | 1.11179900  |
| H | 2.91306900  | -1.14113900 | 1.91048000  |
| C | 4.72485800  | -3.30181200 | 0.01535700  |
| H | 4.22810500  | -3.89662400 | -1.99084400 |
| H | 4.96097200  | -2.53130500 | 2.00914900  |
| H | 5.61884600  | -3.91213500 | 0.05915700  |
| C | -2.41404200 | -1.72445300 | 0.10032900  |
| C | -3.20813000 | -1.74799000 | -1.06261900 |

|   |             |             |             |
|---|-------------|-------------|-------------|
| C | -2.79590400 | -2.51744900 | 1.19802200  |
| C | -4.35333100 | -2.52687000 | -1.11181900 |
| H | -2.91297900 | -1.14105500 | -1.91040600 |
| C | -3.94225600 | -3.29305000 | 1.13748700  |
| H | -2.17756700 | -2.51271000 | 2.08792100  |
| C | -4.72477500 | -3.30185300 | -0.01543100 |
| H | -4.96089200 | -2.53120200 | -2.00916800 |
| H | -4.22801400 | -3.89681600 | 1.99072300  |
| H | -5.61876700 | -3.91216600 | -0.05927000 |
| C | 1.61486900  | 1.49361800  | 0.04409800  |
| C | 1.31444100  | 2.53506200  | 0.92786100  |
| C | 2.77850800  | 1.57425000  | -0.72598500 |
| C | 2.16531600  | 3.62776400  | 1.04019300  |
| H | 0.41329000  | 2.48520600  | 1.52862600  |
| C | 3.62694800  | 2.66747500  | -0.61133200 |
| H | 3.01113900  | 0.77260300  | -1.41789000 |
| C | 3.32261000  | 3.69831400  | 0.27156200  |
| H | 1.92292900  | 4.42695600  | 1.73058800  |
| H | 4.52504000  | 2.71563900  | -1.21578700 |
| H | 3.98278800  | 4.55297200  | 0.35860700  |
| C | -1.61490300 | 1.49352300  | -0.04405300 |
| C | -1.31458200 | 2.53491800  | -0.92791000 |
| C | -2.77850500 | 1.57414200  | 0.72608500  |
| C | -2.16552900 | 3.62755900  | -1.04028000 |
| H | -0.41345600 | 2.48507100  | -1.52871200 |
| C | -3.62702000 | 2.66730600  | 0.61139100  |
| H | -3.01105200 | 0.77253100  | 1.41806000  |
| C | -3.32278900 | 3.69809600  | -0.27159600 |
| H | -1.92322400 | 4.42671700  | -1.73074400 |
| H | -4.52508500 | 2.71545800  | 1.21588600  |
| H | -3.98302400 | 4.55270700  | -0.35867400 |

SCF Done: E(UM062X) = -1078.65404318 A.U.

<S\*\*2> = 0.8590

|                                          |                             |
|------------------------------------------|-----------------------------|
| Zero-point correction=                   | 0.365267 (Hartree/Particle) |
| Thermal correction to Energy=            | 0.446417                    |
| Thermal correction to Enthalpy=          | 0.448232                    |
| Thermal correction to Gibbs Free Energy= | 0.213263                    |

SCF Done: E(UB3LYP) = -1079.23745899 A.U.

<S\*\*2> = 0.6402

#### INT3-Ph

|   |             |            |             |
|---|-------------|------------|-------------|
| C | -0.02300800 | 1.03158700 | -0.00473900 |
|---|-------------|------------|-------------|

|   |             |             |             |
|---|-------------|-------------|-------------|
| C | 1.01703100  | 0.17465600  | 0.00583900  |
| C | 0.02300800  | -1.03158700 | -0.00473900 |
| C | -1.01703100 | -0.17465600 | 0.00583900  |
| C | 0.19765400  | -2.47492300 | -0.01958600 |
| C | 1.28782200  | -3.05982700 | 0.63870500  |
| C | -0.71306200 | -3.30563700 | -0.68957600 |
| C | 1.45339100  | -4.43960500 | 0.63825000  |
| H | 1.99439700  | -2.42601900 | 1.16226000  |
| C | -0.54160400 | -4.68100200 | -0.68803100 |
| H | -1.54585200 | -2.85602900 | -1.21869200 |
| C | 0.54160400  | -5.25375800 | -0.02357400 |
| H | 2.29728800  | -4.87938000 | 1.15647700  |
| H | -1.24886600 | -5.31078000 | -1.21462600 |
| H | 0.67429000  | -6.32894300 | -0.02672800 |
| C | -2.46685100 | -0.27990700 | 0.02065600  |
| C | -3.25190600 | 0.68784800  | -0.62023900 |
| C | -3.10589200 | -1.34574700 | 0.67283300  |
| C | -4.63779000 | 0.58325900  | -0.62136600 |
| H | -2.76716600 | 1.51323300  | -1.12914600 |
| C | -4.48825200 | -1.44344400 | 0.66977900  |
| H | -2.50446900 | -2.08553800 | 1.18902400  |
| C | -5.26007000 | -0.48045200 | 0.02183100  |
| H | -5.23162100 | 1.33490700  | -1.12776200 |
| H | -4.96961800 | -2.26873800 | 1.18126200  |
| H | -6.34058900 | -0.55896800 | 0.02324100  |
| C | -0.19765400 | 2.47492300  | -0.01958600 |
| C | -1.28782200 | 3.05982700  | 0.63870500  |
| C | 0.71306200  | 3.30563700  | -0.68957600 |
| C | -1.45339100 | 4.43960500  | 0.63825000  |
| H | -1.99439700 | 2.42601900  | 1.16226000  |
| C | 0.54160400  | 4.68100200  | -0.68803100 |
| H | 1.54585200  | 2.85602900  | -1.21869200 |
| C | -0.54160400 | 5.25375800  | -0.02357400 |
| H | -2.29728800 | 4.87938000  | 1.15647700  |
| H | 1.24886600  | 5.31078000  | -1.21462600 |
| H | -0.67429000 | 6.32894300  | -0.02672800 |
| C | 2.46685100  | 0.27990700  | 0.02065600  |
| C | 3.25190600  | -0.68784800 | -0.62023900 |
| C | 3.10589200  | 1.34574700  | 0.67283300  |
| C | 4.63779000  | -0.58325900 | -0.62136600 |
| H | 2.76716600  | -1.51323300 | -1.12914600 |
| C | 4.48825200  | 1.44344400  | 0.66977900  |
| H | 2.50446900  | 2.08553800  | 1.18902400  |
| C | 5.26007000  | 0.48045200  | 0.02183100  |

|   |            |             |             |
|---|------------|-------------|-------------|
| H | 5.23162100 | -1.33490700 | -1.12776200 |
| H | 4.96961800 | 2.26873800  | 1.18126200  |
| H | 6.34058900 | 0.55896800  | 0.02324100  |

SCF Done: E(RM062X) = -1078.73574715 A.U.

|                                          |                             |
|------------------------------------------|-----------------------------|
| Zero-point correction=                   | 0.368263 (Hartree/Particle) |
| Thermal correction to Energy=            | 0.449321                    |
| Thermal correction to Enthalpy=          | 0.451136                    |
| Thermal correction to Gibbs Free Energy= | 0.223878                    |

SCF Done: E(RB3LYP) = -1079.30814689 A.U.

### TS7-Ph

|   |             |             |             |
|---|-------------|-------------|-------------|
| C | -2.08896800 | 0.04733000  | 1.47830900  |
| C | -0.85162200 | 0.09918600  | 1.39067200  |
| C | 0.38203000  | -0.13319600 | 2.13257100  |
| C | 1.08962800  | 0.93394300  | 2.69128900  |
| C | 0.86550700  | -1.43529500 | 2.29121300  |
| C | 2.24490100  | 0.69839300  | 3.42745800  |
| H | 0.72261000  | 1.94445600  | 2.55909700  |
| C | 2.02872000  | -1.66381900 | 3.01621900  |
| H | 0.31900300  | -2.25903400 | 1.84587700  |
| C | 2.71651900  | -0.60044300 | 3.59251500  |
| H | 2.77619100  | 1.53230800  | 3.87089900  |
| H | 2.39782800  | -2.67592300 | 3.13137600  |
| H | 3.61998500  | -0.78356700 | 4.16218300  |
| C | 1.12972000  | 0.96563200  | -0.55103500 |
| C | 1.63176900  | -0.38731800 | -0.79649600 |
| C | -0.23131600 | 0.49447200  | -0.60251600 |
| C | 0.34586300  | -0.88801400 | -0.91143800 |
| C | -0.27845600 | -2.18599700 | -0.99849400 |
| C | 0.47581700  | -3.37448500 | -0.96156200 |
| C | -1.67857200 | -2.28887400 | -1.07440700 |
| C | -0.14811900 | -4.60977700 | -1.02113300 |
| H | 1.55252600  | -3.31959300 | -0.86081000 |
| C | -2.29500300 | -3.53067200 | -1.14251000 |
| H | -2.28036700 | -1.38738200 | -1.07642900 |
| C | -1.53593000 | -4.69671500 | -1.12136900 |
| H | 0.44964500  | -5.51316500 | -0.98680400 |
| H | -3.37602300 | -3.58560000 | -1.20996700 |
| H | -2.01928200 | -5.66468700 | -1.17607500 |
| C | -1.35686800 | 1.14980600  | -1.30773700 |

|   |             |             |             |
|---|-------------|-------------|-------------|
| C | -2.08892100 | 2.19987200  | -0.75055300 |
| C | -1.69062800 | 0.71864200  | -2.59734300 |
| C | -3.11515700 | 2.81057300  | -1.46108700 |
| H | -1.87362200 | 2.51761600  | 0.26156900  |
| C | -2.71601400 | 1.32864100  | -3.30849700 |
| H | -1.13396200 | -0.09990100 | -3.04210400 |
| C | -3.43293800 | 2.37782200  | -2.74250700 |
| H | -3.67513800 | 3.61918400  | -1.00555600 |
| H | -2.95599900 | 0.98241900  | -4.30685700 |
| H | -4.23674800 | 2.85043600  | -3.29418900 |
| C | -3.49417700 | -0.00067400 | 1.39175900  |
| C | -4.28116900 | 1.15551200  | 1.56310700  |
| C | -4.14055200 | -1.23086900 | 1.15502900  |
| C | -5.66031600 | 1.08145900  | 1.47733600  |
| H | -3.79203900 | 2.10154500  | 1.75998900  |
| C | -5.52184300 | -1.28992600 | 1.06880800  |
| H | -3.53882700 | -2.12567400 | 1.05310200  |
| C | -6.28796000 | -0.13733600 | 1.22459100  |
| H | -6.25311200 | 1.97904800  | 1.60722100  |
| H | -6.00631500 | -2.24201900 | 0.88654900  |
| H | -7.36779900 | -0.18822000 | 1.15676700  |
| C | 1.75488400  | 2.25804300  | -0.46981800 |
| C | 3.06093200  | 2.45386500  | -0.95823900 |
| C | 1.08189500  | 3.36016300  | 0.08667100  |
| C | 3.66029000  | 3.70160500  | -0.89121700 |
| H | 3.59000500  | 1.62372900  | -1.41007200 |
| C | 1.68813100  | 4.60433500  | 0.15178500  |
| H | 0.08455200  | 3.22251200  | 0.48265600  |
| C | 2.98099400  | 4.78265700  | -0.33467200 |
| H | 4.66299500  | 3.83387300  | -1.28035000 |
| H | 1.15338800  | 5.43993200  | 0.58795200  |
| H | 3.45415600  | 5.75565500  | -0.28095600 |
| C | 2.98636700  | -0.94133300 | -0.76158300 |
| C | 3.85137800  | -0.53504100 | 0.26150500  |
| C | 3.44694500  | -1.84765200 | -1.72211600 |
| C | 5.13944500  | -1.04611900 | 0.33637800  |
| H | 3.49272300  | 0.17195600  | 1.00226500  |
| C | 4.73993000  | -2.35114500 | -1.64820000 |
| H | 2.78861700  | -2.14402800 | -2.53149000 |
| C | 5.58738400  | -1.95567100 | -0.61729000 |
| H | 5.79410700  | -0.73435600 | 1.14181000  |
| H | 5.08950100  | -3.04927300 | -2.39967700 |
| H | 6.59428000  | -2.35170400 | -0.56035700 |

SCF Done: E(UM062X) = -1618.07281077 A.U.  
 <S\*\*2> = 0.8528  
 Zero-point correction= 0.548851 (Hartree/Particle)  
 Thermal correction to Energy= 0.672719  
 Thermal correction to Enthalpy= 0.674534  
 Thermal correction to Gibbs Free Energy= 0.352196

SCF Done: E(UB3LYP) = -1618.94378898 A.U.  
 <S\*\*2> = 0.8664

**INT4-Ph**

|   |             |             |             |
|---|-------------|-------------|-------------|
| C | -2.22000100 | 0.21701100  | 0.98180800  |
| C | -0.93142000 | 0.28464000  | 0.81889500  |
| C | -0.02770300 | 0.00808900  | 1.99208400  |
| C | 0.61918900  | 1.04326100  | 2.66684400  |
| C | 0.19217100  | -1.31072400 | 2.39136400  |
| C | 1.47989600  | 0.76193400  | 3.72282200  |
| H | 0.45231500  | 2.06968000  | 2.36147700  |
| C | 1.05795500  | -1.59113200 | 3.44301100  |
| H | -0.31383400 | -2.11386700 | 1.86560100  |
| C | 1.70485800  | -0.55559200 | 4.10984100  |
| H | 1.97525400  | 1.57448400  | 4.24154900  |
| H | 1.22578000  | -2.61930400 | 3.74094000  |
| H | 2.37732400  | -0.77406300 | 4.93106000  |
| C | 1.19287700  | 0.95652000  | -0.46539700 |
| C | 1.72962200  | -0.32712300 | -0.64327400 |
| C | -0.24617200 | 0.41683000  | -0.55727800 |
| C | 0.47598100  | -0.91647400 | -0.82362200 |
| C | -0.06251100 | -2.23621900 | -0.98944700 |
| C | 0.74858500  | -3.38452700 | -0.89973500 |
| C | -1.44347200 | -2.40272000 | -1.21125300 |
| C | 0.19375800  | -4.64724200 | -1.02884400 |
| H | 1.80964900  | -3.27293800 | -0.70988000 |
| C | -1.98759500 | -3.67203700 | -1.33982000 |
| H | -2.08019800 | -1.52808300 | -1.29141600 |
| C | -1.17460200 | -4.79919800 | -1.24993500 |
| H | 0.82957200  | -5.52166000 | -0.95408800 |
| H | -3.05146000 | -3.78256400 | -1.51644000 |
| H | -1.60280600 | -5.78910300 | -1.35209600 |
| C | -1.08723900 | 0.98116000  | -1.68681500 |
| C | -2.10328600 | 1.91654100  | -1.48253100 |
| C | -0.80420500 | 0.58834300  | -2.99790200 |
| C | -2.82143500 | 2.43497500  | -2.55508900 |
| H | -2.34473800 | 2.24521600  | -0.47950500 |

|   |             |             |             |
|---|-------------|-------------|-------------|
| C | -1.51870200 | 1.10559400  | -4.06992800 |
| H | -0.01742200 | -0.13716400 | -3.17512700 |
| C | -2.53470000 | 2.03020000  | -3.85227900 |
| H | -3.60982700 | 3.15547500  | -2.37174600 |
| H | -1.28380600 | 0.78218300  | -5.07709700 |
| H | -3.09726300 | 2.43100900  | -4.68693500 |
| C | -3.57802700 | 0.11745200  | 1.17334300  |
| C | -4.36928800 | 1.25605000  | 1.49803900  |
| C | -4.23527100 | -1.14036400 | 1.04214600  |
| C | -5.73218100 | 1.13254500  | 1.67370800  |
| H | -3.88138500 | 2.21629200  | 1.61600100  |
| C | -5.59927400 | -1.23698400 | 1.22363900  |
| H | -3.63996400 | -2.01412800 | 0.80331100  |
| C | -6.36085200 | -0.10785100 | 1.53805700  |
| H | -6.31852700 | 2.00901200  | 1.92421200  |
| H | -6.08269400 | -2.20173100 | 1.12200700  |
| H | -7.43081000 | -0.19425600 | 1.67930600  |
| C | 1.70635000  | 2.28068200  | -0.28196200 |
| C | 3.08709100  | 2.55272600  | -0.35710200 |
| C | 0.82728000  | 3.34833900  | -0.01916700 |
| C | 3.56014400  | 3.83950700  | -0.16350300 |
| H | 3.77779100  | 1.74674700  | -0.57386900 |
| C | 1.31030600  | 4.63273400  | 0.17325300  |
| H | -0.23762600 | 3.15469700  | 0.03507100  |
| C | 2.67831000  | 4.88566600  | 0.10466700  |
| H | 4.62464300  | 4.03269600  | -0.22472300 |
| H | 0.61852700  | 5.44217800  | 0.37448000  |
| H | 3.05524100  | 5.89026300  | 0.25326700  |
| C | 3.09503800  | -0.86672100 | -0.51394600 |
| C | 3.74926300  | -0.73321300 | 0.71383300  |
| C | 3.73319700  | -1.52038600 | -1.56862600 |
| C | 5.02913300  | -1.24745400 | 0.87989000  |
| H | 3.23938500  | -0.23166900 | 1.53183700  |
| C | 5.01591600  | -2.02985000 | -1.39926500 |
| H | 3.22027700  | -1.62587000 | -2.51854100 |
| C | 5.66499500  | -1.89376600 | -0.17637700 |
| H | 5.52941500  | -1.14559600 | 1.83568700  |
| H | 5.50945200  | -2.53221100 | -2.22287500 |
| H | 6.66386500  | -2.29306200 | -0.04634600 |

SCF Done: E(UM062X) = -1618.10714549 A.U.

<S\*\*2> = 1.0720

Zero-point correction= 0.551229 (Hartree/Particle)

Thermal correction to Energy= 0.675298

Thermal correction to Enthalpy= 0.677113  
Thermal correction to Gibbs Free Energy= 0.352355

SCF Done: E(UB3LYP) = -1618.97428006 A.U.  
<S\*\*2> = 1.0680

**TS8-Ph**

|   |             |             |             |
|---|-------------|-------------|-------------|
| C | -0.61690400 | -1.23029000 | -1.25953900 |
| C | 0.59433900  | -1.17652600 | -0.77846900 |
| C | 1.81501500  | -1.56074800 | -1.55034500 |
| C | 2.79971400  | -2.42130700 | -1.05640500 |
| C | 1.99934300  | -0.98627500 | -2.81178500 |
| C | 3.94046200  | -2.68919900 | -1.80485300 |
| H | 2.68787800  | -2.87902500 | -0.08301200 |
| C | 3.14032100  | -1.25367100 | -3.55684400 |
| H | 1.24336400  | -0.30853500 | -3.19228100 |
| C | 4.11841800  | -2.10401200 | -3.05348100 |
| H | 4.69275400  | -3.36063300 | -1.40762900 |
| H | 3.26893000  | -0.79068800 | -4.52816500 |
| H | 5.01161600  | -2.31186500 | -3.63045200 |
| C | 0.98282500  | 1.03178100  | 0.37100700  |
| C | -0.35607300 | 1.40562400  | 0.51870000  |
| C | 0.65266700  | -0.44174500 | 0.57693100  |
| C | -0.79507600 | 0.09890600  | 0.79166500  |
| C | -2.06467700 | -0.48186300 | 1.17411100  |
| C | -3.26182900 | 0.12996100  | 0.75434800  |
| C | -2.15095000 | -1.68290500 | 1.89532100  |
| C | -4.49032000 | -0.43687600 | 1.05446300  |
| H | -3.21836400 | 1.03620500  | 0.16205300  |
| C | -3.38686400 | -2.24133100 | 2.19509400  |
| H | -1.24618200 | -2.16221800 | 2.24445700  |
| C | -4.56183400 | -1.62514100 | 1.77787500  |
| H | -5.39776900 | 0.04308600  | 0.70696200  |
| H | -3.43006000 | -3.16337200 | 2.76348200  |
| H | -5.52343100 | -2.06728100 | 2.00922900  |
| C | 1.30237400  | -1.18428400 | 1.72234800  |
| C | 1.17497300  | -2.57246200 | 1.82903900  |
| C | 1.97799300  | -0.49784700 | 2.73210500  |
| C | 1.70705600  | -3.25763500 | 2.91362300  |
| H | 0.64785000  | -3.11527600 | 1.04969500  |
| C | 2.51206900  | -1.18265500 | 3.81904500  |
| H | 2.08711300  | 0.57867400  | 2.66690400  |
| C | 2.38038500  | -2.56237600 | 3.91391600  |
| H | 1.59732200  | -4.33402000 | 2.97742600  |



|   |             |             |             |
|---|-------------|-------------|-------------|
| H | 3.03574800  | -0.63353800 | 4.59266800  |
| H | 2.80055800  | -3.09369700 | 4.75943900  |
| C | -1.88731500 | -1.36528900 | -1.78526000 |
| C | -2.67885900 | -2.49789000 | -1.46144100 |
| C | -2.48328600 | -0.32038600 | -2.53990900 |
| C | -3.99552900 | -2.57086800 | -1.87432400 |
| H | -2.23807100 | -3.29077500 | -0.86999900 |
| C | -3.79715600 | -0.42079800 | -2.95299300 |
| H | -1.89441500 | 0.55979500  | -2.77174900 |
| C | -4.56449700 | -1.54077300 | -2.62322400 |
| H | -4.58969000 | -3.43653900 | -1.60557000 |
| H | -4.23778800 | 0.38387800  | -3.53009600 |
| H | -5.59649100 | -1.60628500 | -2.94481200 |
| C | 2.23274700  | 1.71093500  | 0.13818900  |
| C | 2.31133300  | 3.11766800  | 0.12722100  |
| C | 3.42009200  | 0.97765300  | -0.03915300 |
| C | 3.52325000  | 3.75539200  | -0.08146200 |
| H | 1.41709400  | 3.70390600  | 0.29832700  |
| C | 4.62728500  | 1.62419800  | -0.25419500 |
| H | 3.38952200  | -0.10412300 | -0.01066800 |
| C | 4.68650700  | 3.01459000  | -0.28150800 |
| H | 3.56327100  | 4.83831300  | -0.08475500 |
| H | 5.52746800  | 1.03863900  | -0.39905700 |
| H | 5.63125300  | 3.51761000  | -0.44908500 |
| C | -1.07794000 | 2.68516300  | 0.38838800  |
| C | -0.97206200 | 3.43360500  | -0.78631800 |
| C | -1.89177000 | 3.15024300  | 1.42327600  |
| C | -1.66628600 | 4.62969900  | -0.92269500 |
| H | -0.33646500 | 3.07067200  | -1.58751900 |
| C | -2.58154300 | 4.34868500  | 1.28701400  |
| H | -1.98113700 | 2.56267100  | 2.33044800  |
| C | -2.47079600 | 5.09013500  | 0.11479500  |
| H | -1.57993800 | 5.20203200  | -1.83872600 |
| H | -3.20751800 | 4.70388200  | 2.09689100  |
| H | -3.01002800 | 6.02399300  | 0.00998200  |

SCF Done: E(UM062X) = -1618.10412662 A.U.

<S\*\*2> = 0.7003

|                                          |                             |
|------------------------------------------|-----------------------------|
| Zero-point correction=                   | 0.550903 (Hartree/Particle) |
| Thermal correction to Energy=            | 0.673561                    |
| Thermal correction to Enthalpy=          | 0.675376                    |
| Thermal correction to Gibbs Free Energy= | 0.354885                    |

SCF Done: E(UB3LYP) = -1618.97355066 A.U.

<S\*\*2> = 0.5527

**INT5-Ph**

|   |             |             |             |
|---|-------------|-------------|-------------|
| C | 0.85185900  | -1.18479100 | -0.33815500 |
| C | -0.48421500 | -1.36565700 | -0.35371700 |
| C | -1.41629800 | -2.28896500 | -1.00782400 |
| C | -1.08759900 | -2.91238500 | -2.21848500 |
| C | -2.67902400 | -2.52615000 | -0.45006000 |
| C | -1.98995800 | -3.76236500 | -2.84171700 |
| H | -0.12575100 | -2.70978700 | -2.67549400 |
| C | -3.57912200 | -3.37988500 | -1.07654700 |
| H | -2.95112300 | -2.04193200 | 0.48113200  |
| C | -3.23716800 | -4.00344100 | -2.27083500 |
| H | -1.72399600 | -4.23227700 | -3.78121700 |
| H | -4.54994000 | -3.55691300 | -0.62867700 |
| H | -3.93984800 | -4.66813100 | -2.75898700 |
| C | 0.79087900  | 0.11205400  | 0.46838100  |
| C | 0.48429400  | 1.36530900  | -0.35493600 |
| C | -0.79093300 | -0.11167300 | 0.46835000  |
| C | -0.85179300 | 1.18446600  | -0.33936800 |
| C | -2.01837600 | 1.87410600  | -0.89383200 |
| C | -2.03133800 | 3.26404300  | -1.06477800 |
| C | -3.16536800 | 1.14130500  | -1.21514600 |
| C | -3.15716700 | 3.89915400  | -1.56964700 |
| H | -1.15582300 | 3.84100800  | -0.78744500 |
| C | -4.28803900 | 1.77940600  | -1.72745500 |
| H | -3.16689500 | 0.06616200  | -1.07091100 |
| C | -4.28702400 | 3.15827800  | -1.90799300 |
| H | -3.15709100 | 4.97554900  | -1.69455000 |
| H | -5.16637600 | 1.19851000  | -1.98285700 |
| H | -5.16453800 | 3.65568900  | -2.30334400 |
| C | -1.49282500 | -0.22353100 | 1.78516300  |
| C | -1.30208900 | -1.36619900 | 2.57050300  |
| C | -2.26031500 | 0.82156500  | 2.29952700  |
| C | -1.85833900 | -1.45683200 | 3.83772900  |
| H | -0.70175900 | -2.18208500 | 2.18091000  |
| C | -2.82660700 | 0.72538600  | 3.56837000  |
| H | -2.41804500 | 1.71669000  | 1.70906300  |
| C | -2.62633800 | -0.41005000 | 4.34139400  |
| H | -1.69099300 | -2.34529700 | 4.43515100  |
| H | -3.42371000 | 1.54489500  | 3.95082700  |
| H | -3.06378800 | -0.48245700 | 5.33004700  |
| C | 2.01836400  | -1.87498700 | -0.89209200 |
| C | 3.16536500  | -1.14260000 | -1.21433100 |

|   |            |             |             |
|---|------------|-------------|-------------|
| C | 2.03110900 | -3.26506800 | -1.06183600 |
| C | 4.28784900 | -1.78129900 | -1.72628700 |
| H | 3.16700500 | -0.06731400 | -1.07116000 |
| C | 3.15675300 | -3.90076900 | -1.56639800 |
| H | 1.15556800 | -3.84169200 | -0.78386800 |
| C | 4.28663200 | -3.16033500 | -1.90561200 |
| H | 5.16621100 | -1.20073800 | -1.98237000 |
| H | 3.15646700 | -4.97727100 | -1.69039000 |
| H | 5.16401400 | -3.65817400 | -2.30071900 |
| C | 1.49256000 | 0.22513800  | 1.78519600  |
| C | 2.26058800 | -0.81919600 | 2.30026700  |
| C | 1.30130900 | 1.36830200  | 2.56970400  |
| C | 2.82698700 | -0.72175900 | 3.56898900  |
| H | 2.41870400 | -1.71469900 | 1.71047800  |
| C | 1.85765700 | 1.46018100  | 3.83679300  |
| H | 0.70051600 | 2.18358200  | 2.17957200  |
| C | 2.62625900 | 0.41416800  | 4.34115700  |
| H | 3.42455400 | -1.54066700 | 3.95200200  |
| H | 1.68989500 | 2.34901700  | 4.43354600  |
| H | 3.06381400 | 0.48753300  | 5.32969700  |
| C | 1.41649300 | 2.28806600  | -1.00960700 |
| C | 1.08781300 | 2.91124100  | -2.22039400 |
| C | 2.67943200 | 2.52502600  | -0.45215900 |
| C | 1.99033400 | 3.76075300  | -2.84403400 |
| H | 0.12585700 | 2.70879000  | -2.67724400 |
| C | 3.57968600 | 3.37828100  | -1.07904800 |
| H | 2.95157100 | 2.04102200  | 0.47913200  |
| C | 3.23771500 | 4.00161800  | -2.27345300 |
| H | 1.72435800 | 4.23044700  | -3.78364000 |
| H | 4.55064300 | 3.55512100  | -0.63140600 |
| H | 3.94049600 | 4.66596500  | -2.76192300 |

SCF Done: E(RM062X) = -1618.19179312 A.U.

|                                          |                             |
|------------------------------------------|-----------------------------|
| Zero-point correction=                   | 0.554942 (Hartree/Particle) |
| Thermal correction to Energy=            | 0.677153                    |
| Thermal correction to Enthalpy=          | 0.678968                    |
| Thermal correction to Gibbs Free Energy= | 0.360225                    |

SCF Done: E(RB3LYP) = -1619.04634017 A.U.

#### TS9-Ph

|   |             |            |             |
|---|-------------|------------|-------------|
| C | -1.13456400 | 0.92452300 | -0.15982200 |
|---|-------------|------------|-------------|

|   |             |             |             |
|---|-------------|-------------|-------------|
| C | -0.00701300 | 1.59847900  | 0.41289400  |
| C | 0.81746800  | 2.60611500  | -0.24859900 |
| C | 0.56357100  | 3.04436200  | -1.55887600 |
| C | 1.93153900  | 3.12655500  | 0.42537500  |
| C | 1.40043000  | 3.96661100  | -2.16608800 |
| H | -0.28554600 | 2.64264800  | -2.09986700 |
| C | 2.78332800  | 4.02979300  | -0.19714500 |
| H | 2.11553500  | 2.81928300  | 1.44946400  |
| C | 2.51729200  | 4.45891300  | -1.49191600 |
| H | 1.19187500  | 4.29455600  | -3.17780100 |
| H | 3.64817500  | 4.40845400  | 0.33469500  |
| H | 3.17245700  | 5.17441300  | -1.97430300 |
| C | -0.88606800 | -0.46669100 | -0.23706400 |
| C | 0.54346800  | -0.96732300 | -0.29725800 |
| C | 0.56102900  | 0.60486300  | 1.26148300  |
| C | 1.44455100  | -0.29162400 | 0.45881300  |
| C | 2.90935500  | -0.32086100 | 0.49430100  |
| C | 3.55278800  | 0.04308600  | 1.68364000  |
| C | 3.69123500  | -0.67514500 | -0.61338600 |
| C | 4.93863300  | 0.03359800  | 1.77380300  |
| H | 2.95173300  | 0.32552200  | 2.54219800  |
| C | 5.07524400  | -0.67707200 | -0.52078800 |
| H | 3.21220600  | -0.92866900 | -1.55041200 |
| C | 5.70457900  | -0.32898300 | 0.67164800  |
| H | 5.42040700  | 0.31055500  | 2.70396800  |
| H | 5.66795700  | -0.94407000 | -1.38787800 |
| H | 6.78603300  | -0.33343000 | 0.73726100  |
| C | -0.13459600 | 0.11636500  | 2.44598100  |
| C | -1.03822100 | 0.96134800  | 3.11223700  |
| C | 0.12439400  | -1.15222400 | 2.99589100  |
| C | -1.71163800 | 0.52593600  | 4.24586400  |
| H | -1.18807500 | 1.96597600  | 2.73511100  |
| C | -0.54397200 | -1.57699700 | 4.13128000  |
| H | 0.84039600  | -1.80427300 | 2.50804800  |
| C | -1.47168600 | -0.74468700 | 4.75739000  |
| H | -2.41043800 | 1.18842800  | 4.74301000  |
| H | -0.34405300 | -2.56239500 | 4.53528700  |
| H | -1.98652100 | -1.07894500 | 5.65007600  |
| C | -2.31099100 | 1.59540400  | -0.74854200 |
| C | -3.01487900 | 1.04660400  | -1.82842800 |
| C | -2.71490600 | 2.83975500  | -0.25305800 |
| C | -4.09850900 | 1.71398400  | -2.37991300 |
| H | -2.70036800 | 0.09425700  | -2.23963800 |
| C | -3.79312900 | 3.51339200  | -0.81374100 |

|   |             |             |             |
|---|-------------|-------------|-------------|
| H | -2.16785200 | 3.27439200  | 0.57676600  |
| C | -4.49276700 | 2.95049800  | -1.87518300 |
| H | -4.63217600 | 1.27282600  | -3.21356800 |
| H | -4.09013900 | 4.47778800  | -0.41862600 |
| H | -5.33674400 | 3.47208100  | -2.31061000 |
| C | -2.00370300 | -1.43903400 | -0.18774100 |
| C | -3.00718700 | -1.17692000 | 0.76064500  |
| C | -2.11020200 | -2.61307100 | -0.95028100 |
| C | -4.07373400 | -2.04665300 | 0.93820300  |
| H | -2.92999600 | -0.28304800 | 1.37000000  |
| C | -3.18644400 | -3.47324800 | -0.77748600 |
| H | -1.37336500 | -2.85160700 | -1.70312400 |
| C | -4.17037000 | -3.19859700 | 0.16625200  |
| H | -4.82908800 | -1.82352800 | 1.68235200  |
| H | -3.25453000 | -4.36548000 | -1.38882500 |
| H | -5.00425200 | -3.87779500 | 0.29822800  |
| C | 0.90317100  | -2.04553300 | -1.25166400 |
| C | 1.42424200  | -3.26353700 | -0.81945300 |
| C | 0.73117900  | -1.82163500 | -2.62068200 |
| C | 1.75830500  | -4.24964000 | -1.74117500 |
| H | 1.55925100  | -3.43339300 | 0.24284000  |
| C | 1.06770300  | -2.80544300 | -3.54155400 |
| H | 0.33139200  | -0.86790200 | -2.95168600 |
| C | 1.57908200  | -4.02410700 | -3.10198300 |
| H | 2.15589100  | -5.19683800 | -1.39620300 |
| H | 0.93340400  | -2.62268500 | -4.60123000 |
| H | 1.83838600  | -4.79408900 | -3.81876500 |

SCF Done: E(RM062X) = -1618.13624634 A.U.

|                                          |                             |
|------------------------------------------|-----------------------------|
| Zero-point correction=                   | 0.552247 (Hartree/Particle) |
| Thermal correction to Energy=            | 0.673725                    |
| Thermal correction to Enthalpy=          | 0.675540                    |
| Thermal correction to Gibbs Free Energy= | 0.358862                    |

SCF Done: E(RB3LYP) = -1619.00537982 A.U.

### P2-Ph

|   |             |             |            |
|---|-------------|-------------|------------|
| C | 0.00000000  | 1.40494000  | 0.00000000 |
| C | -1.21671400 | 0.70247000  | 0.00000000 |
| C | -1.21671400 | -0.70247000 | 0.00000000 |
| C | 0.00000000  | -1.40494000 | 0.00000000 |
| C | 1.21671400  | -0.70247000 | 0.00000000 |

|   |             |             |             |
|---|-------------|-------------|-------------|
| C | 1.21671400  | 0.70247000  | 0.00000000  |
| C | 0.00000000  | 2.89993700  | 0.00000000  |
| C | 0.57941800  | 3.60858900  | 1.05281700  |
| C | -0.57941800 | 3.60858900  | -1.05281700 |
| C | 0.57619800  | 4.99778100  | 1.05562600  |
| H | 1.04124600  | 3.06271800  | 1.86825800  |
| C | -0.57619800 | 4.99778100  | -1.05562600 |
| H | -1.04124600 | 3.06271800  | -1.86825800 |
| C | 0.00000000  | 5.69661000  | 0.00000000  |
| H | 1.02810100  | 5.53471200  | 1.88119300  |
| H | -1.02810100 | 5.53471200  | -1.88119300 |
| H | 0.00000000  | 6.78007900  | 0.00000000  |
| C | -2.51141900 | 1.44996900  | 0.00000000  |
| C | -3.41483900 | 1.30250400  | -1.05281700 |
| C | -2.83542100 | 2.30608500  | 1.05281700  |
| C | -4.61630400 | 1.99988800  | -1.05562600 |
| H | -3.17301500 | 0.62961400  | -1.86825800 |
| C | -4.04010600 | 2.99789300  | 1.05562600  |
| H | -2.13176900 | 2.43310400  | 1.86825800  |
| C | -4.93340900 | 2.84830500  | 0.00000000  |
| H | -5.30725200 | 1.87699400  | -1.88119300 |
| H | -4.27915100 | 3.65771800  | 1.88119300  |
| H | -5.87172100 | 3.39004000  | 0.00000000  |
| C | -2.51141900 | -1.44996900 | 0.00000000  |
| C | -2.83542100 | -2.30608500 | -1.05281700 |
| C | -3.41483900 | -1.30250400 | 1.05281700  |
| C | -4.04010600 | -2.99789300 | -1.05562600 |
| H | -2.13176900 | -2.43310400 | -1.86825800 |
| C | -4.61630400 | -1.99988800 | 1.05562600  |
| H | -3.17301500 | -0.62961400 | 1.86825800  |
| C | -4.93340900 | -2.84830500 | 0.00000000  |
| H | -4.27915100 | -3.65771800 | -1.88119300 |
| H | -5.30725200 | -1.87699400 | 1.88119300  |
| H | -5.87172100 | -3.39003900 | 0.00000000  |
| C | 0.00000000  | -2.89993700 | 0.00000000  |
| C | 0.57941800  | -3.60858900 | -1.05281700 |
| C | -0.57941800 | -3.60858900 | 1.05281700  |
| C | 0.57619800  | -4.99778100 | -1.05562600 |
| H | 1.04124600  | -3.06271800 | -1.86825800 |
| C | -0.57619800 | -4.99778100 | 1.05562600  |
| H | -1.04124600 | -3.06271800 | 1.86825800  |
| C | 0.00000000  | -5.69661000 | 0.00000000  |
| H | 1.02810100  | -5.53471200 | -1.88119300 |
| H | -1.02810100 | -5.53471200 | 1.88119300  |

|   |            |             |             |
|---|------------|-------------|-------------|
| H | 0.00000000 | -6.78007900 | 0.00000000  |
| C | 2.51141900 | -1.44996900 | 0.00000000  |
| C | 3.41483900 | -1.30250400 | -1.05281700 |
| C | 2.83542100 | -2.30608500 | 1.05281700  |
| C | 4.61630400 | -1.99988800 | -1.05562600 |
| H | 3.17301500 | -0.62961400 | -1.86825800 |
| C | 4.04010600 | -2.99789300 | 1.05562600  |
| H | 2.13176900 | -2.43310400 | 1.86825800  |
| C | 4.93340900 | -2.84830500 | 0.00000000  |
| H | 5.30725200 | -1.87699400 | -1.88119300 |
| H | 4.27915100 | -3.65771800 | 1.88119300  |
| H | 5.87172100 | -3.39004000 | 0.00000000  |
| C | 2.51141900 | 1.44996800  | 0.00000000  |
| C | 3.41483900 | 1.30250400  | 1.05281700  |
| C | 2.83542100 | 2.30608500  | -1.05281700 |
| C | 4.61630400 | 1.99988800  | 1.05562600  |
| H | 3.17301500 | 0.62961400  | 1.86825800  |
| C | 4.04010600 | 2.99789300  | -1.05562600 |
| H | 2.13176900 | 2.43310400  | -1.86825800 |
| C | 4.93340900 | 2.84830500  | 0.00000000  |
| H | 5.30725200 | 1.87699400  | 1.88119300  |
| H | 4.27915100 | 3.65771800  | -1.88119300 |
| H | 5.87172100 | 3.39003900  | 0.00000000  |

SCF Done: E(RM062X) = -1618.27449305 A.U.

|                                          |                             |
|------------------------------------------|-----------------------------|
| Zero-point correction=                   | 0.556398 (Hartree/Particle) |
| Thermal correction to Energy=            | 0.678034                    |
| Thermal correction to Enthalpy=          | 0.679849                    |
| Thermal correction to Gibbs Free Energy= | 0.368405                    |

SCF Done: E(RB3LYP) = -1619.13457663 A.U.

#### TS1-Ph-con

|   |             |             |             |
|---|-------------|-------------|-------------|
| C | 3.79168100  | -2.33350100 | 0.98182000  |
| C | 2.95687000  | -2.56364800 | 2.08992700  |
| C | 1.58849700  | -2.58646800 | 1.94248000  |
| C | 1.00956600  | -2.33867600 | 0.67378300  |
| C | 1.86070600  | -2.11774700 | -0.43503800 |
| C | 3.24373200  | -2.13439700 | -0.27408300 |
| C | -0.35502600 | -2.13788800 | 0.46171900  |
| C | -1.05372800 | -1.17658700 | -0.02282500 |
| H | 4.86746800  | -2.33006600 | 1.11217700  |

|   |             |             |             |
|---|-------------|-------------|-------------|
| H | 0.93742700  | -2.76005300 | 2.79053200  |
| H | 1.41948800  | -1.98266000 | -1.41396100 |
| H | 3.88844400  | -1.96064000 | -1.12780700 |
| C | 4.57760300  | 2.08690800  | -1.42371100 |
| C | 3.52436900  | 2.09142400  | -2.33724000 |
| C | 2.28577700  | 1.58605400  | -1.98244500 |
| C | 2.08318000  | 1.04118400  | -0.69668600 |
| C | 3.16172300  | 1.02396700  | 0.21542900  |
| C | 4.38557400  | 1.55950900  | -0.14788800 |
| C | 0.83360700  | 0.53267600  | -0.31336500 |
| C | -0.33632900 | 0.33527000  | 0.13036700  |
| H | 5.54176900  | 2.49204800  | -1.70520000 |
| H | 3.67032500  | 2.50137000  | -3.32966500 |
| H | 1.46143500  | 1.59425500  | -2.68534600 |
| H | 3.01016700  | 0.58772300  | 1.19562700  |
| H | 5.20243600  | 1.55470300  | 0.56408700  |
| H | 3.39630500  | -2.72321500 | 3.06769500  |
| C | -1.22134500 | 1.29081600  | 0.85285700  |
| C | -2.13364900 | 0.85405000  | 1.81316900  |
| C | -1.11779800 | 2.65765000  | 0.58079500  |
| C | -2.92373400 | 1.77244500  | 2.49455600  |
| H | -2.22094700 | -0.20453500 | 2.02655100  |
| C | -1.91482100 | 3.57013000  | 1.25717700  |
| H | -0.40855700 | 2.99528200  | -0.16698800 |
| C | -2.82084700 | 3.13048500  | 2.21779900  |
| H | -3.62615100 | 1.42144300  | 3.24118100  |
| H | -1.82839200 | 4.62694700  | 1.03404100  |
| H | -3.44381800 | 3.84274200  | 2.74517400  |
| C | -2.36978100 | -1.13202200 | -0.68915700 |
| C | -2.72670400 | -0.08829600 | -1.54499700 |
| C | -3.27492000 | -2.17980700 | -0.48454500 |
| C | -3.95928100 | -0.09432700 | -2.18619400 |
| H | -2.03545700 | 0.72836800  | -1.71449600 |
| C | -4.50691600 | -2.17835300 | -1.12154800 |
| H | -2.99299300 | -2.98747200 | 0.18041700  |
| C | -4.85489100 | -1.13555700 | -1.97577200 |
| H | -4.22023000 | 0.72138800  | -2.84974600 |
| H | -5.19953400 | -2.99404000 | -0.95056900 |
| H | -5.81787800 | -1.13535900 | -2.47200400 |

SCF Done: E(RM062X) = -1078.65021494 A.U.

Zero-point correction= 0.364412 (Hartree/Particle)  
 Thermal correction to Energy= 0.445788



Thermal correction to Enthalpy= 0.447603  
Thermal correction to Gibbs Free Energy= 0.217565

SCF Done: E(RB3LYP) = -1079.23690214 A.U.

**TS4-Ph-2**

|   |             |             |             |
|---|-------------|-------------|-------------|
| C | 2.30207500  | -4.73917100 | 1.41584600  |
| C | 1.71765600  | -3.92969500 | 2.38635100  |
| C | 2.42456000  | -4.26713300 | 0.11287100  |
| H | 2.66310300  | -5.72704600 | 1.67501800  |
| C | 1.25742500  | -2.66469400 | 2.05722300  |
| H | 1.61943500  | -4.28709400 | 3.40459900  |
| C | 1.96868000  | -3.00052300 | -0.22488200 |
| H | 2.88450000  | -4.88837800 | -0.64667900 |
| C | 1.36297800  | -2.17881200 | 0.73959500  |
| H | 0.79427600  | -2.03598100 | 2.80899400  |
| H | 2.08921600  | -2.63232600 | -1.23483700 |
| C | -0.26621800 | -0.22905300 | 0.76184600  |
| C | -0.47485500 | 1.24773100  | 0.62183500  |
| C | -1.68102900 | 1.74212800  | 0.45710700  |
| C | -3.02416900 | 2.02585100  | 0.31303100  |
| C | -3.60163100 | 2.23722200  | -0.97095800 |
| C | -3.87388100 | 2.14392900  | 1.44876600  |
| C | -4.94723200 | 2.52025000  | -1.09978100 |
| H | -2.96835500 | 2.18880100  | -1.84871700 |
| C | -5.21499200 | 2.43073600  | 1.29646300  |
| H | -3.44810600 | 1.99811900  | 2.43343900  |
| C | -5.76658800 | 2.61585500  | 0.02646900  |
| H | -5.36679600 | 2.67568500  | -2.08714700 |
| H | -5.84523400 | 2.50915100  | 2.17461100  |
| H | -6.82046600 | 2.83819000  | -0.08353700 |
| C | -1.44507100 | -1.04018900 | 1.19466900  |
| C | -1.85839800 | -2.13107500 | 0.42713700  |
| C | -2.15126300 | -0.72485200 | 2.35783800  |
| C | -2.95594200 | -2.88955900 | 0.81468800  |
| H | -1.31889500 | -2.37454600 | -0.48287200 |
| C | -3.24525500 | -1.48752800 | 2.74821300  |
| H | -1.83134400 | 0.12052900  | 2.95857700  |
| C | -3.65217600 | -2.57112600 | 1.97571500  |
| H | -3.26966000 | -3.72800600 | 0.20376100  |
| H | -3.78209900 | -1.23556200 | 3.65547400  |
| H | -4.50960700 | -3.16164600 | 2.27632700  |
| C | 0.69269300  | 2.17836400  | 0.69874100  |

|   |             |             |             |
|---|-------------|-------------|-------------|
| C | 0.74590300  | 3.30250800  | -0.12888600 |
| C | 1.71863100  | 1.97032700  | 1.62213000  |
| C | 1.79536200  | 4.20634400  | -0.02778600 |
| H | -0.04511600 | 3.45886400  | -0.85474500 |
| C | 2.77027300  | 2.87350800  | 1.72055600  |
| H | 1.69487600  | 1.09331700  | 2.25906400  |
| C | 2.81092700  | 3.99423100  | 0.89922800  |
| H | 1.82424500  | 5.07265700  | -0.67861500 |
| H | 3.56466500  | 2.69623200  | 2.43592800  |
| H | 3.63793600  | 4.69079600  | 0.97126100  |
| C | 0.87744800  | -0.84392900 | 0.46419300  |
| C | 1.97261300  | -0.02253100 | -1.26148300 |
| C | 1.12978700  | -0.34225300 | -2.10235400 |
| C | -0.07493100 | -0.87296900 | -2.63762600 |
| C | -0.11452900 | -2.15599100 | -3.20589000 |
| C | -1.27076700 | -0.15325200 | -2.48745800 |
| C | -1.32876200 | -2.70962500 | -3.58515500 |
| H | 0.80720500  | -2.71045500 | -3.33293600 |
| C | -2.47993400 | -0.71707200 | -2.86259200 |
| H | -1.22714100 | 0.83057500  | -2.03915900 |
| C | -2.51303300 | -1.99799400 | -3.40761100 |
| H | -1.35357100 | -3.70423800 | -4.01397500 |
| H | -3.39999200 | -0.16537600 | -2.70745700 |
| H | -3.45920700 | -2.44160600 | -3.69305000 |
| C | 3.23811400  | 0.54325100  | -0.83629200 |
| C | 4.01334100  | -0.05094300 | 0.16463300  |
| C | 3.70404700  | 1.69790300  | -1.47108900 |
| C | 5.23779500  | 0.50023100  | 0.51370800  |
| H | 3.65397200  | -0.94200600 | 0.66340100  |
| C | 4.92787100  | 2.24664900  | -1.11188000 |
| H | 3.09151400  | 2.16127800  | -2.23473800 |
| C | 5.69853100  | 1.65043900  | -0.12053700 |
| H | 5.83443900  | 0.02915000  | 1.28586500  |
| H | 5.27583500  | 3.14679500  | -1.60495800 |
| H | 6.65405500  | 2.07918600  | 0.15754200  |

SCF Done: E(UM062X) = -1618.01803691 A.U.

<S\*\*2> = 1.0805

Zero-point correction= 0.547612 (Hartree/Particle)

Thermal correction to Energy= 0.672493

Thermal correction to Enthalpy= 0.674308

Thermal correction to Gibbs Free Energy= 0.348428

SCF Done: E(UB3LYP) = -1618.89322544 A.U.

<S\*\*2> = 1.0538

**TS7-Ph-2**

|   |             |             |             |
|---|-------------|-------------|-------------|
| C | -0.69400800 | 0.67031600  | -1.41965700 |
| C | 0.54287700  | 0.75428900  | -1.42901700 |
| C | 1.87928600  | 0.68194200  | -1.94830600 |
| C | 2.27107800  | -0.51420500 | -2.57087900 |
| C | 2.81656200  | 1.71543500  | -1.81070600 |
| C | 3.56998500  | -0.67806800 | -3.02684600 |
| H | 1.54508200  | -1.31250800 | -2.67102900 |
| C | 4.11801600  | 1.53725000  | -2.26330900 |
| H | 2.52709400  | 2.64778900  | -1.34318400 |
| C | 4.50247600  | 0.34343100  | -2.86648600 |
| H | 3.85848100  | -1.60960700 | -3.49905800 |
| H | 4.83576200  | 2.34040800  | -2.14463600 |
| H | 5.51920400  | 0.21285100  | -3.21696100 |
| C | -0.85794300 | 0.31650900  | 0.77894200  |
| C | -0.54862300 | -1.03139600 | 0.88296900  |
| C | 0.69558300  | 0.59545100  | 0.80115400  |
| C | 0.88673500  | -0.77378200 | 0.92286000  |
| C | 2.04972800  | -1.65669300 | 1.00236500  |
| C | 1.93556000  | -2.90125900 | 1.63794800  |
| C | 3.28938900  | -1.29401500 | 0.45653300  |
| C | 3.02584400  | -3.75683000 | 1.72134000  |
| H | 0.98659800  | -3.19021000 | 2.07487900  |
| C | 4.37423500  | -2.15558600 | 0.53688200  |
| H | 3.40046100  | -0.33904900 | -0.04443100 |
| C | 4.24820600  | -3.38996500 | 1.16788500  |
| H | 2.91973100  | -4.71273600 | 2.22057500  |
| H | 5.31984300  | -1.86072900 | 0.09693600  |
| H | 5.09699900  | -4.06072900 | 1.22807300  |
| C | 1.46497700  | 1.80058200  | 1.09110800  |
| C | 0.96953000  | 3.05749200  | 0.70674100  |
| C | 2.71415500  | 1.74090400  | 1.72131900  |
| C | 1.70635400  | 4.21030600  | 0.93198900  |
| H | 0.01074300  | 3.11398600  | 0.20367100  |
| C | 3.45486800  | 2.89684300  | 1.93396200  |
| H | 3.09635700  | 0.78450800  | 2.05645100  |
| C | 2.95876800  | 4.13444400  | 1.53777700  |
| H | 1.30871800  | 5.17030100  | 0.62426700  |
| H | 4.42070800  | 2.82962400  | 2.42074300  |
| H | 3.53814600  | 5.03419400  | 1.70648300  |
| C | -2.02530600 | 0.62937600  | -1.95312000 |
| C | -2.60265900 | -0.60668500 | -2.27800200 |

|   |             |             |             |
|---|-------------|-------------|-------------|
| C | -2.78237700 | 1.79680400  | -2.09465900 |
| C | -3.90937400 | -0.66526100 | -2.73834200 |
| H | -2.02393200 | -1.51349400 | -2.14297400 |
| C | -4.09065000 | 1.72893000  | -2.55576900 |
| H | -2.34144000 | 2.74938600  | -1.82537000 |
| C | -4.65958200 | 0.50126100  | -2.87606200 |
| H | -4.34716200 | -1.62543100 | -2.98461900 |
| H | -4.66987000 | 2.63920800  | -2.65527500 |
| H | -5.68180100 | 0.45117700  | -3.23126700 |
| C | -2.01064200 | 1.10589800  | 1.21866100  |
| C | -3.31982200 | 0.75695200  | 0.84736200  |
| C | -1.83220600 | 2.20421800  | 2.07105900  |
| C | -4.40357200 | 1.49232900  | 1.30186900  |
| H | -3.48488500 | -0.08968000 | 0.19182700  |
| C | -2.92407400 | 2.93687200  | 2.52392800  |
| H | -0.83756900 | 2.46696500  | 2.40614100  |
| C | -4.21243000 | 2.59036400  | 2.13717400  |
| H | -5.40324500 | 1.21039000  | 0.99246300  |
| H | -2.76224600 | 3.77742200  | 3.18853400  |
| H | -5.06178700 | 3.16524300  | 2.48654200  |
| C | -1.34077600 | -2.26181400 | 0.80083100  |
| C | -0.89438300 | -3.31182300 | -0.01147500 |
| C | -2.54920300 | -2.40597300 | 1.49042100  |
| C | -1.65008200 | -4.46918100 | -0.14724800 |
| H | 0.04760300  | -3.20654700 | -0.53980900 |
| C | -3.30093400 | -3.56584200 | 1.35468000  |
| H | -2.88973700 | -1.60449200 | 2.13557600  |
| C | -2.85721500 | -4.59794300 | 0.53307500  |
| H | -1.29707000 | -5.27141000 | -0.78443600 |
| H | -4.23468900 | -3.66669100 | 1.89518100  |
| H | -3.44619500 | -5.50138800 | 0.42901300  |

SCF Done: E(RM062X) = -1618.08018439 A.U.

|                                          |                             |
|------------------------------------------|-----------------------------|
| Zero-point correction=                   | 0.550872 (Hartree/Particle) |
| Thermal correction to Energy=            | 0.673976                    |
| Thermal correction to Enthalpy=          | 0.675791                    |
| Thermal correction to Gibbs Free Energy= | 0.356401                    |

SCF Done: E(RB3LYP) = -1618.94633990 A.U.

### compound 3

|   |            |             |             |
|---|------------|-------------|-------------|
| C | 3.20800700 | -0.34948800 | -0.00001800 |
|---|------------|-------------|-------------|

|   |             |             |             |
|---|-------------|-------------|-------------|
| C | 4.37268200  | -0.64385900 | 0.00000200  |
| H | 5.40278200  | -0.90857000 | 0.00006300  |
| C | 1.82235800  | 0.01734600  | -0.00001000 |
| C | 0.84047200  | -0.94697000 | -0.00000800 |
| C | 1.46017700  | 1.39460200  | -0.00000600 |
| C | -0.52913500 | -0.58951200 | -0.00000200 |
| H | 1.11647500  | -1.99552800 | -0.00001200 |
| C | 0.14539100  | 1.76159800  | 0.00000000  |
| H | 2.24665100  | 2.13879700  | -0.00000700 |
| C | -1.55713800 | -1.56796700 | 0.00000000  |
| C | -0.88575800 | 0.78580100  | 0.00000300  |
| H | -0.12899900 | 2.81097600  | 0.00000400  |
| C | -2.87391200 | -1.19615400 | 0.00000600  |
| H | -1.27887200 | -2.61634800 | -0.00000300 |
| C | -2.25842100 | 1.13976500  | 0.00000900  |
| C | -3.22884300 | 0.17391800  | 0.00001100  |
| H | -3.65214500 | -1.94978600 | 0.00000800  |
| H | -2.52586800 | 2.19105500  | 0.00001200  |
| H | -4.27529700 | 0.45492100  | 0.00001600  |

SCF Done: E(RM062X) = -461.950327155 A.U.

|                                          |                             |
|------------------------------------------|-----------------------------|
| Zero-point correction=                   | 0.148701 (Hartree/Particle) |
| Thermal correction to Energy=            | 0.181941                    |
| Thermal correction to Enthalpy=          | 0.183756                    |
| Thermal correction to Gibbs Free Energy= | 0.065088                    |

SCF Done: E(RB3LYP) = -462.192150471 A.U.

### Transition state for the dimerization of compound 3

|   |             |             |             |
|---|-------------|-------------|-------------|
| C | 1.47804100  | -0.36038800 | -0.87834600 |
| C | 0.24724800  | -0.18098100 | -0.72617200 |
| C | -0.29505800 | 0.15784500  | 0.96625000  |
| C | -1.52815900 | 0.34578100  | 1.09898200  |
| H | -0.63355400 | -0.15481900 | -1.34518800 |
| H | 0.58124500  | 0.14613600  | 1.59113800  |
| C | 2.84478600  | -0.48423800 | -0.58175100 |
| C | 3.66189200  | 0.63615100  | -0.48998500 |
| C | 3.41996300  | -1.78291900 | -0.38465300 |
| C | 5.03905000  | 0.51294300  | -0.20592600 |
| H | 3.23452900  | 1.62089900  | -0.64287700 |
| C | 4.74706600  | -1.91754000 | -0.11226400 |
| H | 2.77481100  | -2.64949400 | -0.45957800 |

|   |             |             |             |
|---|-------------|-------------|-------------|
| C | 5.88679600  | 1.64795700  | -0.10575100 |
| C | 5.59911400  | -0.78116700 | -0.01663900 |
| H | 5.17676000  | -2.90254600 | 0.03595000  |
| C | 7.22072900  | 1.50204300  | 0.16560100  |
| H | 5.45656400  | 2.63322700  | -0.24951600 |
| C | 6.98073700  | -0.89945800 | 0.26010100  |
| C | 7.77561600  | 0.21431800  | 0.34979300  |
| H | 7.85872000  | 2.37468000  | 0.23809500  |
| H | 7.40194100  | -1.88916400 | 0.40111800  |
| H | 8.83293200  | 0.11215700  | 0.56218800  |
| C | -2.87002500 | 0.47282100  | 0.70110900  |
| C | -3.72726900 | -0.62056900 | 0.70452000  |
| C | -3.37039800 | 1.74750200  | 0.27583300  |
| C | -5.06995700 | -0.49577300 | 0.28801900  |
| H | -3.35843300 | -1.58570300 | 1.03297500  |
| C | -4.66210300 | 1.88220800  | -0.13398200 |
| H | -2.69636600 | 2.59510500  | 0.28321800  |
| C | -5.95771000 | -1.60435900 | 0.28250700  |
| C | -5.55177300 | 0.77162900  | -0.14339200 |
| H | -5.03202900 | 2.84716000  | -0.46363700 |
| C | -7.25439500 | -1.45906400 | -0.13150100 |
| H | -5.58837800 | -2.56877500 | 0.61383700  |
| C | -6.89603200 | 0.88939400  | -0.56664700 |
| C | -7.73016200 | -0.19876800 | -0.56251500 |
| H | -7.92290300 | -2.31158000 | -0.13104500 |
| H | -7.25600200 | 1.85813500  | -0.89610000 |
| H | -8.75781700 | -0.09762000 | -0.88971300 |

SCF Done: E(UM062X) = -923.854302195 A.U.

<S\*\*2> = 0.3065

Zero-point correction= 0.297666 (Hartree/Particle)

Thermal correction to Energy= 0.366389

Thermal correction to Enthalpy= 0.368204

Thermal correction to Gibbs Free Energy= 0.162607

SCF Done: E(UB3LYP) = -924.352104927 A.U.

<S\*\*2> = 0.1903

#### compound 4

|   |             |             |             |
|---|-------------|-------------|-------------|
| C | 2.34696100  | -0.95944600 | -0.00010000 |
| C | 3.17510200  | -1.82990900 | -0.00004500 |
| H | 3.91295600  | -2.59579200 | 0.00036300  |
| C | 1.35781700  | 0.07733000  | -0.00004600 |
| C | -0.03414400 | -0.25881100 | -0.00001700 |

|   |             |             |             |
|---|-------------|-------------|-------------|
| C | 1.74949100  | 1.39828600  | -0.00002700 |
| C | -0.48997300 | -1.60069800 | -0.00003500 |
| C | -0.98862600 | 0.79279100  | 0.00003000  |
| C | 0.79295900  | 2.43401900  | 0.00002000  |
| H | 2.80656900  | 1.63360600  | -0.00004900 |
| C | -1.83042800 | -1.88069300 | -0.00000700 |
| H | 0.24178800  | -2.39955000 | -0.00007000 |
| C | -2.37011000 | 0.46855700  | 0.00005700  |
| C | -0.54372900 | 2.13924900  | 0.00004800  |
| H | 1.12678900  | 3.46441900  | 0.00003400  |
| C | -2.78273900 | -0.83563700 | 0.00003900  |
| H | -2.16757900 | -2.91034300 | -0.00002100 |
| H | -3.09224300 | 1.27777400  | 0.00009300  |
| H | -1.28377500 | 2.93213600  | 0.00008400  |
| H | -3.83998000 | -1.07248700 | 0.00006100  |

SCF Done: E(RM062X) = -461.950802245 A.U.

|                                          |                             |
|------------------------------------------|-----------------------------|
| Zero-point correction=                   | 0.148682 (Hartree/Particle) |
| Thermal correction to Energy=            | 0.181937                    |
| Thermal correction to Enthalpy=          | 0.183752                    |
| Thermal correction to Gibbs Free Energy= | 0.065105                    |

SCF Done: E(RB3LYP) = -462.192677805 A.U.

#### Transition state for the dimerization of compound 4

|   |             |             |             |
|---|-------------|-------------|-------------|
| C | -1.53568300 | -0.54974300 | -0.92876500 |
| C | -0.32613100 | -0.23103400 | -0.85466400 |
| C | 0.32632100  | -0.08157500 | 0.83908900  |
| C | 1.50649400  | 0.33092300  | 0.92105100  |
| H | 0.48757400  | -0.00740400 | -1.52258600 |
| H | -0.46390300 | -0.38958000 | 1.50185500  |
| C | -2.82456400 | -0.90696200 | -0.50764600 |
| C | -3.83127900 | 0.10230200  | -0.28400000 |
| C | -3.14466700 | -2.24723400 | -0.30346300 |
| C | -3.57021900 | 1.47874600  | -0.47496800 |
| C | -5.12185200 | -0.30203700 | 0.14712000  |
| C | -4.42672300 | -2.62599700 | 0.12343100  |
| H | -2.38414800 | -2.99779000 | -0.48013100 |
| C | -4.54706800 | 2.41364800  | -0.24684800 |
| H | -2.58380000 | 1.78147400  | -0.80621200 |
| C | -6.11100100 | 0.68876800  | 0.37436300  |
| C | -5.39664600 | -1.68030700 | 0.34462400  |

|   |             |             |             |
|---|-------------|-------------|-------------|
| H | -4.64469700 | -3.67579300 | 0.27829900  |
| C | -5.83204200 | 2.01545900  | 0.18280500  |
| H | -4.33462800 | 3.46520000  | -0.39781700 |
| H | -7.09480500 | 0.37271800  | 0.70385700  |
| H | -6.38796400 | -1.97252400 | 0.67252900  |
| H | -6.59559100 | 2.76390000  | 0.35819500  |
| C | 2.76486200  | 0.80516900  | 0.52455600  |
| C | 3.85031600  | -0.11169600 | 0.27239500  |
| C | 2.97867000  | 2.17361700  | 0.37470100  |
| C | 3.69904600  | -1.51105100 | 0.40905000  |
| C | 5.10698600  | 0.41023000  | -0.13145500 |
| C | 4.22949900  | 2.66931400  | -0.02357300 |
| H | 2.15965300  | 2.85384700  | 0.57261000  |
| C | 4.74861900  | -2.35596000 | 0.15392300  |
| H | 2.73852400  | -1.90295900 | 0.72268100  |
| C | 6.17269500  | -0.48936600 | -0.38893000 |
| C | 5.27287400  | 1.81267300  | -0.27241300 |
| H | 4.36491700  | 3.73841000  | -0.13501900 |
| C | 5.99963400  | -1.84039600 | -0.25057900 |
| H | 4.61976300  | -3.42612000 | 0.26352800  |
| H | 7.12977100  | -0.08427500 | -0.69941900 |
| H | 6.23967700  | 2.19429300  | -0.58119600 |
| H | 6.82080500  | -2.51835300 | -0.44999700 |

SCF Done: E(UM062X) = -923.857037520 A.U.

<S\*\*2> = 0.3047

|                                          |                             |
|------------------------------------------|-----------------------------|
| Zero-point correction=                   | 0.297295 (Hartree/Particle) |
| Thermal correction to Energy=            | 0.366115                    |
| Thermal correction to Enthalpy=          | 0.367930                    |
| Thermal correction to Gibbs Free Energy= | 0.159777                    |

SCF Done: E(UB3LYP) = -924.355087127 A.U.

<S\*\*2> = 0.1910

#### compound 5

|   |             |             |             |
|---|-------------|-------------|-------------|
| C | 0.00004800  | 2.43947900  | -0.00003800 |
| C | 0.00035600  | 3.64176900  | 0.00004900  |
| H | 0.00054800  | 4.70541100  | 0.00007900  |
| C | 0.00000600  | 1.00861300  | -0.00001900 |
| C | -1.22609100 | 0.31209100  | -0.00001000 |
| C | 1.22606500  | 0.31202500  | -0.00001000 |
| C | -2.48640800 | 0.98404100  | -0.00001700 |
| C | -1.21645200 | -1.11999500 | 0.00000700  |
| C | 1.21635300  | -1.12005900 | 0.00000600  |



|   |             |             |             |
|---|-------------|-------------|-------------|
| C | 2.48641600  | 0.98391200  | -0.00001800 |
| C | -3.65193400 | 0.27977200  | -0.00000900 |
| H | -2.49444700 | 2.06688100  | -0.00002900 |
| C | -2.46265200 | -1.82049400 | 0.00001500  |
| C | -0.00006700 | -1.80003200 | 0.00001400  |
| C | 2.46251800  | -1.82062100 | 0.00001400  |
| H | 2.49450900  | 2.06675100  | -0.00003100 |
| C | 3.65190700  | 0.27958400  | -0.00001100 |
| C | -3.64312300 | -1.14516600 | 0.00000700  |
| H | -4.59957800 | 0.80485200  | -0.00001500 |
| H | -2.44243900 | -2.90473000 | 0.00002700  |
| H | -0.00009600 | -2.88570900 | 0.00002600  |
| C | 3.64302300  | -1.14535300 | 0.00000600  |
| H | 2.44225000  | -2.90485700 | 0.00002600  |
| H | 4.59957700  | 0.80461700  | -0.00001700 |
| H | -4.58214300 | -1.68519400 | 0.00001300  |
| H | 4.58201600  | -1.68542900 | 0.00001200  |

SCF Done: E(RM062X) = -615.560399781 A.U.

|                                          |                             |
|------------------------------------------|-----------------------------|
| Zero-point correction=                   | 0.193173 (Hartree/Particle) |
| Thermal correction to Energy=            | 0.236909                    |
| Thermal correction to Enthalpy=          | 0.238724                    |
| Thermal correction to Gibbs Free Energy= | 0.097811                    |

SCF Done: E(RB3LYP) = -615.881482474 A.U.

#### Transition state for the dimerization of compound 5

|   |             |             |             |
|---|-------------|-------------|-------------|
| C | -1.62006200 | -0.25839100 | -0.87109600 |
| C | -0.37772200 | -0.38399800 | -0.85652200 |
| C | 0.37772200  | -0.38400000 | 0.85652200  |
| C | 1.62006200  | -0.25839200 | 0.87109600  |
| H | 0.44897100  | -0.49994800 | -1.53376200 |
| H | -0.44897100 | -0.49995300 | 1.53376100  |
| C | -2.94868100 | -0.10916500 | -0.47926500 |
| C | -3.51703500 | 1.19486100  | -0.36062400 |
| C | -3.74578100 | -1.26166700 | -0.20579800 |
| C | -2.76205800 | 2.37125600  | -0.61880900 |
| C | -4.88451600 | 1.33032900  | 0.03028200  |
| C | -5.10896500 | -1.09389000 | 0.18779500  |
| C | -3.22360700 | -2.58013700 | -0.30692400 |
| C | -3.32791600 | 3.60814300  | -0.49635300 |
| H | -1.72637000 | 2.26744800  | -0.91992200 |

|   |             |             |             |
|---|-------------|-------------|-------------|
| C | -5.44076400 | 2.64019900  | 0.14773500  |
| C | -5.64875600 | 0.19061700  | 0.29438500  |
| C | -5.89234600 | -2.25403300 | 0.47001000  |
| H | -2.19235300 | -2.70728800 | -0.61381000 |
| C | -4.00275800 | -3.66663400 | -0.02887300 |
| C | -4.68742500 | 3.74626400  | -0.10680400 |
| H | -2.73903300 | 4.49436000  | -0.70016700 |
| H | -6.47928300 | 2.73265300  | 0.44613500  |
| H | -6.68597600 | 0.30599900  | 0.59252400  |
| C | -5.35736500 | -3.50260600 | 0.36754400  |
| H | -6.92518200 | -2.11584800 | 0.77036500  |
| H | -3.58824400 | -4.66408800 | -0.11229300 |
| H | -5.12018300 | 4.73515300  | -0.01409900 |
| H | -5.96062600 | -4.37534700 | 0.58687300  |
| C | 2.94868100  | -0.10916500 | 0.47926500  |
| C | 3.51703400  | 1.19486100  | 0.36062400  |
| C | 3.74578200  | -1.26166700 | 0.20579800  |
| C | 2.76205600  | 2.37125600  | 0.61880700  |
| C | 4.88451600  | 1.33033000  | -0.03028100 |
| C | 5.10896600  | -1.09388900 | -0.18779400 |
| C | 3.22360700  | -2.58013700 | 0.30692200  |
| C | 3.32791400  | 3.60814300  | 0.49635100  |
| H | 1.72636800  | 2.26744700  | 0.91991800  |
| C | 5.44076300  | 2.64019900  | -0.14773300 |
| C | 5.64875600  | 0.19061800  | -0.29438200 |
| C | 5.89234700  | -2.25403200 | -0.47000900 |
| H | 2.19235300  | -2.70728900 | 0.61380700  |
| C | 4.00275900  | -3.66663400 | 0.02887100  |
| C | 4.68742400  | 3.74626500  | 0.10680400  |
| H | 2.73903100  | 4.49436000  | 0.70016400  |
| H | 6.47928300  | 2.73265400  | -0.44613200 |
| H | 6.68597700  | 0.30600000  | -0.59252000 |
| C | 5.35736600  | -3.50260500 | -0.36754500 |
| H | 6.92518300  | -2.11584600 | -0.77036300 |
| H | 3.58824400  | -4.66408800 | 0.11229000  |
| H | 5.12018100  | 4.73515400  | 0.01410000  |
| H | 5.96062800  | -4.37534600 | -0.58687300 |

SCF Done: E(UM062X) = -1231.08226481 A.U.

<S\*\*2> = 0.2876

|                                          |                             |
|------------------------------------------|-----------------------------|
| Zero-point correction=                   | 0.385206 (Hartree/Particle) |
| Thermal correction to Energy=            | 0.475324                    |
| Thermal correction to Enthalpy=          | 0.477139                    |
| Thermal correction to Gibbs Free Energy= | 0.228149                    |

SCF Done: E(UB3LYP) = -1231.73871692 A.U.  
<S\*\*2> = 0.1606

**compound 6**

|   |             |             |             |
|---|-------------|-------------|-------------|
| C | -0.00000300 | 2.05430500  | -0.00000300 |
| C | 1.20463500  | 1.36476700  | 0.00002300  |
| C | 1.21026800  | -0.03444700 | 0.00002500  |
| C | 0.00000200  | -0.72981800 | 0.00000200  |
| C | -1.21026600 | -0.03445200 | -0.00002400 |
| C | -1.20463700 | 1.36476300  | -0.00002600 |
| H | -0.00000400 | 3.13724400  | -0.00000400 |
| H | 2.14738000  | 1.89715800  | 0.00004100  |
| H | 0.00000500  | -1.81217300 | 0.00000300  |
| H | -2.14738500 | 1.89715000  | -0.00004600 |
| C | 2.45127800  | -0.75276300 | 0.00005000  |
| C | 3.49154000  | -1.35221200 | 0.00007000  |
| H | 4.41198000  | -1.88518800 | 0.00007700  |
| C | -2.45127400 | -0.75277000 | -0.00004700 |
| C | -3.49154200 | -1.35220900 | -0.00006700 |
| H | -4.41198700 | -1.88517600 | -0.00008700 |

SCF Done: E(RM062X) = -384.471634298 A.U.

|                                          |                             |
|------------------------------------------|-----------------------------|
| Zero-point correction=                   | 0.113172 (Hartree/Particle) |
| Thermal correction to Energy=            | 0.142082                    |
| Thermal correction to Enthalpy=          | 0.143897                    |
| Thermal correction to Gibbs Free Energy= | 0.032794                    |

SCF Done: E(RB3LYP) = -384.667705127 A.U.

**Transition state for the dimerization of compound 6**

|   |             |             |             |
|---|-------------|-------------|-------------|
| C | -4.35612000 | 1.59774200  | -0.23797900 |
| C | -3.09224000 | 1.96977100  | -0.68302400 |
| C | -4.64719400 | 0.24459000  | -0.01674900 |
| H | -5.12359500 | 2.34049500  | -0.06183100 |
| C | -2.11266900 | 1.01699900  | -0.90585300 |
| H | -2.87113000 | 3.01638800  | -0.85418900 |
| C | -3.67261700 | -0.72250900 | -0.24764800 |
| C | -2.38937200 | -0.34936100 | -0.68752100 |
| H | -1.12555300 | 1.30349900  | -1.24716200 |
| C | -1.39822300 | -1.31794800 | -0.91748800 |
| C | -0.39315400 | -2.05557800 | -0.78707900 |

|   |             |             |             |
|---|-------------|-------------|-------------|
| C | 0.39314500  | -2.05557600 | 0.78704200  |
| C | 1.39821300  | -1.31794500 | 0.91745200  |
| C | 2.38936400  | -0.34935900 | 0.68749600  |
| C | 2.11265500  | 1.01700200  | 0.90581400  |
| C | 3.67261900  | -0.72250800 | 0.24765200  |
| C | 3.09222900  | 1.96977400  | 0.68299900  |
| H | 1.12553100  | 1.30350300  | 1.24709900  |
| C | 4.64720000  | 0.24459100  | 0.01676800  |
| C | 4.35611900  | 1.59774300  | 0.23798500  |
| H | 2.87111500  | 3.01639200  | 0.85415300  |
| H | 5.12359900  | 2.34049600  | 0.06185000  |
| H | 0.15298800  | -2.74657500 | -1.40924300 |
| H | -0.15299800 | -2.74657200 | 1.40920600  |
| H | 3.90155900  | -1.76814700 | 0.08648900  |
| H | -3.90155300 | -1.76814700 | -0.08647400 |
| C | -5.94909900 | -0.14579300 | 0.44190300  |
| C | -7.03965000 | -0.46918600 | 0.82624600  |
| H | -8.00520000 | -0.75807500 | 1.16599600  |
| C | 5.94911600  | -0.14579300 | -0.44185100 |
| C | 7.03967700  | -0.46918700 | -0.82616700 |
| H | 8.00523500  | -0.75807800 | -1.16589000 |

SCF Done: E(UM062X) = -768.896094846 A.U.

<S\*\*2> = 0.3292

|                                          |                             |
|------------------------------------------|-----------------------------|
| Zero-point correction=                   | 0.225318 (Hartree/Particle) |
| Thermal correction to Energy=            | 0.285803                    |
| Thermal correction to Enthalpy=          | 0.287618                    |
| Thermal correction to Gibbs Free Energy= | 0.096312                    |

SCF Done: E(UB3LYP) = -769.302310197 A.U.

<S\*\*2> = 0.2244

### compound 7

|   |             |             |             |
|---|-------------|-------------|-------------|
| C | 0.69221100  | 1.20810200  | 0.00000100  |
| C | -0.69218200 | 1.20811900  | 0.00000100  |
| C | -1.39863700 | 0.00003400  | 0.00000000  |
| C | -0.69221100 | -1.20806800 | -0.00000100 |
| C | 0.69218200  | -1.20808400 | -0.00000100 |
| C | 1.39863700  | 0.00000100  | 0.00000000  |
| H | 1.24090300  | 2.14145900  | 0.00000200  |
| H | -1.24085200 | 2.14148900  | 0.00000200  |
| H | -1.24090300 | -2.14142400 | -0.00000200 |
| H | 1.24085200  | -2.14145400 | -0.00000200 |
| C | -2.83113600 | 0.00005200  | 0.00000100  |

|   |             |             |             |
|---|-------------|-------------|-------------|
| C | -4.03206900 | 0.00002600  | -0.00000300 |
| H | -5.09562600 | -0.00067600 | -0.00004100 |
| C | 2.83113600  | -0.00001600 | -0.00000100 |
| C | 4.03206900  | -0.00003600 | 0.00000300  |
| H | 5.09562600  | -0.00018400 | 0.00004900  |

SCF Done: E(RM062X) = -384.472298283 A.U.

|                                          |                             |
|------------------------------------------|-----------------------------|
| Zero-point correction=                   | 0.113259 (Hartree/Particle) |
| Thermal correction to Energy=            | 0.142163                    |
| Thermal correction to Enthalpy=          | 0.143978                    |
| Thermal correction to Gibbs Free Energy= | 0.032872                    |

SCF Done: E(RB3LYP) = -384.668523909 A.U.

**Transition state for the dimerization of compound 7**

|   |             |             |             |
|---|-------------|-------------|-------------|
| C | -1.46121300 | 4.18436500  | 0.93611500  |
| C | -0.58825500 | 3.16285300  | 1.33988900  |
| C | -1.73040200 | 4.35301600  | -0.43061900 |
| C | -0.00421800 | 2.32877600  | 0.40879500  |
| H | -0.38130400 | 3.03386900  | 2.39504400  |
| C | -1.14403500 | 3.52903700  | -1.36890700 |
| C | -0.27409100 | 2.49202800  | -0.96811000 |
| H | 0.66511400  | 1.53670100  | 0.72131400  |
| C | 0.31743600  | 1.64300600  | -1.91153900 |
| C | 0.58825500  | 0.66201000  | -2.64115800 |
| C | -0.58825500 | -0.66201000 | -2.64115800 |
| C | -0.31743600 | -1.64300600 | -1.91153900 |
| C | 0.27409100  | -2.49202800 | -0.96811000 |
| C | 0.00421800  | -2.32877600 | 0.40879500  |
| C | 1.14403500  | -3.52903700 | -1.36890700 |
| C | 0.58825500  | -3.16285300 | 1.33988900  |
| H | -0.66511400 | -1.53670100 | 0.72131400  |
| C | 1.73040200  | -4.35301600 | -0.43061900 |
| C | 1.46121300  | -4.18436500 | 0.93611500  |
| H | 0.38130400  | -3.03386900 | 2.39504400  |
| H | 1.37776700  | 0.37511200  | -3.31624600 |
| H | -1.37776700 | -0.37511200 | -3.31624600 |
| H | 1.34609400  | -3.66772000 | -2.42360500 |
| H | -1.34609400 | 3.66772000  | -2.42360500 |
| H | 2.40187000  | -5.14381700 | -0.74119500 |
| H | -2.40187000 | 5.14381700  | -0.74119500 |
| C | -2.06661100 | 5.04382600  | 1.90444100  |

|   |             |             |            |
|---|-------------|-------------|------------|
| C | -2.57637500 | 5.76614900  | 2.71865900 |
| H | -3.02617100 | 6.40602400  | 3.43928600 |
| C | 2.06661100  | -5.04382600 | 1.90444100 |
| C | 2.57637500  | -5.76614900 | 2.71865900 |
| H | 3.02617100  | -6.40602400 | 3.43928600 |

SCF Done: E(UM062X) = -768.899798457 A.U.

<S\*\*2> = 0.2897

|                                          |                             |
|------------------------------------------|-----------------------------|
| Zero-point correction=                   | 0.225113 (Hartree/Particle) |
| Thermal correction to Energy=            | 0.285583                    |
| Thermal correction to Enthalpy=          | 0.287398                    |
| Thermal correction to Gibbs Free Energy= | 0.096958                    |

SCF Done: E(UB3LYP) = -769.306787373 A.U.

<S\*\*2> = 0.1656

### compound 8

|   |             |             |             |
|---|-------------|-------------|-------------|
| C | -2.34840000 | -0.69603400 | -0.00003100 |
| C | -1.14766300 | -1.38957200 | 0.00000500  |
| C | 0.07084000  | -0.70462800 | 0.00001800  |
| C | 0.07083600  | 0.70463200  | -0.00000500 |
| C | -1.14767000 | 1.38957000  | -0.00004300 |
| C | -2.34840300 | 0.69602700  | -0.00005600 |
| H | -3.28414300 | -1.24128300 | -0.00004100 |
| H | -1.13448500 | -2.47212900 | 0.00002400  |
| H | -1.13449700 | 2.47212700  | -0.00006200 |
| H | -3.28414900 | 1.24127100  | -0.00008500 |
| C | 1.29957200  | -1.43825400 | 0.00005500  |
| C | 2.32316600  | -2.06556600 | 0.00007700  |
| H | 3.23360400  | -2.61531200 | -0.00000600 |
| C | 1.29956500  | 1.43826300  | 0.00000900  |
| C | 2.32316100  | 2.06557300  | 0.00001300  |
| H | 3.23364200  | 2.61525100  | -0.00007700 |

SCF Done: E(RM062X) = -384.470914846 A.U.

|                                          |                             |
|------------------------------------------|-----------------------------|
| Zero-point correction=                   | 0.113113 (Hartree/Particle) |
| Thermal correction to Energy=            | 0.142053                    |
| Thermal correction to Enthalpy=          | 0.143868                    |
| Thermal correction to Gibbs Free Energy= | 0.032855                    |

SCF Done: E(RB3LYP) = -384.667164394 A.U.

**Transition state for the dimerization of compound 8**

|   |             |             |             |
|---|-------------|-------------|-------------|
| C | -4.69443100 | -1.89908300 | -0.06342100 |
| C | -3.51523900 | -2.40528700 | 0.48712200  |
| C | -4.80703400 | -0.54151300 | -0.32713500 |
| H | -5.52072400 | -2.56209500 | -0.28695400 |
| C | -2.45921400 | -1.56128500 | 0.77204100  |
| H | -3.42377200 | -3.46537300 | 0.69058300  |
| C | -3.75645900 | 0.33242000  | -0.04401700 |
| H | -5.71478300 | -0.13712900 | -0.75765900 |
| C | -2.55322600 | -0.17668500 | 0.51577200  |
| H | -1.54001900 | -1.94533000 | 1.19688800  |
| C | -1.48237800 | 0.67016500  | 0.82288700  |
| C | -0.41814800 | 1.32748300  | 0.77850000  |
| C | 0.41814700  | 1.32737000  | -0.77878900 |
| C | 1.48238100  | 0.67005500  | -0.82307700 |
| C | 2.55325700  | -0.17671400 | -0.51583100 |
| C | 2.45939500  | -1.56132500 | -0.77208600 |
| C | 3.75639500  | 0.33250600  | 0.04406000  |
| C | 3.51547400  | -2.40522700 | -0.48707100 |
| H | 1.54027200  | -1.94546400 | -1.19700600 |
| C | 4.80703000  | -0.54132400 | 0.32726300  |
| C | 4.69457800  | -1.89890700 | 0.06355200  |
| H | 3.42411600  | -3.46532400 | -0.69052200 |
| H | 5.71470900  | -0.13684700 | 0.75784900  |
| H | 5.52092000  | -2.56183500 | 0.28715400  |
| H | 0.16062100  | 1.95131000  | 1.43942000  |
| H | -0.16053500 | 1.95125700  | -1.43972800 |
| C | -3.88662900 | 1.72656200  | -0.32982800 |
| C | -4.00035900 | 2.89760200  | -0.57376900 |
| H | -4.10255700 | 3.93485700  | -0.78494700 |
| C | 3.88640100  | 1.72665600  | 0.32990800  |
| C | 4.00000100  | 2.89770100  | 0.57388900  |
| H | 4.10208800  | 3.93496000  | 0.78510300  |

SCF Done: E(UM062X) = -768.898217679 A.U.

<S\*\*2> = 0.2996

Zero-point correction= 0.225298 (Hartree/Particle)

Thermal correction to Energy= 0.285777

Thermal correction to Enthalpy= 0.287592

Thermal correction to Gibbs Free Energy= 0.096410

SCF Done: E(UB3LYP) = -769.304918724 A.U.

<S\*\*2> = 0.1689

### 3. Full Citation of Reference 27

Gaussian 09, Revision C.01, M. J. Frisch, G. W. Trucks, H. B. Schlegel, G. E. Scuseria, M. A. Robb, J. R. Cheeseman, G. Scalmani, V. Barone, B. Mennucci, G. A. Petersson, H. Nakatsuji, M. Caricato, X. Li, H. P. Hratchian, A. F. Izmaylov, J. Bloino, G. Zheng, J. L. Sonnenberg, M. Hada, M. Ehara, K. Toyota, R. Fukuda, J. Hasegawa, M. Ishida, T. Nakajima, Y. Honda, O. Kitao, H. Nakai, T. Vreven, J. A. Montgomery, Jr., J. E. Peralta, F. Ogliaro, M. Bearpark, J. J. Heyd, E. Brothers, K. N. Kudin, V. N. Staroverov, T. Keith, R. Kobayashi, J. Normand, K. Raghavachari, A. Rendell, J. C. Burant, S. S. Iyengar, J. Tomasi, M. Cossi, N. Rega, J. M. Millam, M. Klene, J. E. Knox, J. B. Cross, V. Bakken, C. Adamo, J. Jaramillo, R. Gomperts, R. E. Stratmann, O. Yazyev, A. J. Austin, R. Cammi, C. Pomelli, J. W. Ochterski, R. L. Martin, K. Morokuma, V. G. Zakrzewski, G. A. Voth, P. Salvador, J. J. Dannenberg, S. Dapprich, A. D. Daniels, O. Farkas, J. B. Foresman, J. V. Ortiz, J. Cioslowski, and D. J. Fox, Gaussian, Inc., Wallingford CT, 2010.
